# Supplementary material for: Branch xylem density variations across the Amazon Basin
Source: Copernicus journal article supplement (doi:10.5194/bg-6-545-2009), 2009-04-08
Supplement: Supplementary file 1 [file bg-6-545-2009-supplement.pdf]

## Supplement 1

| RegionCode | Region | Plot   | Family                  | Genus                     | species                | $\rho_x$<br>(kg m <sup>-3</sup> ) |
|------------|--------|--------|-------------------------|---------------------------|------------------------|-----------------------------------|
| 13         | Guiana | ACA-11 | <i>Boraginaceae</i>     | <i>Cordia</i>             | <i>sagotii</i>         | 507                               |
| 13         | Guiana | ACA-11 | <i>Burseraceae</i>      | <i>Protium</i>            | <i>sagotianum</i>      | 597                               |
| 13         | Guiana | ACA-11 | <i>Salicaceae</i>       | <i>Laetia</i>             | <i>procera</i>         | 602                               |
| 13         | Guiana | ACA-11 | <i>Meliaceae</i>        | <i>Carapa</i>             | <i>procera</i>         | 550                               |
| 13         | Guiana | ACA-11 | <i>Annonaceae</i>       | <i>Annona</i>             | <i>prevostiae</i>      | 368                               |
| 13         | Guiana | ACA-11 | <i>Euphorbiaceae</i>    | <i>Mabea</i>              | <i>piriri</i>          | 574                               |
| 13         | Guiana | ACA-11 | <i>Lecythidaceae</i>    | <i>Lecythis</i>           | <i>persistens</i>      | 652                               |
| 13         | Guiana | ACA-11 | <i>Sapindaceae</i>      | <i>Melicoccus</i>         | <i>pedicellaris</i>    | 757                               |
| 13         | Guiana | ACA-11 | <i>Urticaceae</i>       | <i>Pourouma</i>           | <i>minor</i>           | 609                               |
| 13         | Guiana | ACA-11 | <i>Rubiaceae</i>        | <i>Duroia</i>             | <i>longiflora</i>      | 683                               |
| 13         | Guiana | ACA-11 | <i>Sapotaceae</i>       | <i>Pouteria</i>           | <i>indet</i>           | 743                               |
| 13         | Guiana | ACA-11 | <i>Euphorbiaceae</i>    | <i>Drypetes</i>           | <i>indet</i>           | 639                               |
| 13         | Guiana | ACA-11 | <i>Lecythidaceae</i>    | <i>Gustavia</i>           | <i>hexapetala</i>      | 632                               |
| 13         | Guiana | ACA-11 | <i>Sapotaceae</i>       | <i>Micropholis</i>        | <i>guyanensis</i>      | 493                               |
| 13         | Guiana | ACA-11 | <i>Icacinaceae</i>      | <i>Poraqueiba</i>         | <i>guianensis</i>      | 709                               |
| 13         | Guiana | ACA-11 | <i>Fabaceae</i>         | <i>Eperua</i>             | <i>falcata</i>         | 516                               |
| 13         | Guiana | ACA-11 | <i>Lecythidaceae</i>    | <i>Lecythis</i>           | <i>decolorans</i>      | 595                               |
| 13         | Guiana | ACA-11 | <i>Burseraceae</i>      | <i>Protium</i>            | <i>decandrum</i>       | 491                               |
| 13         | Guiana | ACA-11 | <i>Chrysobalanaceae</i> | <i>Couepia</i>            | <i>caryophylloides</i> | 749                               |
| 13         | Guiana | ACA-11 | <i>Apocynaceae</i>      | <i>Ambelania</i>          | <i>acida</i>           | 572                               |
| 13         | Guiana | BAF-04 | <i>Lecythidaceae</i>    | <i>Lecythis</i>           | <i>zabucajo</i>        | 580                               |
| 13         | Guiana | BAF-04 | <i>Fabaceae</i>         | <i>Pseudopiptadenia</i>   | <i>suaveolens</i>      | 684                               |
| 13         | Guiana | BAF-04 | <i>Lauraceae</i>        | <i>Sextonia</i>           | <i>rubra</i>           | 593                               |
| 13         | Guiana | BAF-04 | <i>Malvaceae</i>        | <i>Sterculia</i>          | <i>pruriens</i>        | 398                               |
| 13         | Guiana | BAF-04 | <i>Annonaceae</i>       | <i>Unonopsis</i>          | <i>perrottetii</i>     | 632                               |
| 13         | Guiana | BAF-04 | <i>Rubiaceae</i>        | <i>Ferdinandusa</i>       | <i>paraensis</i>       | 560                               |
| 13         | Guiana | BAF-04 | <i>Apocynaceae</i>      | <i>Anartia</i>            | <i>meyerii</i>         | 531                               |
| 13         | Guiana | BAF-04 | <i>Fabaceae</i>         | <i>Abarema</i>            | <i>jupunba</i>         | 607                               |
| 13         | Guiana | BAF-04 | <i>Lauraceae</i>        | <i>indet</i>              | <i>indet</i>           | 626                               |
| 13         | Guiana | BAF-04 | <i>Sapotaceae</i>       | <i>Micropholis</i>        | <i>guyanensis</i>      | 561                               |
| 13         | Guiana | BAF-04 | <i>Olacaceae</i>        | <i>Minquartia</i>         | <i>guianensis</i>      | 743                               |
| 13         | Guiana | BAF-04 | <i>Apocynaceae</i>      | <i>Macoubea</i>           | <i>guianensis</i>      | 371                               |
| 13         | Guiana | BAF-04 | <i>Lauraceae</i>        | <i>Rhodostemonodaphne</i> | <i>grandis</i>         | 471                               |
| 13         | Guiana | BAF-04 | <i>Chrysobalanaceae</i> | <i>Parinari</i>           | <i>excelsa</i>         | 600                               |
| 13         | Guiana | BAF-04 | <i>Fabaceae</i>         | <i>Poecilanthè</i>        | <i>effusa</i>          | 797                               |
| 13         | Guiana | BAF-04 | <i>Simaroubaceae</i>    | <i>Simaba</i>             | <i>cedron</i>          | 398                               |
| 13         | Guiana | BAF-04 | <i>Fabaceae</i>         | <i>Swartzia</i>           | <i>benthamiana</i>     | 632                               |
| 13         | Guiana | BAF-04 | <i>Burseraceae</i>      | <i>Protium</i>            | <i>apiculatum</i>      | 474                               |
| 13         | Guiana | BAF-04 | <i>Simaroubaceae</i>    | <i>Simarouba</i>          | <i>amara</i>           | 505                               |
| 13         | Guiana | BAF-04 | <i>Apocynaceae</i>      | <i>Aspidosperma</i>       | <i>album</i>           | 718                               |
| 13         | Guiana | GFX-07 | <i>Malvaceae</i>        | <i>Theobroma</i>          | <i>subincanum</i>      | 439                               |
| 13         | Guiana | GFX-07 | <i>Malvaceae</i>        | <i>Theobroma</i>          | <i>subincanum</i>      | 385                               |
| 13         | Guiana | GFX-07 | <i>Lecythidaceae</i>    | <i>Lecythis</i>           | <i>persistens</i>      | 705                               |
| 13         | Guiana | GFX-07 | <i>Lecythidaceae</i>    | <i>Lecythis</i>           | <i>persistens</i>      | 269                               |
| 13         | Guiana | GFX-07 | <i>Lecythidaceae</i>    | <i>Eschweilera</i>        | <i>parviflora</i>      | 824                               |
| 13         | Guiana | GFX-07 | <i>Lecythidaceae</i>    | <i>Eschweilera</i>        | <i>parviflora</i>      | 644                               |
| 13         | Guiana | GFX-07 | <i>Burseraceae</i>      | <i>Protium</i>            | <i>opacum</i>          | 543                               |
| 13         | Guiana | GFX-07 | <i>Clusiaceae</i>       | <i>Tovomita</i>           | <i>indet</i>           | 626                               |
| 13         | Guiana | GFX-07 | <i>indet</i>            | <i>indet</i>              | <i>indet</i>           | 623                               |
| 13         | Guiana | GFX-07 | <i>indet</i>            | <i>indet</i>              | <i>indet</i>           | 610                               |

|    |        |        |                         |                     |                     |     |
|----|--------|--------|-------------------------|---------------------|---------------------|-----|
| 13 | Guiana | GFX-07 | <i>Lecythidaceae</i>    | <i>Eschweilera</i>  | <i>indet</i>        | 870 |
| 13 | Guiana | GFX-07 | <i>Clusiaceae</i>       | <i>Caraipa</i>      | <i>indet</i>        | 810 |
| 13 | Guiana | GFX-07 | <i>Myristicaceae</i>    | <i>Iryanthera</i>   | <i>hostmannii</i>   | 655 |
| 13 | Guiana | GFX-07 | <i>Myristicaceae</i>    | <i>Iryanthera</i>   | <i>hostmannii</i>   | 518 |
| 13 | Guiana | GFX-07 | <i>Elaeocarpaceae</i>   | <i>Sloanea</i>      | <i>grandiflora</i>  | 585 |
| 13 | Guiana | GFX-07 | <i>Fabaceae</i>         | <i>Eperua</i>       | <i>falcata</i>      | 589 |
| 13 | Guiana | GFX-07 | <i>Fabaceae</i>         | <i>Eperua</i>       | <i>falcata</i>      | 556 |
| 13 | Guiana | GFX-07 | <i>Fabaceae</i>         | <i>Eperua</i>       | <i>falcata</i>      | 554 |
| 13 | Guiana | GFX-07 | <i>Fabaceae</i>         | <i>Eperua</i>       | <i>falcata</i>      | 513 |
| 13 | Guiana | GFX-07 | <i>Lecythidaceae</i>    | <i>Eschweilera</i>  | <i>coriacea</i>     | 707 |
| 13 | Guiana | GFX-09 | <i>Annonaceae</i>       | <i>Xylopia</i>      | <i>surinamensis</i> | 439 |
| 13 | Guiana | GFX-09 | <i>Annonaceae</i>       | <i>Xylopia</i>      | <i>surinamensis</i> | 439 |
| 13 | Guiana | GFX-09 | <i>Sapotaceae</i>       | <i>Pouteria</i>     | <i>singularis</i>   | 674 |
| 13 | Guiana | GFX-09 | <i>Lecythidaceae</i>    | <i>Lecythis</i>     | <i>persistens</i>   | 683 |
| 13 | Guiana | GFX-09 | <i>Annonaceae</i>       | <i>Xylopia</i>      | <i>nitida</i>       | 584 |
| 13 | Guiana | GFX-09 | <i>Rubiaceae</i>        | <i>Duroia</i>       | <i>longiflora</i>   | 772 |
| 13 | Guiana | GFX-09 | <i>Salicaceae</i>       | <i>Casearia</i>     | <i>indet</i>        | 573 |
| 13 | Guiana | GFX-09 | <i>Lecythidaceae</i>    | <i>Gustavia</i>     | <i>hexapetala</i>   | 833 |
| 13 | Guiana | GFX-09 | <i>Icacinaceae</i>      | <i>Poraqueiba</i>   | <i>guianensis</i>   | 687 |
| 13 | Guiana | GFX-09 | <i>Fabaceae</i>         | <i>Naucleopsis</i>  | <i>guianensis</i>   | 675 |
| 13 | Guiana | GFX-09 | <i>Fabaceae</i>         | <i>Dicorynia</i>    | <i>guianensis</i>   | 591 |
| 13 | Guiana | GFX-09 | <i>Fabaceae</i>         | <i>Dicorynia</i>    | <i>guianensis</i>   | 481 |
| 13 | Guiana | GFX-09 | <i>Malvaceae</i>        | <i>Catostemma</i>   | <i>fragrans</i>     | 660 |
| 13 | Guiana | GFX-09 | <i>Fabaceae</i>         | <i>Eperua</i>       | <i>falcata</i>      | 733 |
| 13 | Guiana | GFX-09 | <i>Fabaceae</i>         | <i>Eperua</i>       | <i>falcata</i>      | 614 |
| 13 | Guiana | GFX-09 | <i>Fabaceae</i>         | <i>Eperua</i>       | <i>falcata</i>      | 573 |
| 13 | Guiana | GFX-09 | <i>Fabaceae</i>         | <i>Eperua</i>       | <i>falcata</i>      | 387 |
| 13 | Guiana | GFX-09 | <i>Simaroubaceae</i>    | <i>Simaba</i>       | <i>cedron</i>       | 782 |
| 13 | Guiana | GFX-09 | <i>Clusiaceae</i>       | <i>Garcinia</i>     | <i>benthamiana</i>  | 763 |
| 13 | Guiana | GFX-09 | <i>Clusiaceae</i>       | <i>Garcinia</i>     | <i>benthamiana</i>  | 729 |
| 13 | Guiana | GFX-09 | <i>Annonaceae</i>       | <i>Oxandra</i>      | <i>asbeckii</i>     | 845 |
| 13 | Guiana | GFX-09 | <i>Annonaceae</i>       | <i>Oxandra</i>      | <i>asbeckii</i>     | 777 |
| 13 | Guiana | GFX-09 | <i>Annonaceae</i>       | <i>Oxandra</i>      | <i>asbeckii</i>     | 743 |
| 13 | Guiana | GFX-09 | <i>Annonaceae</i>       | <i>Oxandra</i>      | <i>asbeckii</i>     | 733 |
| 13 | Guiana | GFX-09 | <i>Annonaceae</i>       | <i>Oxandra</i>      | <i>asbeckii</i>     | 731 |
| 13 | Guiana | GFX-09 | <i>Annonaceae</i>       | <i>Oxandra</i>      | <i>asbeckii</i>     | 707 |
| 13 | Guiana | GFX-09 | <i>Annonaceae</i>       | <i>Oxandra</i>      | <i>asbeckii</i>     | 693 |
| 13 | Guiana | GFX-09 | <i>Myristicaceae</i>    | <i>Iryanthera</i>   | <i>sagotiana</i>    | 612 |
| 13 | Guiana | M17-11 | <i>Meliaceae</i>        | <i>Guarea</i>       | <i>silvatica</i>    | 579 |
| 13 | Guiana | M17-11 | <i>Boraginaceae</i>     | <i>Cordia</i>       | <i>sagotii</i>      | 218 |
| 13 | Guiana | M17-11 | <i>Sapotaceae</i>       | <i>Pradosia</i>     | <i>ptychandra</i>   | 560 |
| 13 | Guiana | M17-11 | <i>Salicaceae</i>       | <i>Laetia</i>       | <i>procera</i>      | 624 |
| 13 | Guiana | M17-11 | <i>Fabaceae</i>         | <i>Tachigali</i>    | <i>paraensis</i>    | 666 |
| 13 | Guiana | M17-11 | <i>Lauraceae</i>        | <i>Aniba</i>        | <i>panurensis</i>   | 582 |
| 13 | Guiana | M17-11 | <i>Annonaceae</i>       | <i>Xylopia</i>      | <i>nitida</i>       | 262 |
| 13 | Guiana | M17-11 | <i>Malvaceae</i>        | <i>Sterculia</i>    | <i>lisae</i>        | 501 |
| 13 | Guiana | M17-11 | <i>Chrysobalanaceae</i> | <i>Licania</i>      | <i>latistipula</i>  | 648 |
| 13 | Guiana | M17-11 | <i>Myristicaceae</i>    | <i>Virola</i>       | <i>indet</i>        | 355 |
| 13 | Guiana | M17-11 | <i>Chrysobalanaceae</i> | <i>Licania</i>      | <i>indet</i>        | 707 |
| 13 | Guiana | M17-11 | <i>Fabaceae</i>         | <i>Hymenolobium</i> | <i>indet</i>        | 724 |
| 13 | Guiana | M17-11 | <i>Rubiaceae</i>        | <i>Palicourea</i>   | <i>guianensis</i>   | 510 |
| 13 | Guiana | M17-11 | <i>Euphorbiaceae</i>    | <i>Hevea</i>        | <i>guianensis</i>   | 559 |
| 13 | Guiana | M17-11 | <i>Chrysobalanaceae</i> | <i>Hirtella</i>     | <i>glandulosa</i>   | 793 |
| 13 | Guiana | M17-11 | <i>Fabaceae</i>         | <i>Ormosia</i>      | <i>flava</i>        | 620 |

|    |        |        |                         |                         |                      |     |
|----|--------|--------|-------------------------|-------------------------|----------------------|-----|
| 13 | Guiana | M17-11 | <i>Sapotaceae</i>       | <i>Pouteria</i>         | <i>decorticans</i>   | 751 |
| 13 | Guiana | M17-11 | <i>Sapotaceae</i>       | <i>Pouteria</i>         | <i>cuspidata</i>     | 708 |
| 13 | Guiana | M17-11 | <i>Burseraceae</i>      | <i>Dacryodes</i>        | <i>cuspidata</i>     | 493 |
| 13 | Guiana | M17-11 | <i>Chrysobalanaceae</i> | <i>Hirtella</i>         | <i>bicornis</i>      | 736 |
| 13 | Guiana | M17-11 | <i>Euphorbiaceae</i>    | <i>Glycydendron</i>     | <i>amazonicum</i>    | 547 |
| 13 | Guiana | NGH-20 | <i>Burseraceae</i>      | <i>Protium</i>          | <i>trifoliolatum</i> | 620 |
| 13 | Guiana | NGH-20 | <i>Burseraceae</i>      | <i>Protium</i>          | <i>sagotianum</i>    | 629 |
| 13 | Guiana | NGH-20 | <i>Lauraceae</i>        | <i>Sextonia</i>         | <i>rubra</i>         | 573 |
| 13 | Guiana | NGH-20 | <i>Fabaceae</i>         | <i>Pseudopiptadenia</i> | <i>psilostachya</i>  | 636 |
| 13 | Guiana | NGH-20 | <i>Ixonanthaceae</i>    | <i>Cyrillopsis</i>      | <i>paraensis</i>     | 764 |
| 13 | Guiana | NGH-20 | <i>Moraceae</i>         | <i>Trymatococcus</i>    | <i>oligandrus</i>    | 686 |
| 13 | Guiana | NGH-20 | <i>Burseraceae</i>      | <i>Protium</i>          | <i>morii</i>         | 408 |
| 13 | Guiana | NGH-20 | <i>Chrysobalanaceae</i> | <i>Licania</i>          | <i>membranacea</i>   | 814 |
| 13 | Guiana | NGH-20 | <i>Chrysobalanaceae</i> | <i>Licania</i>          | <i>membranacea</i>   | 713 |
| 13 | Guiana | NGH-20 | <i>Chrysobalanaceae</i> | <i>Licania</i>          | <i>membranacea</i>   | 705 |
| 13 | Guiana | NGH-20 | <i>Apocynaceae</i>      | <i>Himatanthus</i>      | <i>indet</i>         | 512 |
| 13 | Guiana | NGH-20 | <i>Malpighiaceae</i>    | <i>Bunchosia</i>        | <i>indet</i>         | 589 |
| 13 | Guiana | NGH-20 | <i>Sapindaceae</i>      | <i>Vouarana</i>         | <i>guianensis</i>    | 625 |
| 13 | Guiana | NGH-20 | <i>Sapotaceae</i>       | <i>Chrysophyllum</i>    | <i>eximium</i>       | 698 |
| 13 | Guiana | NGH-20 | <i>Meliaceae</i>        | <i>Trichilia</i>        | <i>cipo</i>          | 716 |
| 13 | Guiana | NGH-20 | <i>Chrysobalanaceae</i> | <i>Couepia</i>          | <i>bracteosa</i>     | 805 |
| 13 | Guiana | NGH-20 | <i>Fabaceae</i>         | <i>Inga</i>             | <i>brachystachys</i> | 772 |
| 13 | Guiana | NGH-20 | <i>Fabaceae</i>         | <i>Vouacapoua</i>       | <i>americana</i>     | 589 |
| 13 | Guiana | NGH-20 | <i>Burseraceae</i>      | <i>Tetragastris</i>     | <i>altissima</i>     | 412 |
| 13 | Guiana | NGH-20 | <i>Melastomataceae</i>  | <i>Miconia</i>          | <i>acuminata</i>     | 624 |
| 13 | Guiana | NGL-11 | <i>Sapindaceae</i>      | <i>Cupania</i>          | <i>scrobiculata</i>  | 715 |
| 13 | Guiana | NGL-11 | <i>Burseraceae</i>      | <i>Protium</i>          | <i>sagotianum</i>    | 614 |
| 13 | Guiana | NGL-11 | <i>Lecythidaceae</i>    | <i>Lecythis</i>         | <i>persistens</i>    | 782 |
| 13 | Guiana | NGL-11 | <i>Lecythidaceae</i>    | <i>Lecythis</i>         | <i>persistens</i>    | 690 |
| 13 | Guiana | NGL-11 | <i>Meliaceae</i>        | <i>Trichilia</i>        | <i>pallida</i>       | 538 |
| 13 | Guiana | NGL-11 | <i>Sapotaceae</i>       | <i>Chrysophyllum</i>    | <i>lucentifolium</i> | 598 |
| 13 | Guiana | NGL-11 | <i>Violaceae</i>        | <i>Amphirrhox</i>       | <i>longifolia</i>    | 621 |
| 13 | Guiana | NGL-11 | <i>Myristicaceae</i>    | <i>Virola</i>           | <i>kwatae</i>        | 391 |
| 13 | Guiana | NGL-11 | <i>Celastraceae</i>     | <i>indet</i>            | <i>indet</i>         | 735 |
| 13 | Guiana | NGL-11 | <i>Burseraceae</i>      | <i>Dacryodes</i>        | <i>indet</i>         | 549 |
| 13 | Guiana | NGL-11 | <i>Fabaceae</i>         | <i>Bauhinia</i>         | <i>indet</i>         | 550 |
| 13 | Guiana | NGL-11 | <i>Fabaceae</i>         | <i>Inga</i>             | <i>huberi</i>        | 515 |
| 13 | Guiana | NGL-11 | <i>Moraceae</i>         | <i>Bagassa</i>          | <i>guianensis</i>    | 472 |
| 13 | Guiana | NGL-11 | <i>Nyctaginaceae</i>    | <i>Neea</i>             | <i>floribunda</i>    | 492 |
| 13 | Guiana | NGL-11 | <i>Euphorbiaceae</i>    | <i>Drypetes</i>         | <i>fanshawei</i>     | 590 |
| 13 | Guiana | NGL-11 | <i>Malvaceae</i>        | <i>Quararibea</i>       | <i>duckei</i>        | 460 |
| 13 | Guiana | NGL-11 | <i>Sapotaceae</i>       | <i>Diploon</i>          | <i>cuspidatum</i>    | 766 |
| 13 | Guiana | NGL-11 | <i>Euphorbiaceae</i>    | <i>Hyeronima</i>        | <i>alchorneoides</i> | 434 |
| 13 | Guiana | NGL-11 | <i>Euphorbiaceae</i>    | <i>Hyeronima</i>        | <i>alchorneoides</i> | 398 |
| 13 | Guiana | NGL-11 | <i>Rubiaceae</i>        | <i>Guettarda</i>        | <i>acreana</i>       | 672 |
| 13 | Guiana | SLV-01 | <i>Fabaceae</i>         | <i>Bocoa</i>            | <i>prouacensis</i>   | 850 |
| 13 | Guiana | SLV-01 | <i>Fabaceae</i>         | <i>Bocoa</i>            | <i>prouacensis</i>   | 775 |
| 13 | Guiana | SLV-01 | <i>Lecythidaceae</i>    | <i>Lecythis</i>         | <i>persistens</i>    | 749 |
| 13 | Guiana | SLV-01 | <i>Burseraceae</i>      | <i>Protium</i>          | <i>opacum</i>        | 609 |
| 13 | Guiana | SLV-01 | <i>Chrysobalanaceae</i> | <i>Licania</i>          | <i>membranacea</i>   | 803 |
| 13 | Guiana | SLV-01 | <i>Malpighiaceae</i>    | <i>Byrsonima</i>        | <i>laevigata</i>     | 488 |
| 13 | Guiana | SLV-01 | <i>Sapotaceae</i>       | <i>Pouteria</i>         | <i>jariensis</i>     | 659 |
| 13 | Guiana | SLV-01 | <i>Nyctaginaceae</i>    | <i>Neea</i>             | <i>indet</i>         | 673 |
| 13 | Guiana | SLV-01 | <i>Myrtaceae</i>        | <i>indet</i>            | <i>indet</i>         | 695 |

|    |           |        |                         |                     |                         |     |
|----|-----------|--------|-------------------------|---------------------|-------------------------|-----|
| 13 | Guiana    | SLV-01 | <i>Myrtaceae</i>        | <i>Eugenia</i>      | <i>indet</i>            | 750 |
| 13 | Guiana    | SLV-01 | <i>Euphorbiaceae</i>    | <i>Sandwithia</i>   | <i>guianensis</i>       | 663 |
| 13 | Guiana    | SLV-01 | <i>Fabaceae</i>         | <i>Dicorynia</i>    | <i>guianensis</i>       | 494 |
| 13 | Guiana    | SLV-01 | <i>Sapotaceae</i>       | <i>Pouteria</i>     | <i>grandis</i>          | 515 |
| 13 | Guiana    | SLV-01 | <i>Burseraceae</i>      | <i>Protium</i>      | <i>gallicum</i>         | 714 |
| 13 | Guiana    | SLV-01 | <i>Burseraceae</i>      | <i>Protium</i>      | <i>gallicum</i>         | 641 |
| 13 | Guiana    | SLV-01 | <i>Annonaceae</i>       | <i>Pseudoxandra</i> | <i>cuspidata</i>        | 579 |
| 13 | Guiana    | SLV-01 | <i>Sapotaceae</i>       | <i>Manilkara</i>    | <i>bidentata</i>        | 700 |
| 13 | Guiana    | SLV-01 | <i>Annonaceae</i>       | <i>Oxandra</i>      | <i>asbeckii</i>         | 851 |
| 13 | Guiana    | SLV-01 | <i>Annonaceae</i>       | <i>Oxandra</i>      | <i>asbeckii</i>         | 759 |
| 13 | Guiana    | SLV-01 | <i>Chrysobalanaceae</i> | <i>Licania</i>      | <i>alba</i>             | 720 |
| 13 | Guiana    | TRE-01 | <i>Urticaceae</i>       | <i>Pourouma</i>     | <i>villosa</i>          | 611 |
| 13 | Guiana    | TRE-01 | <i>Malvaceae</i>        | <i>Sterculia</i>    | <i>speciosa</i>         | 487 |
| 13 | Guiana    | TRE-01 | <i>Vochysiaceae</i>     | <i>Qualea</i>       | <i>rosea</i>            | 517 |
| 13 | Guiana    | TRE-01 | <i>Sapotaceae</i>       | <i>Pradosia</i>     | <i>ptychandra</i>       | 682 |
| 13 | Guiana    | TRE-01 | <i>Lecythidaceae</i>    | <i>Lecythis</i>     | <i>persistens</i>       | 784 |
| 13 | Guiana    | TRE-01 | <i>Lecythidaceae</i>    | <i>Lecythis</i>     | <i>persistens</i>       | 731 |
| 13 | Guiana    | TRE-01 | <i>Lecythidaceae</i>    | <i>Lecythis</i>     | <i>persistens</i>       | 686 |
| 13 | Guiana    | TRE-01 | <i>Myrtaceae</i>        | <i>Eugenia</i>      | <i>macrocalyx</i>       | 800 |
| 13 | Guiana    | TRE-01 | <i>Fabaceae</i>         | <i>Inga</i>         | <i>longipedunculata</i> | 638 |
| 13 | Guiana    | TRE-01 | <i>Fabaceae</i>         | <i>Inga</i>         | <i>longipedunculata</i> | 631 |
| 13 | Guiana    | TRE-01 | <i>Fabaceae</i>         | <i>Inga</i>         | <i>longipedunculata</i> | 627 |
| 13 | Guiana    | TRE-01 | <i>Myristicaceae</i>    | <i>Virola</i>       | <i>kwatae</i>           | 511 |
| 13 | Guiana    | TRE-01 | <i>Combretaceae</i>     | <i>Terminalia</i>   | <i>indet</i>            | 756 |
| 13 | Guiana    | TRE-01 | <i>Melastomataceae</i>  | <i>Miconia</i>      | <i>indet</i>            | 630 |
| 13 | Guiana    | TRE-01 | <i>Moraceae</i>         | <i>Ficus</i>        | <i>indet</i>            | 577 |
| 13 | Guiana    | TRE-01 | <i>Dichapetalaceae</i>  | <i>Tapura</i>       | <i>guianensis</i>       | 614 |
| 13 | Guiana    | TRE-01 | <i>Burseraceae</i>      | <i>Protium</i>      | <i>cuneatum</i>         | 555 |
| 13 | Guiana    | TRE-01 | <i>Lecythidaceae</i>    | <i>Eschweilera</i>  | <i>coriacea</i>         | 707 |
| 13 | Guiana    | TRE-01 | <i>Icacinaceae</i>      | <i>Dendrobangia</i> | <i>boliviana</i>        | 581 |
| 13 | Guiana    | TRE-01 | <i>Lecythidaceae</i>    | <i>Lecythis</i>     | <i>aurantiaca</i>       | 701 |
| 12 | EP-Brazil | BRA-01 | <i>Rhizophoraceae</i>   | <i>Rhizophora</i>   | <i>mangle</i>           | 867 |
| 12 | EP-Brazil | BRA-01 | <i>Rhizophoraceae</i>   | <i>Rhizophora</i>   | <i>mangle</i>           | 836 |
| 12 | EP-Brazil | BRA-01 | <i>Rhizophoraceae</i>   | <i>Rhizophora</i>   | <i>mangle</i>           | 783 |
| 12 | EP-Brazil | BRA-01 | <i>Rhizophoraceae</i>   | <i>Rhizophora</i>   | <i>mangle</i>           | 777 |
| 12 | EP-Brazil | BRA-01 | <i>Rhizophoraceae</i>   | <i>Rhizophora</i>   | <i>mangle</i>           | 760 |
| 12 | EP-Brazil | BRA-01 | <i>Rhizophoraceae</i>   | <i>Rhizophora</i>   | <i>mangle</i>           | 736 |
| 12 | EP-Brazil | BRA-01 | <i>Rhizophoraceae</i>   | <i>Rhizophora</i>   | <i>mangle</i>           | 644 |
| 12 | EP-Brazil | BRA-01 | <i>Rhizophoraceae</i>   | <i>Rhizophora</i>   | <i>mangle</i>           | 631 |
| 12 | EP-Brazil | BRA-01 | <i>Rhizophoraceae</i>   | <i>Rhizophora</i>   | <i>mangle</i>           | 620 |
| 12 | EP-Brazil | BRA-01 | <i>Rhizophoraceae</i>   | <i>Rhizophora</i>   | <i>mangle</i>           | 578 |
| 12 | EP-Brazil | BRA-01 | <i>Scrophulariaceae</i> | <i>Bontia</i>       | <i>germinans</i>        | 866 |
| 12 | EP-Brazil | BRA-01 | <i>Scrophulariaceae</i> | <i>Bontia</i>       | <i>germinans</i>        | 819 |
| 12 | EP-Brazil | BRA-01 | <i>Scrophulariaceae</i> | <i>Bontia</i>       | <i>germinans</i>        | 811 |
| 12 | EP-Brazil | BRA-01 | <i>Scrophulariaceae</i> | <i>Bontia</i>       | <i>germinans</i>        | 725 |
| 12 | EP-Brazil | BRA-01 | <i>Scrophulariaceae</i> | <i>Bontia</i>       | <i>germinans</i>        | 725 |
| 12 | EP-Brazil | BRA-01 | <i>Scrophulariaceae</i> | <i>Bontia</i>       | <i>germinans</i>        | 704 |
| 12 | EP-Brazil | BRA-01 | <i>Scrophulariaceae</i> | <i>Bontia</i>       | <i>germinans</i>        | 697 |
| 12 | EP-Brazil | BRA-01 | <i>Scrophulariaceae</i> | <i>Bontia</i>       | <i>germinans</i>        | 638 |
| 12 | EP-Brazil | BRA-01 | <i>Scrophulariaceae</i> | <i>Bontia</i>       | <i>germinans</i>        | 624 |
| 12 | EP-Brazil | BRA-01 | <i>Scrophulariaceae</i> | <i>Bontia</i>       | <i>germinans</i>        | 609 |
| 12 | EP-Brazil | CPP-01 | <i>Sapotaceae</i>       | <i>Pouteria</i>     | <i>venosa</i>           | 726 |
| 12 | EP-Brazil | CPP-01 | <i>Anacardiaceae</i>    | <i>Thyrsodium</i>   | <i>paraense</i>         | 700 |
| 12 | EP-Brazil | CPP-01 | <i>Urticaceae</i>       | <i>Pourouma</i>     | <i>mollis</i>           | 564 |

|    |           |        |                         |                         |                      |     |
|----|-----------|--------|-------------------------|-------------------------|----------------------|-----|
| 12 | EP-Brazil | CPP-01 | <i>Fabaceae</i>         | <i>Inga</i>             | <i>indet</i>         | 680 |
| 12 | EP-Brazil | CPP-01 | <i>indet</i>            | <i>indet</i>            | <i>indet</i>         | 657 |
| 12 | EP-Brazil | CPP-01 | <i>Lecythidaceae</i>    | <i>Lecythis</i>         | <i>idatimon</i>      | 731 |
| 12 | EP-Brazil | CPP-01 | <i>Lecythidaceae</i>    | <i>Lecythis</i>         | <i>idatimon</i>      | 647 |
| 12 | EP-Brazil | CPP-01 | <i>Sapotaceae</i>       | <i>Micropholis</i>      | <i>guyanensis</i>    | 581 |
| 12 | EP-Brazil | CPP-01 | <i>Humiriaceae</i>      | <i>Vantanea</i>         | <i>guianensis</i>    | 715 |
| 12 | EP-Brazil | CPP-01 | <i>Violaceae</i>        | <i>Rinorea</i>          | <i>guianensis</i>    | 377 |
| 12 | EP-Brazil | CPP-01 | <i>Chrysobalanaceae</i> | <i>Couepia</i>          | <i>guianensis</i>    | 727 |
| 12 | EP-Brazil | CPP-01 | <i>Burseraceae</i>      | <i>Protium</i>          | <i>giganteum</i>     | 586 |
| 12 | EP-Brazil | CPP-01 | <i>Burseraceae</i>      | <i>Protium</i>          | <i>giganteum</i>     | 563 |
| 12 | EP-Brazil | CPP-01 | <i>Fabaceae</i>         | <i>Batesia</i>          | <i>floribunda</i>    | 581 |
| 12 | EP-Brazil | CPP-01 | <i>Lauraceae</i>        | <i>Ocotea</i>           | <i>cujumari</i>      | 738 |
| 12 | EP-Brazil | CPP-01 | <i>Lecythidaceae</i>    | <i>Eschweilera</i>      | <i>coriacea</i>      | 722 |
| 12 | EP-Brazil | CPP-01 | <i>Lecythidaceae</i>    | <i>Eschweilera</i>      | <i>coriacea</i>      | 710 |
| 12 | EP-Brazil | CPP-01 | <i>Lecythidaceae</i>    | <i>Eschweilera</i>      | <i>coriacea</i>      | 709 |
| 12 | EP-Brazil | CPP-01 | <i>Burseraceae</i>      | <i>Protium</i>          | <i>altsonii</i>      | 704 |
| 12 | EP-Brazil | CPP-01 | <i>Burseraceae</i>      | <i>Protium</i>          | <i>altsonii</i>      | 568 |
| 12 | EP-Brazil | MBO-01 | <i>Malvaceae</i>        | <i>Theobroma</i>        | <i>speciosum</i>     | 639 |
| 12 | EP-Brazil | MBO-01 | <i>Dichapetalaceae</i>  | <i>Tapura</i>           | <i>singularis</i>    | 769 |
| 12 | EP-Brazil | MBO-01 | <i>Fabaceae</i>         | <i>Pseudopiptadenia</i> | <i>psilostachya</i>  | 595 |
| 12 | EP-Brazil | MBO-01 | <i>Moraceae</i>         | <i>Helicostylis</i>     | <i>pedunculata</i>   | 477 |
| 12 | EP-Brazil | MBO-01 | <i>Humiriaceae</i>      | <i>Vantanea</i>         | <i>parviflora</i>    | 650 |
| 12 | EP-Brazil | MBO-01 | <i>Urticaceae</i>       | <i>Pourouma</i>         | <i>mollis</i>        | 588 |
| 12 | EP-Brazil | MBO-01 | <i>Sapotaceae</i>       | <i>Pouteria</i>         | <i>lasiocarpa</i>    | 812 |
| 12 | EP-Brazil | MBO-01 | <i>Rubiaceae</i>        | <i>Ixora</i>            | <i>indet</i>         | 621 |
| 12 | EP-Brazil | MBO-01 | <i>Annonaceae</i>       | <i>Annona</i>           | <i>indet</i>         | 321 |
| 12 | EP-Brazil | MBO-01 | <i>Lecythidaceae</i>    | <i>Lecythis</i>         | <i>idatimon</i>      | 483 |
| 12 | EP-Brazil | MBO-01 | <i>Vochysiaceae</i>     | <i>Vochysia</i>         | <i>guianensis</i>    | 663 |
| 12 | EP-Brazil | MBO-01 | <i>Vochysiaceae</i>     | <i>Vochysia</i>         | <i>guianensis</i>    | 591 |
| 12 | EP-Brazil | MBO-01 | <i>Vochysiaceae</i>     | <i>Vochysia</i>         | <i>guianensis</i>    | 554 |
| 12 | EP-Brazil | MBO-01 | <i>Lauraceae</i>        | <i>Ocotea</i>           | <i>cujumari</i>      | 573 |
| 12 | EP-Brazil | MBO-01 | <i>Lecythidaceae</i>    | <i>Eschweilera</i>      | <i>coriacea</i>      | 750 |
| 12 | EP-Brazil | MBO-01 | <i>Lecythidaceae</i>    | <i>Eschweilera</i>      | <i>coriacea</i>      | 631 |
| 12 | EP-Brazil | MBO-01 | <i>Fabaceae</i>         | <i>Inga</i>             | <i>cayennensis</i>   | 805 |
| 12 | EP-Brazil | MBO-01 | <i>Fabaceae</i>         | <i>Vouacapoua</i>       | <i>americana</i>     | 758 |
| 11 | CP-Brazil | CAX-01 | <i>Apocynaceae</i>      | <i>Geissospermum</i>    | <i>sericeum</i>      | 735 |
| 11 | CP-Brazil | CAX-01 | <i>Annonaceae</i>       | <i>Unonopsis</i>        | <i>rufescens</i>     | 708 |
| 11 | CP-Brazil | CAX-01 | <i>Nyctaginaceae</i>    | <i>Neea</i>             | <i>oppositifolia</i> | 598 |
| 11 | CP-Brazil | CAX-01 | <i>Chrysobalanaceae</i> | <i>Licania</i>          | <i>octandra</i>      | 906 |
| 11 | CP-Brazil | CAX-01 | <i>Lecythidaceae</i>    | <i>Eschweilera</i>      | <i>micrantha</i>     | 764 |
| 11 | CP-Brazil | CAX-01 | <i>Elaeocarpaceae</i>   | <i>Sloanea</i>          | <i>indet</i>         | 727 |
| 11 | CP-Brazil | CAX-01 | <i>Sapotaceae</i>       | <i>indet</i>            | <i>indet</i>         | 776 |
| 11 | CP-Brazil | CAX-01 | <i>indet</i>            | <i>indet</i>            | <i>indet</i>         | 671 |
| 11 | CP-Brazil | CAX-01 | <i>Lecythidaceae</i>    | <i>Eschweilera</i>      | <i>indet</i>         | 797 |
| 11 | CP-Brazil | CAX-01 | <i>Lecythidaceae</i>    | <i>Eschweilera</i>      | <i>indet</i>         | 606 |
| 11 | CP-Brazil | CAX-01 | <i>Lecythidaceae</i>    | <i>Eschweilera</i>      | <i>indet</i>         | 483 |
| 11 | CP-Brazil | CAX-01 | <i>Lecythidaceae</i>    | <i>Lecythis</i>         | <i>idatimon</i>      | 803 |
| 11 | CP-Brazil | CAX-01 | <i>Lecythidaceae</i>    | <i>Lecythis</i>         | <i>idatimon</i>      | 706 |
| 11 | CP-Brazil | CAX-01 | <i>Chrysobalanaceae</i> | <i>Licania</i>          | <i>heteromorpha</i>  | 820 |
| 11 | CP-Brazil | CAX-01 | <i>Celastraceae</i>     | <i>Maytenus</i>         | <i>guyanensis</i>    | 812 |
| 11 | CP-Brazil | CAX-01 | <i>Violaceae</i>        | <i>Rinorea</i>          | <i>guianensis</i>    | 645 |
| 11 | CP-Brazil | CAX-01 | <i>Violaceae</i>        | <i>Rinorea</i>          | <i>guianensis</i>    | 449 |
| 11 | CP-Brazil | CAX-01 | <i>Sapotaceae</i>       | <i>Pouteria</i>         | <i>decorticans</i>   | 826 |
| 11 | CP-Brazil | CAX-01 | <i>Moraceae</i>         | <i>Trymatococcus</i>    | <i>amazonicus</i>    | 723 |

|    |           |        |                         |                       |                      |      |
|----|-----------|--------|-------------------------|-----------------------|----------------------|------|
| 11 | CP-Brazil | CAX-02 | <i>Burseraceae</i>      | <i>Protium</i>        | <i>trifoliolatum</i> | 601  |
| 11 | CP-Brazil | CAX-02 | <i>Burseraceae</i>      | <i>Protium</i>        | <i>tenuifolium</i>   | 512  |
| 11 | CP-Brazil | CAX-02 | <i>Malvaceae</i>        | <i>Sterculia</i>      | <i>pruriens</i>      | 735  |
| 11 | CP-Brazil | CAX-02 | <i>Fabaceae</i>         | <i>Swartzia</i>       | <i>polyphylla</i>    | 739  |
| 11 | CP-Brazil | CAX-02 | <i>Burseraceae</i>      | <i>Protium</i>        | <i>paniculatum</i>   | 275  |
| 11 | CP-Brazil | CAX-02 | <i>Burseraceae</i>      | <i>Tetragastris</i>   | <i>panamensis</i>    | 693  |
| 11 | CP-Brazil | CAX-02 | <i>Myristicaceae</i>    | <i>Virola</i>         | <i>michelii</i>      | 523  |
| 11 | CP-Brazil | CAX-02 | <i>Chrysobalanaceae</i> | <i>Licania</i>        | <i>membranacea</i>   | 894  |
| 11 | CP-Brazil | CAX-02 | <i>Urticaceae</i>       | <i>Pourouma</i>       | <i>indet</i>         | 410  |
| 11 | CP-Brazil | CAX-02 | <i>Lecythidaceae</i>    | <i>Lecythis</i>       | <i>indet</i>         | 815  |
| 11 | CP-Brazil | CAX-02 | <i>indet</i>            | <i>indet</i>          | <i>indet</i>         | 625  |
| 11 | CP-Brazil | CAX-02 | <i>Lauraceae</i>        | <i>Aiouea</i>         | <i>indet</i>         | 1134 |
| 11 | CP-Brazil | CAX-02 | <i>Violaceae</i>        | <i>Rinorea</i>        | <i>guianensis</i>    | 662  |
| 11 | CP-Brazil | CAX-02 | <i>Lecythidaceae</i>    | <i>Eschweilera</i>    | <i>coriacea</i>      | 744  |
| 11 | CP-Brazil | CAX-02 | <i>Lecythidaceae</i>    | <i>Eschweilera</i>    | <i>coriacea</i>      | 670  |
| 11 | CP-Brazil | CAX-03 | <i>Burseraceae</i>      | <i>Protium</i>        | <i>tenuifolium</i>   | 791  |
| 11 | CP-Brazil | CAX-03 | <i>Burseraceae</i>      | <i>Protium</i>        | <i>tenuifolium</i>   | 649  |
| 11 | CP-Brazil | CAX-03 | <i>Lauraceae</i>        | <i>Ocotea</i>         | <i>tabacifolia</i>   | 568  |
| 11 | CP-Brazil | CAX-03 | <i>Fabaceae</i>         | <i>Swartzia</i>       | <i>racemosa</i>      | 772  |
| 11 | CP-Brazil | CAX-03 | <i>Sapotaceae</i>       | <i>Priourella</i>     | <i>prieurii</i>      | 704  |
| 11 | CP-Brazil | CAX-03 | <i>Chrysobalanaceae</i> | <i>Licania</i>        | <i>octandra</i>      | 871  |
| 11 | CP-Brazil | CAX-03 | <i>Chrysobalanaceae</i> | <i>Licania</i>        | <i>octandra</i>      | 866  |
| 11 | CP-Brazil | CAX-03 | <i>Chrysobalanaceae</i> | <i>Licania</i>        | <i>octandra</i>      | 807  |
| 11 | CP-Brazil | CAX-03 | <i>Chrysobalanaceae</i> | <i>Licania</i>        | <i>octandra</i>      | 807  |
| 11 | CP-Brazil | CAX-03 | <i>Chrysobalanaceae</i> | <i>Licania</i>        | <i>membranacea</i>   | 815  |
| 11 | CP-Brazil | CAX-03 | <i>Chrysobalanaceae</i> | <i>Licania</i>        | <i>latifolia</i>     | 929  |
| 11 | CP-Brazil | CAX-03 | <i>Myristicaceae</i>    | <i>Iryanthera</i>     | <i>juruensis</i>     | 646  |
| 11 | CP-Brazil | CAX-03 | <i>Aquifoliaceae</i>    | <i>Ilex</i>           | <i>inundata</i>      | 798  |
| 11 | CP-Brazil | CAX-03 | <i>indet</i>            | <i>indet</i>          | <i>indet</i>         | 800  |
| 11 | CP-Brazil | CAX-03 | <i>Annonaceae</i>       | <i>Ephedranthus</i>   | <i>indet</i>         | 783  |
| 11 | CP-Brazil | CAX-03 | <i>Annonaceae</i>       | <i>Ephedranthus</i>   | <i>indet</i>         | 616  |
| 11 | CP-Brazil | CAX-03 | <i>Sapotaceae</i>       | <i>Manilkara</i>      | <i>huberi</i>        | 769  |
| 11 | CP-Brazil | CAX-03 | <i>Chrysobalanaceae</i> | <i>Licania</i>        | <i>heteromorpha</i>  | 971  |
| 11 | CP-Brazil | CAX-03 | <i>Chrysobalanaceae</i> | <i>Licania</i>        | <i>heteromorpha</i>  | 841  |
| 11 | CP-Brazil | CAX-03 | <i>Violaceae</i>        | <i>Rinorea</i>        | <i>guianensis</i>    | 773  |
| 11 | CP-Brazil | CAX-03 | <i>Violaceae</i>        | <i>Rinorea</i>        | <i>guianensis</i>    | 742  |
| 11 | CP-Brazil | CAX-03 | <i>Lecythidaceae</i>    | <i>Eschweilera</i>    | <i>grandiflora</i>   | 920  |
| 11 | CP-Brazil | CAX-03 | <i>Lecythidaceae</i>    | <i>Eschweilera</i>    | <i>grandiflora</i>   | 720  |
| 11 | CP-Brazil | CAX-03 | <i>Burseraceae</i>      | <i>Crepidospermum</i> | <i>goudotianum</i>   | 684  |
| 11 | CP-Brazil | CAX-03 | <i>Sapotaceae</i>       | <i>Pouteria</i>       | <i>gongrijpii</i>    | 779  |
| 11 | CP-Brazil | CAX-03 | <i>Moraceae</i>         | <i>Naucleopsis</i>    | <i>glabra</i>        | 958  |
| 11 | CP-Brazil | CAX-03 | <i>Annonaceae</i>       | <i>Duguetia</i>       | <i>echinophora</i>   | 927  |
| 11 | CP-Brazil | CAX-03 | <i>Sapotaceae</i>       | <i>Pouteria</i>       | <i>decorticans</i>   | 861  |
| 11 | CP-Brazil | CAX-03 | <i>Sapotaceae</i>       | <i>Pouteria</i>       | <i>decorticans</i>   | 545  |
| 11 | CP-Brazil | CAX-03 | <i>Burseraceae</i>      | <i>Protium</i>        | <i>decandrum</i>     | 689  |
| 11 | CP-Brazil | CAX-03 | <i>Chrysobalanaceae</i> | <i>Licania</i>        | <i>canescens</i>     | 866  |
| 11 | CP-Brazil | CAX-03 | <i>Sapotaceae</i>       | <i>Manilkara</i>      | <i>bidentata</i>     | 858  |
| 11 | CP-Brazil | CAX-03 | <i>Sapotaceae</i>       | <i>Manilkara</i>      | <i>bidentata</i>     | 796  |
| 11 | CP-Brazil | CAX-03 | <i>Sapotaceae</i>       | <i>Pouteria</i>       | <i>anomala</i>       | 770  |
| 11 | CP-Brazil | CAX-03 | <i>Sapotaceae</i>       | <i>Pouteria</i>       | <i>anomala</i>       | 497  |
| 11 | CP-Brazil | CAX-03 | <i>Fabaceae</i>         | <i>Vouacapoua</i>     | <i>americana</i>     | 908  |
| 11 | CP-Brazil | CAX-03 | <i>Fabaceae</i>         | <i>Vouacapoua</i>     | <i>americana</i>     | 787  |
| 11 | CP-Brazil | CAX-03 | <i>Fabaceae</i>         | <i>Vouacapoua</i>     | <i>americana</i>     | 752  |
| 11 | CP-Brazil | CAX-04 | <i>Sapotaceae</i>       | <i>Pouteria</i>       | <i>trilocularis</i>  | 895  |

|    |           |        |                         |                      |                      |      |
|----|-----------|--------|-------------------------|----------------------|----------------------|------|
| 11 | CP-Brazil | CAX-04 | <i>Burseraceae</i>      | <i>Protium</i>       | <i>tenuifolium</i>   | 576  |
| 11 | CP-Brazil | CAX-04 | <i>Rubiaceae</i>        | <i>Stachyarrhena</i> | <i>spicata</i>       | 844  |
| 11 | CP-Brazil | CAX-04 | <i>Fabaceae</i>         | <i>Swartzia</i>      | <i>racemosa</i>      | 783  |
| 11 | CP-Brazil | CAX-04 | <i>Sapotaceae</i>       | <i>Priourella</i>    | <i>prieurii</i>      | 828  |
| 11 | CP-Brazil | CAX-04 | <i>Lauraceae</i>        | <i>Ocotea</i>        | <i>petalanthera</i>  | 710  |
| 11 | CP-Brazil | CAX-04 | <i>Burseraceae</i>      | <i>Protium</i>       | <i>paniculatum</i>   | 804  |
| 11 | CP-Brazil | CAX-04 | <i>Burseraceae</i>      | <i>Tetragastris</i>  | <i>panamensis</i>    | 740  |
| 11 | CP-Brazil | CAX-04 | <i>Chrysobalanaceae</i> | <i>Licania</i>       | <i>kunthiana</i>     | 860  |
| 11 | CP-Brazil | CAX-04 | <i>Rubiaceae</i>        | <i>Stachyarrhena</i> | <i>indet</i>         | 858  |
| 11 | CP-Brazil | CAX-04 | <i>Sapotaceae</i>       | <i>Pouteria</i>      | <i>indet</i>         | 821  |
| 11 | CP-Brazil | CAX-04 | <i>Indet</i>            | <i>indet</i>         | <i>indet</i>         | 895  |
| 11 | CP-Brazil | CAX-04 | <i>indet</i>            | <i>indet</i>         | <i>indet</i>         | 860  |
| 11 | CP-Brazil | CAX-04 | <i>Olacaceae</i>        | <i>Aptandra</i>      | <i>indet</i>         | 754  |
| 11 | CP-Brazil | CAX-04 | <i>Lecythidaceae</i>    | <i>Lecythis</i>      | <i>idatimon</i>      | 743  |
| 11 | CP-Brazil | CAX-04 | <i>Olacaceae</i>        | <i>Minquartia</i>    | <i>guianensis</i>    | 1079 |
| 11 | CP-Brazil | CAX-04 | <i>Olacaceae</i>        | <i>Minquartia</i>    | <i>guianensis</i>    | 965  |
| 11 | CP-Brazil | CAX-04 | <i>Olacaceae</i>        | <i>Minquartia</i>    | <i>guianensis</i>    | 878  |
| 11 | CP-Brazil | CAX-04 | <i>Olacaceae</i>        | <i>Minquartia</i>    | <i>guianensis</i>    | 844  |
| 11 | CP-Brazil | CAX-04 | <i>Melastomataceae</i>  | <i>Mouriri</i>       | <i>duckeana</i>      | 836  |
| 11 | CP-Brazil | CAX-04 | <i>Lecythidaceae</i>    | <i>Eschweilera</i>   | <i>decolorans</i>    | 552  |
| 11 | CP-Brazil | CAX-04 | <i>Burseraceae</i>      | <i>Protium</i>       | <i>decandrum</i>     | 717  |
| 11 | CP-Brazil | CAX-04 | <i>Lecythidaceae</i>    | <i>Eschweilera</i>   | <i>coriacea</i>      | 823  |
| 11 | CP-Brazil | CAX-04 | <i>Lecythidaceae</i>    | <i>Eschweilera</i>   | <i>coriacea</i>      | 679  |
| 11 | CP-Brazil | CAX-04 | <i>Lecythidaceae</i>    | <i>Lecythis</i>      | <i>confertiflora</i> | 776  |
| 11 | CP-Brazil | CAX-04 | <i>Ochnaceae</i>        | <i>Ouratea</i>       | <i>castaneifolia</i> | 819  |
| 11 | CP-Brazil | CAX-04 | <i>Ochnaceae</i>        | <i>Ouratea</i>       | <i>castaneifolia</i> | 659  |
| 11 | CP-Brazil | CAX-04 | <i>Sapotaceae</i>       | <i>Manilkara</i>     | <i>bidentata</i>     | 792  |
| 11 | CP-Brazil | CAX-04 | <i>Chrysobalanaceae</i> | <i>Hirtella</i>      | <i>bicornis</i>      | 843  |
| 11 | CP-Brazil | CAX-04 | <i>Lauraceae</i>        | <i>Licaria</i>       | <i>armeniaca</i>     | 829  |
| 11 | CP-Brazil | CAX-04 | <i>Lauraceae</i>        | <i>Licaria</i>       | <i>armeniaca</i>     | 775  |
| 11 | CP-Brazil | CAX-04 | <i>Sapotaceae</i>       | <i>Pouteria</i>      | <i>anomala</i>       | 658  |
| 11 | CP-Brazil | CAX-05 | <i>Fabaceae</i>         | <i>Newtonia</i>      | <i>suaveolens</i>    | 795  |
| 11 | CP-Brazil | CAX-05 | <i>Moraceae</i>         | <i>Brosimum</i>      | <i>rubescens</i>     | 580  |
| 11 | CP-Brazil | CAX-05 | <i>Lauraceae</i>        | <i>Nectandra</i>     | <i>pulverulenta</i>  | 680  |
| 11 | CP-Brazil | CAX-05 | <i>Burseraceae</i>      | <i>Protium</i>       | <i>pilosissimum</i>  | 635  |
| 11 | CP-Brazil | CAX-05 | <i>Chrysobalanaceae</i> | <i>Licania</i>       | <i>octandra</i>      | 734  |
| 11 | CP-Brazil | CAX-05 | <i>Fabaceae</i>         | <i>Crudia</i>        | <i>oblonga</i>       | 842  |
| 11 | CP-Brazil | CAX-05 | <i>Fabaceae</i>         | <i>Crudia</i>        | <i>oblonga</i>       | 823  |
| 11 | CP-Brazil | CAX-05 | <i>Fabaceae</i>         | <i>Crudia</i>        | <i>oblonga</i>       | 681  |
| 11 | CP-Brazil | CAX-05 | <i>Fabaceae</i>         | <i>Inga</i>          | <i>indet</i>         | 613  |
| 11 | CP-Brazil | CAX-05 | <i>Indet</i>            | <i>Indet</i>         | <i>Indet</i>         | 783  |
| 11 | CP-Brazil | CAX-05 | <i>Indet</i>            | <i>Indet</i>         | <i>Indet</i>         | 776  |
| 11 | CP-Brazil | CAX-05 | <i>Indet</i>            | <i>Indet</i>         | <i>Indet</i>         | 761  |
| 11 | CP-Brazil | CAX-05 | <i>Myrtaceae</i>        | <i>Eugenia</i>       | <i>indet</i>         | 687  |
| 11 | CP-Brazil | CAX-05 | <i>Lecythidaceae</i>    | <i>Lecythis</i>      | <i>idatimon</i>      | 709  |
| 11 | CP-Brazil | CAX-05 | <i>Sapotaceae</i>       | <i>Pouteria</i>      | <i>guianensis</i>    | 881  |
| 11 | CP-Brazil | CAX-05 | <i>Sapotaceae</i>       | <i>Pouteria</i>      | <i>guianensis</i>    | 638  |
| 11 | CP-Brazil | CAX-05 | <i>Lecythidaceae</i>    | <i>Eschweilera</i>   | <i>grandiflora</i>   | 706  |
| 11 | CP-Brazil | CAX-05 | <i>Lecythidaceae</i>    | <i>Eschweilera</i>   | <i>coriacea</i>      | 818  |
| 11 | CP-Brazil | CAX-05 | <i>Myristicaceae</i>    | <i>Virola</i>        | <i>calophylla</i>    | 792  |
| 11 | CP-Brazil | JRI-01 | <i>Bignoniaceae</i>     | <i>Tabebuia</i>      | <i>serratifolia</i>  | 783  |
| 11 | CP-Brazil | JRI-01 | <i>Myristicaceae</i>    | <i>Virola</i>        | <i>sebifera</i>      | 560  |
| 11 | CP-Brazil | JRI-01 | <i>Fabaceae</i>         | <i>Sclerolobium</i>  | <i>melanocarpum</i>  | 649  |
| 11 | CP-Brazil | JRI-01 | <i>Lecythidaceae</i>    | <i>Eschweilera</i>   | <i>juruensis</i>     | 1049 |

|    |           |        |                         |                      |                      |     |
|----|-----------|--------|-------------------------|----------------------|----------------------|-----|
| 11 | CP-Brazil | JRI-01 | <i>Clusiaceae</i>       | <i>Clusia</i>        | <i>insignis</i>      | 756 |
| 11 | CP-Brazil | JRI-01 | <i>Fabaceae</i>         | <i>Vatairea</i>      | <i>indet</i>         | 885 |
| 11 | CP-Brazil | JRI-01 | <i>Burseraceae</i>      | <i>Protium</i>       | <i>indet</i>         | 543 |
| 11 | CP-Brazil | JRI-01 | <i>Fabaceae</i>         | <i>indet</i>         | <i>indet</i>         | 757 |
| 11 | CP-Brazil | JRI-01 | <i>Sapotaceae</i>       | <i>indet</i>         | <i>indet</i>         | 721 |
| 11 | CP-Brazil | JRI-01 | <i>indet</i>            | <i>indet</i>         | <i>indet</i>         | 709 |
| 11 | CP-Brazil | JRI-01 | <i>indet</i>            | <i>indet</i>         | <i>indet</i>         | 650 |
| 11 | CP-Brazil | JRI-01 | <i>Olacaceae</i>        | <i>Minquartia</i>    | <i>guianensis</i>    | 869 |
| 11 | CP-Brazil | JRI-01 | <i>Olacaceae</i>        | <i>Minquartia</i>    | <i>guianensis</i>    | 834 |
| 11 | CP-Brazil | JRI-01 | <i>Olacaceae</i>        | <i>Minquartia</i>    | <i>guianensis</i>    | 832 |
| 11 | CP-Brazil | JRI-01 | <i>Olacaceae</i>        | <i>Minquartia</i>    | <i>guianensis</i>    | 787 |
| 11 | CP-Brazil | JRI-01 | <i>Myrtaceae</i>        | <i>Myrcia</i>        | <i>floribunda</i>    | 791 |
| 11 | CP-Brazil | JRI-01 | <i>Myrtaceae</i>        | <i>Myrcia</i>        | <i>floribunda</i>    | 734 |
| 11 | CP-Brazil | JRI-01 | <i>Sapotaceae</i>       | <i>Pouteria</i>      | <i>crassifolia</i>   | 687 |
| 11 | CP-Brazil | JRI-01 | <i>Sapotaceae</i>       | <i>Manilkara</i>     | <i>bidentata</i>     | 837 |
| 11 | CP-Brazil | JRI-01 | <i>Sapotaceae</i>       | <i>Manilkara</i>     | <i>bidentata</i>     | 702 |
| 10 | WP-Brazil | TAP-01 | <i>Verbenaceae</i>      | <i>Vitex</i>         | <i>triflora</i>      | 665 |
| 10 | WP-Brazil | TAP-01 | <i>Moraceae</i>         | <i>Maquira</i>       | <i>sclerophylla</i>  | 531 |
| 10 | WP-Brazil | TAP-01 | <i>Fabaceae</i>         | <i>Ormosia</i>       | <i>indet</i>         | 605 |
| 10 | WP-Brazil | TAP-01 | <i>Nyctaginaceae</i>    | <i>Neea</i>          | <i>indet</i>         | 690 |
| 10 | WP-Brazil | TAP-01 | <i>indet</i>            | <i>indet</i>         | <i>indet</i>         | 778 |
| 10 | WP-Brazil | TAP-01 | <i>Burseraceae</i>      | <i>indet</i>         | <i>indet</i>         | 656 |
| 10 | WP-Brazil | TAP-01 | <i>indet</i>            | <i>indet</i>         | <i>indet</i>         | 502 |
| 10 | WP-Brazil | TAP-01 | <i>Chrysobalanaceae</i> | <i>Licania</i>       | <i>heteromorpha</i>  | 892 |
| 10 | WP-Brazil | TAP-01 | <i>Violaceae</i>        | <i>Rinorea</i>       | <i>guianensis</i>    | 723 |
| 10 | WP-Brazil | TAP-01 | <i>Violaceae</i>        | <i>Rinorea</i>       | <i>guianensis</i>    | 667 |
| 10 | WP-Brazil | TAP-01 | <i>Violaceae</i>        | <i>Rinorea</i>       | <i>guianensis</i>    | 649 |
| 10 | WP-Brazil | TAP-01 | <i>Violaceae</i>        | <i>Rinorea</i>       | <i>guianensis</i>    | 632 |
| 10 | WP-Brazil | TAP-01 | <i>Fabaceae</i>         | <i>Sclerolobium</i>  | <i>chrysophyllum</i> | 725 |
| 10 | WP-Brazil | TAP-01 | <i>Fabaceae</i>         | <i>Sclerolobium</i>  | <i>chrysophyllum</i> | 718 |
| 10 | WP-Brazil | TAP-01 | <i>Bixaceae</i>         | <i>Bixa</i>          | <i>arborea</i>       | 409 |
| 10 | WP-Brazil | TAP-01 | <i>Burseraceae</i>      | <i>Protium</i>       | <i>apiculatum</i>    | 704 |
| 10 | WP-Brazil | TAP-02 | <i>Lecythidaceae</i>    | <i>Eschweilera</i>   | <i>odora</i>         | 716 |
| 10 | WP-Brazil | TAP-02 | <i>Fabaceae</i>         | <i>Tachigali</i>     | <i>myrmecophila</i>  | 572 |
| 10 | WP-Brazil | TAP-02 | <i>Sapindaceae</i>      | <i>Talisia</i>       | <i>longifolia</i>    | 784 |
| 10 | WP-Brazil | TAP-02 | <i>Lauraceae</i>        | <i>Mezilaurus</i>    | <i>lindaviana</i>    | 864 |
| 10 | WP-Brazil | TAP-02 | <i>Fabaceae</i>         | <i>Tachigali</i>     | <i>indet</i>         | 717 |
| 10 | WP-Brazil | TAP-02 | <i>Fabaceae</i>         | <i>Inga</i>          | <i>indet</i>         | 751 |
| 10 | WP-Brazil | TAP-02 | <i>Lauraceae</i>        | <i>indet</i>         | <i>indet</i>         | 877 |
| 10 | WP-Brazil | TAP-02 | <i>Sapotaceae</i>       | <i>indet</i>         | <i>indet</i>         | 673 |
| 10 | WP-Brazil | TAP-02 | <i>indet</i>            | <i>indet</i>         | <i>indet</i>         | 586 |
| 10 | WP-Brazil | TAP-02 | <i>Sapotaceae</i>       | <i>indet</i>         | <i>indet</i>         | 547 |
| 10 | WP-Brazil | TAP-02 | <i>Lecythidaceae</i>    | <i>Eschweilera</i>   | <i>indet</i>         | 726 |
| 10 | WP-Brazil | TAP-02 | <i>Lecythidaceae</i>    | <i>Eschweilera</i>   | <i>indet</i>         | 726 |
| 10 | WP-Brazil | TAP-02 | <i>Violaceae</i>        | <i>Rinorea</i>       | <i>guianensis</i>    | 713 |
| 10 | WP-Brazil | TAP-02 | <i>Violaceae</i>        | <i>Rinorea</i>       | <i>guianensis</i>    | 686 |
| 10 | WP-Brazil | TAP-02 | <i>Olacaceae</i>        | <i>Minquartia</i>    | <i>guianensis</i>    | 918 |
| 10 | WP-Brazil | TAP-02 | <i>Annonaceae</i>       | <i>Duguetia</i>      | <i>echinophora</i>   | 727 |
| 10 | WP-Brazil | TAP-02 | <i>Annonaceae</i>       | <i>Duguetia</i>      | <i>echinophora</i>   | 691 |
| 10 | WP-Brazil | TAP-02 | <i>Simaroubaceae</i>    | <i>Simaba</i>        | <i>cedron</i>        | 729 |
| 10 | WP-Brazil | TAP-02 | <i>Combretaceae</i>     | <i>Terminalia</i>    | <i>amazonia</i>      | 709 |
| 10 | WP-Brazil | TAP-03 | <i>Sapotaceae</i>       | <i>Micropholis</i>   | <i>venulosa</i>      | 666 |
| 10 | WP-Brazil | TAP-03 | <i>Apocynaceae</i>      | <i>Geissospermum</i> | <i>sericeum</i>      | 686 |
| 10 | WP-Brazil | TAP-03 | <i>Moraceae</i>         | <i>Sahagunia</i>     | <i>racemifera</i>    | 758 |



|    |           |        |                        |                     |                      |      |
|----|-----------|--------|------------------------|---------------------|----------------------|------|
| 10 | WP-Brazil | TAP-03 | <i>Moraceae</i>        | <i>Sahagunia</i>    | <i>racemifera</i>    | 654  |
| 10 | WP-Brazil | TAP-03 | <i>Fabaceae</i>        | <i>Inga</i>         | <i>indet</i>         | 737  |
| 10 | WP-Brazil | TAP-03 | <i>Sapotaceae</i>      | <i>indet</i>        | <i>indet</i>         | 729  |
| 10 | WP-Brazil | TAP-03 | <i>indet</i>           | <i>indet</i>        | <i>indet</i>         | 693  |
| 10 | WP-Brazil | TAP-03 | <i>Sapotaceae</i>      | <i>indet</i>        | <i>indet</i>         | 666  |
| 10 | WP-Brazil | TAP-03 | <i>Sapotaceae</i>      | <i>indet</i>        | <i>indet</i>         | 604  |
| 10 | WP-Brazil | TAP-03 | <i>Sapindaceae</i>     | <i>indet</i>        | <i>indet</i>         | 598  |
| 10 | WP-Brazil | TAP-03 | <i>indet</i>           | <i>indet</i>        | <i>indet</i>         | 564  |
| 10 | WP-Brazil | TAP-03 | <i>indet</i>           | <i>indet</i>        | <i>indet</i>         | 563  |
| 10 | WP-Brazil | TAP-03 | <i>Sapotaceae</i>      | <i>Manilkara</i>    | <i>huberi</i>        | 773  |
| 10 | WP-Brazil | TAP-03 | <i>Violaceae</i>       | <i>Rinorea</i>      | <i>guianensis</i>    | 712  |
| 10 | WP-Brazil | TAP-03 | <i>Violaceae</i>       | <i>Rinorea</i>      | <i>guianensis</i>    | 692  |
| 10 | WP-Brazil | TAP-03 | <i>Violaceae</i>       | <i>Rinorea</i>      | <i>guianensis</i>    | 687  |
| 10 | WP-Brazil | TAP-03 | <i>Violaceae</i>       | <i>Rinorea</i>      | <i>guianensis</i>    | 653  |
| 10 | WP-Brazil | TAP-03 | <i>Violaceae</i>       | <i>Rinorea</i>      | <i>guianensis</i>    | 646  |
| 10 | WP-Brazil | TAP-03 | <i>Fabaceae</i>        | <i>Sclerolobium</i> | <i>guianense</i>     | 631  |
| 10 | WP-Brazil | TAP-03 | <i>Lecythidaceae</i>   | <i>Eschweilera</i>  | <i>blanchetiana</i>  | 739  |
| 10 | WP-Brazil | TAP-04 | <i>Sapotaceae</i>      | <i>Ecclinusa</i>    | <i>ramiflora</i>     | 540  |
| 10 | WP-Brazil | TAP-04 | <i>Rubiaceae</i>       | <i>Coussarea</i>    | <i>racemosa</i>      | 649  |
| 10 | WP-Brazil | TAP-04 | <i>Rubiaceae</i>       | <i>Coussarea</i>    | <i>racemosa</i>      | 628  |
| 10 | WP-Brazil | TAP-04 | <i>Rubiaceae</i>       | <i>Coussarea</i>    | <i>racemosa</i>      | 567  |
| 10 | WP-Brazil | TAP-04 | <i>Moraceae</i>        | <i>Helicostylis</i> | <i>pedunculata</i>   | 372  |
| 10 | WP-Brazil | TAP-04 | <i>Moraceae</i>        | <i>Brosimum</i>     | <i>parinarioides</i> | 244  |
| 10 | WP-Brazil | TAP-04 | <i>Myrtaceae</i>       | <i>Eugenia</i>      | <i>omissa</i>        | 740  |
| 10 | WP-Brazil | TAP-04 | <i>Fabaceae</i>        | <i>Tachigali</i>    | <i>myrmecophila</i>  | 705  |
| 10 | WP-Brazil | TAP-04 | <i>Moraceae</i>        | <i>Perebea</i>      | <i>mollis</i>        | 743  |
| 10 | WP-Brazil | TAP-04 | <i>Fabaceae</i>        | <i>Inga</i>         | <i>microcalyx</i>    | 675  |
| 10 | WP-Brazil | TAP-04 | <i>Myristicaceae</i>   | <i>Virola</i>       | <i>michelii</i>      | 1009 |
| 10 | WP-Brazil | TAP-04 | <i>Fabaceae</i>        | <i>Abarema</i>      | <i>mataybifolia</i>  | 516  |
| 10 | WP-Brazil | TAP-04 | <i>Melastomataceae</i> | <i>Miconia</i>      | <i>lepidota</i>      | 698  |
| 10 | WP-Brazil | TAP-04 | <i>Meliaceae</i>       | <i>Trichilia</i>    | <i>indet</i>         | 579  |
| 10 | WP-Brazil | TAP-04 | <i>Lauraceae</i>       | <i>Ocotea</i>       | <i>indet</i>         | 466  |
| 10 | WP-Brazil | TAP-04 | <i>indet</i>           | <i>indet</i>        | <i>indet</i>         | 752  |
| 10 | WP-Brazil | TAP-04 | <i>Sapotaceae</i>      | <i>indet</i>        | <i>indet</i>         | 684  |
| 10 | WP-Brazil | TAP-04 | <i>indet</i>           | <i>indet</i>        | <i>indet</i>         | 580  |
| 10 | WP-Brazil | TAP-04 | <i>indet</i>           | <i>indet</i>        | <i>indet</i>         | 556  |
| 10 | WP-Brazil | TAP-04 | <i>Annonaceae</i>      | <i>Guatteria</i>    | <i>indet</i>         | 622  |
| 10 | WP-Brazil | TAP-04 | <i>Annonaceae</i>      | <i>Guatteria</i>    | <i>indet</i>         | 539  |
| 10 | WP-Brazil | TAP-04 | <i>Sapotaceae</i>      | <i>Manilkara</i>    | <i>huberi</i>        | 793  |
| 10 | WP-Brazil | TAP-04 | <i>Sapotaceae</i>      | <i>Manilkara</i>    | <i>huberi</i>        | 771  |
| 10 | WP-Brazil | TAP-04 | <i>Burseraceae</i>     | <i>Protium</i>      | <i>heptaphyllum</i>  | 620  |
| 10 | WP-Brazil | TAP-04 | <i>Moraceae</i>        | <i>Maquira</i>      | <i>guianensis</i>    | 592  |
| 10 | WP-Brazil | TAP-04 | <i>Fabaceae</i>        | <i>Poecilanthè</i>  | <i>effusa</i>        | 560  |
| 10 | WP-Brazil | TAP-04 | <i>Annonaceae</i>      | <i>Duguetia</i>     | <i>echinophora</i>   | 743  |
| 10 | WP-Brazil | TAP-04 | <i>Monimiaceae</i>     | <i>Siparuna</i>     | <i>decipiens</i>     | 568  |
| 10 | WP-Brazil | TAP-04 | <i>Fabaceae</i>        | <i>Sclerolobium</i> | <i>chrysophyllum</i> | 614  |
| 10 | WP-Brazil | TAP-04 | <i>Sapotaceae</i>      | <i>Pouteria</i>     | <i>caimito</i>       | 731  |
| 10 | WP-Brazil | TAP-04 | <i>Melastomataceae</i> | <i>Mouriri</i>      | <i>brachyanthera</i> | 730  |
| 10 | WP-Brazil | TAP-04 | <i>Burseraceae</i>     | <i>Protium</i>      | <i>apiculatum</i>    | 564  |
| 10 | WP-Brazil | TAP-04 | <i>Burseraceae</i>     | <i>Protium</i>      | <i>apiculatum</i>    | 523  |
| 9  | AM-Brazil | BNT-04 | <i>Lecythidaceae</i>   | <i>Eschweilera</i>  | <i>odora</i>         | 740  |
| 9  | AM-Brazil | BNT-04 | <i>Lecythidaceae</i>   | <i>Eschweilera</i>  | <i>odora</i>         | 718  |
| 9  | AM-Brazil | BNT-04 | <i>Lecythidaceae</i>   | <i>Eschweilera</i>  | <i>odora</i>         | 678  |
| 9  | AM-Brazil | BNT-04 | <i>Lecythidaceae</i>   | <i>Eschweilera</i>  | <i>odora</i>         | 673  |

|   |           |        |                         |                           |                       |     |
|---|-----------|--------|-------------------------|---------------------------|-----------------------|-----|
| 9 | AM-Brazil | BNT-04 | <i>Malvaceae</i>        | <i>Scleronema</i>         | <i>micranthum</i>     | 762 |
| 9 | AM-Brazil | BNT-04 | <i>Lauraceae</i>        | <i>Rhodostemonodaphne</i> | <i>kunthiana</i>      | 636 |
| 9 | AM-Brazil | BNT-04 | <i>indet</i>            | <i>indet</i>              | <i>indet</i>          | 809 |
| 9 | AM-Brazil | BNT-04 | <i>indet</i>            | <i>indet</i>              | <i>indet</i>          | 792 |
| 9 | AM-Brazil | BNT-04 | <i>Meliaceae</i>        | <i>Guarea</i>             | <i>indet</i>          | 785 |
| 9 | AM-Brazil | BNT-04 | <i>Fabaceae</i>         | <i>Dialium</i>            | <i>indet</i>          | 672 |
| 9 | AM-Brazil | BNT-04 | <i>Sapotaceae</i>       | <i>Micropholis</i>        | <i>guyanensis</i>     | 704 |
| 9 | AM-Brazil | BNT-04 | <i>Olacaceae</i>        | <i>Minquartia</i>         | <i>guianensis</i>     | 836 |
| 9 | AM-Brazil | BNT-04 | <i>Chrysobalanaceae</i> | <i>Licania</i>            | <i>canescens</i>      | 785 |
| 9 | AM-Brazil | BNT-04 | <i>Fabaceae</i>         | <i>Inga</i>               | <i>brevialata</i>     | 772 |
| 9 | AM-Brazil | BNT-04 | <i>Lecythidaceae</i>    | <i>Gustavia</i>           | <i>augusta</i>        | 719 |
| 9 | AM-Brazil | BNT-04 | <i>Burseraceae</i>      | <i>Protium</i>            | <i>aracouchini</i>    | 703 |
| 9 | AM-Brazil | BNT-04 | <i>Lecythidaceae</i>    | <i>Corythophora</i>       | <i>alta</i>           | 767 |
| 9 | AM-Brazil | BNT-04 | <i>Lecythidaceae</i>    | <i>Corythophora</i>       | <i>alta</i>           | 754 |
| 9 | AM-Brazil | BNT-04 | <i>Lecythidaceae</i>    | <i>Corythophora</i>       | <i>alta</i>           | 727 |
| 9 | AM-Brazil | BNT-04 | <i>Lecythidaceae</i>    | <i>Corythophora</i>       | <i>alta</i>           | 717 |
| 9 | AM-Brazil | BNT-04 | <i>Lecythidaceae</i>    | <i>Corythophora</i>       | <i>alta</i>           | 716 |
| 9 | AM-Brazil | MAN-01 | <i>Moraceae</i>         | <i>Maquira</i>            | <i>sclerophylla</i>   | 716 |
| 9 | AM-Brazil | MAN-01 | <i>Moraceae</i>         | <i>Maquira</i>            | <i>sclerophylla</i>   | 618 |
| 9 | AM-Brazil | MAN-01 | <i>Violaceae</i>        | <i>Rinorea</i>            | <i>paniculata</i>     | 646 |
| 9 | AM-Brazil | MAN-01 | <i>Burseraceae</i>      | <i>Tetragastris</i>       | <i>panamensis</i>     | 713 |
| 9 | AM-Brazil | MAN-01 | <i>Meliaceae</i>        | <i>Trichilia</i>          | <i>micropetala</i>    | 788 |
| 9 | AM-Brazil | MAN-01 | <i>Lecythidaceae</i>    | <i>Eschweilera</i>        | <i>micrantha</i>      | 571 |
| 9 | AM-Brazil | MAN-01 | <i>Lauraceae</i>        | <i>Mezilaurus</i>         | <i>itauba</i>         | 785 |
| 9 | AM-Brazil | MAN-01 | <i>indet</i>            | <i>indet</i>              | <i>indet</i>          | 638 |
| 9 | AM-Brazil | MAN-01 | <i>Burseraceae</i>      | <i>Protium</i>            | <i>hebetatum</i>      | 758 |
| 9 | AM-Brazil | MAN-01 | <i>Sapotaceae</i>       | <i>Pouteria</i>           | <i>guianensis</i>     | 733 |
| 9 | AM-Brazil | MAN-01 | <i>Olacaceae</i>        | <i>Minquartia</i>         | <i>guianensis</i>     | 630 |
| 9 | AM-Brazil | MAN-01 | <i>Fabaceae</i>         | <i>Sclerolobium</i>       | <i>guianense</i>      | 670 |
| 9 | AM-Brazil | MAN-01 | <i>Sapotaceae</i>       | <i>Pouteria</i>           | <i>gongrijpii</i>     | 682 |
| 9 | AM-Brazil | MAN-02 | <i>Fabaceae</i>         | <i>Swartzia</i>           | <i>ulei</i>           | 750 |
| 9 | AM-Brazil | MAN-02 | <i>Myristicaceae</i>    | <i>Osteophloeum</i>       | <i>platyspermum</i>   | 548 |
| 9 | AM-Brazil | MAN-02 | <i>Annonaceae</i>       | <i>Rollinia</i>           | <i>insignis</i>       | 505 |
| 9 | AM-Brazil | MAN-02 | <i>indet</i>            | <i>indet</i>              | <i>indet</i>          | 705 |
| 9 | AM-Brazil | MAN-02 | <i>Lecythidaceae</i>    | <i>Eschweilera</i>        | <i>bracteosa</i>      | 741 |
| 9 | AM-Brazil | MAN-02 | <i>Sapotaceae</i>       | <i>Chrysophyllum</i>      | <i>balata</i>         | 586 |
| 9 | AM-Brazil | MAN-03 | <i>Malvaceae</i>        | <i>Scleronema</i>         | <i>micranthum</i>     | 656 |
| 9 | AM-Brazil | MAN-03 | <i>Fabaceae</i>         | <i>Swartzia</i>           | <i>indet</i>          | 719 |
| 9 | AM-Brazil | MAN-03 | <i>Fabaceae</i>         | <i>Swartzia</i>           | <i>indet</i>          | 715 |
| 9 | AM-Brazil | MAN-03 | <i>Fabaceae</i>         | <i>Swartzia</i>           | <i>indet</i>          | 676 |
| 9 | AM-Brazil | MAN-03 | <i>Salicaceae</i>       | <i>Peridiscus</i>         | <i>indet</i>          | 717 |
| 9 | AM-Brazil | MAN-03 | <i>Sapotaceae</i>       | <i>Micropholis</i>        | <i>indet</i>          | 668 |
| 9 | AM-Brazil | MAN-03 | <i>Chrysobalanaceae</i> | <i>Licania</i>            | <i>indet</i>          | 890 |
| 9 | AM-Brazil | MAN-03 | <i>indet</i>            | <i>indet</i>              | <i>indet</i>          | 893 |
| 9 | AM-Brazil | MAN-03 | <i>Annonaceae</i>       | <i>Guatteria</i>          | <i>indet</i>          | 629 |
| 9 | AM-Brazil | MAN-04 | <i>Euphorbiaceae</i>    | <i>Micrandra</i>          | <i>spruceana</i>      | 663 |
| 9 | AM-Brazil | MAN-04 | <i>Verbenaceae</i>      | <i>Vitex</i>              | <i>spongiocarpa</i>   | 653 |
| 9 | AM-Brazil | MAN-04 | <i>Sapotaceae</i>       | <i>Chrysophyllum</i>      | <i>sanguinolentum</i> | 795 |
| 9 | AM-Brazil | MAN-04 | <i>Rutaceae</i>         | <i>Indet</i>              | <i>indet</i>          | 610 |
| 9 | AM-Brazil | MAN-04 | <i>Sapotaceae</i>       | <i>Ecclinusa</i>          | <i>indet</i>          | 575 |
| 9 | AM-Brazil | MAN-04 | <i>Fabaceae</i>         | <i>Parkia</i>             | <i>igneiflora</i>     | 590 |
| 9 | AM-Brazil | MAN-04 | <i>Clusiaceae</i>       | <i>Caraipa</i>            | <i>grandifolia</i>    | 719 |
| 9 | AM-Brazil | MAN-04 | <i>Fabaceae</i>         | <i>Eperua</i>             | <i>glabriflora</i>    | 717 |
| 9 | AM-Brazil | MAN-04 | <i>Verbenaceae</i>      | <i>Vitex</i>              | <i>duckei</i>         | 674 |

|   |              |        |                         |                     |                     |      |
|---|--------------|--------|-------------------------|---------------------|---------------------|------|
| 9 | AM-Brazil    | MAN-04 | <i>Humiriaceae</i>      | <i>Sacoglottis</i>  | <i>ceratocarpa</i>  | 757  |
| 9 | AM-Brazil    | MAN-05 | <i>Burseraceae</i>      | <i>indet</i>        | <i>indet</i>        | 830  |
| 9 | AM-Brazil    | MAN-05 | <i>Sapotaceae</i>       | <i>indet</i>        | <i>indet</i>        | 797  |
| 9 | AM-Brazil    | MAN-05 | <i>Lecythidaceae</i>    | <i>indet</i>        | <i>indet</i>        | 795  |
| 9 | AM-Brazil    | MAN-05 | <i>Lecythidaceae</i>    | <i>indet</i>        | <i>indet</i>        | 789  |
| 9 | AM-Brazil    | MAN-05 | <i>indet</i>            | <i>indet</i>        | <i>indet</i>        | 777  |
| 9 | AM-Brazil    | MAN-05 | <i>indet</i>            | <i>indet</i>        | <i>indet</i>        | 772  |
| 9 | AM-Brazil    | MAN-05 | <i>Euphorbiaceae</i>    | <i>indet</i>        | <i>indet</i>        | 761  |
| 9 | AM-Brazil    | MAN-05 | <i>Lecythidaceae</i>    | <i>indet</i>        | <i>indet</i>        | 752  |
| 9 | AM-Brazil    | MAN-05 | <i>Burseraceae</i>      | <i>indet</i>        | <i>indet</i>        | 724  |
| 9 | AM-Brazil    | MAN-05 | <i>Fabaceae</i>         | <i>indet</i>        | <i>indet</i>        | 703  |
| 9 | AM-Brazil    | MAN-05 | <i>Fabaceae</i>         | <i>indet</i>        | <i>indet</i>        | 695  |
| 9 | AM-Brazil    | MAN-05 | <i>Lecythidaceae</i>    | <i>indet</i>        | <i>indet</i>        | 687  |
| 9 | AM-Brazil    | MAN-05 | <i>Myrtaceae</i>        | <i>indet</i>        | <i>indet</i>        | 679  |
| 9 | AM-Brazil    | MAN-05 | <i>Meliaceae</i>        | <i>indet</i>        | <i>indet</i>        | 660  |
| 9 | AM-Brazil    | MAN-05 | <i>Lecythidaceae</i>    | <i>indet</i>        | <i>indet</i>        | 655  |
| 9 | AM-Brazil    | MAN-05 | <i>Malvaceae</i>        | <i>indet</i>        | <i>indet</i>        | 612  |
| 9 | AM-Brazil    | MAN-05 | <i>Meliaceae</i>        | <i>indet</i>        | <i>indet</i>        | 611  |
| 9 | AM-Brazil    | MAN-05 | <i>Moraceae</i>         | <i>indet</i>        | <i>indet</i>        | 548  |
| 9 | AM-Brazil    | MAN-05 | <i>Bignoniaceae</i>     | <i>indet</i>        | <i>indet</i>        | 539  |
| 9 | AM-Brazil    | MAN-05 | <i>indet</i>            | <i>indet</i>        | <i>indet</i>        | 497  |
| 8 | NE-Venezuela | ELD-12 | <i>Myristicaceae</i>    | <i>Virola</i>       | <i>surinamensis</i> | 465  |
| 8 | NE-Venezuela | ELD-12 | <i>Fabaceae</i>         | <i>Peltogyne</i>    | <i>pubescens</i>    | 724  |
| 8 | NE-Venezuela | ELD-12 | <i>Violaceae</i>        | <i>Paypayrola</i>   | <i>longifolia</i>   | 503  |
| 8 | NE-Venezuela | ELD-12 | <i>indet</i>            | <i>indet</i>        | <i>indet</i>        | 710  |
| 8 | NE-Venezuela | ELD-12 | <i>indet</i>            | <i>indet</i>        | <i>indet</i>        | 396  |
| 8 | NE-Venezuela | ELD-12 | <i>Lauraceae</i>        | <i>Endlicheria</i>  | <i>grandis</i>      | 504  |
| 8 | NE-Venezuela | ELD-12 | <i>Fabaceae</i>         | <i>Eperua</i>       | <i>grandiflora</i>  | 441  |
| 8 | NE-Venezuela | ELD-12 | <i>Fabaceae</i>         | <i>Mora</i>         | <i>gonggrijpii</i>  | 589  |
| 8 | NE-Venezuela | ELD-12 | <i>Fabaceae</i>         | <i>Mora</i>         | <i>gonggrijpii</i>  | 570  |
| 8 | NE-Venezuela | ELD-12 | <i>Fabaceae</i>         | <i>Mora</i>         | <i>gonggrijpii</i>  | 546  |
| 8 | NE-Venezuela | ELD-12 | <i>Fabaceae</i>         | <i>Mora</i>         | <i>gonggrijpii</i>  | 505  |
| 8 | NE-Venezuela | ELD-12 | <i>Apocynaceae</i>      | <i>Aspidosperma</i> | <i>excelsum</i>     | 682  |
| 8 | NE-Venezuela | ELD-12 | <i>Rubiaceae</i>        | <i>Duroia</i>       | <i>eriopila</i>     | 629  |
| 8 | NE-Venezuela | ELD-12 | <i>Rubiaceae</i>        | <i>Duroia</i>       | <i>eriopila</i>     | 602  |
| 8 | NE-Venezuela | ELD-12 | <i>Burseraceae</i>      | <i>Protium</i>      | <i>decandrum</i>    | 593  |
| 8 | NE-Venezuela | ELD-12 | <i>Apocynaceae</i>      | <i>Aspidosperma</i> | <i>album</i>        | 1027 |
| 8 | NE-Venezuela | ELD-34 | <i>Bignoniaceae</i>     | <i>Tabebuia</i>     | <i>stenocalyx</i>   | 415  |
| 8 | NE-Venezuela | ELD-34 | <i>Meliaceae</i>        | <i>Trichilia</i>    | <i>schomburgkii</i> | 733  |
| 8 | NE-Venezuela | ELD-34 | <i>Annonaceae</i>       | <i>Duguetia</i>     | <i>lucida</i>       | 588  |
| 8 | NE-Venezuela | ELD-34 | <i>Fabaceae</i>         | <i>Amerimnon</i>    | <i>latifolium</i>   | 566  |
| 8 | NE-Venezuela | ELD-34 | <i>Fabaceae</i>         | <i>Amerimnon</i>    | <i>latifolium</i>   | 474  |
| 8 | NE-Venezuela | ELD-34 | <i>Fabaceae</i>         | <i>Amerimnon</i>    | <i>latifolium</i>   | 389  |
| 8 | NE-Venezuela | ELD-34 | <i>indet</i>            | <i>indet</i>        | <i>indet</i>        | 590  |
| 8 | NE-Venezuela | ELD-34 | <i>Boraginaceae</i>     | <i>Cordia</i>       | <i>fallax</i>       | 275  |
| 8 | NE-Venezuela | ELD-34 | <i>Apocynaceae</i>      | <i>Aspidosperma</i> | <i>excelsum</i>     | 665  |
| 8 | NE-Venezuela | ELD-34 | <i>Chrysobalanaceae</i> | <i>Licania</i>      | <i>densiflora</i>   | 635  |
| 8 | NE-Venezuela | ELD-34 | <i>Chrysobalanaceae</i> | <i>Licania</i>      | <i>densiflora</i>   | 608  |
| 8 | NE-Venezuela | ELD-34 | <i>Lecythidaceae</i>    | <i>Eschweilera</i>  | <i>decolorans</i>   | 583  |
| 8 | NE-Venezuela | ELD-34 | <i>Burseraceae</i>      | <i>Protium</i>      | <i>decandrum</i>    | 454  |
| 8 | NE-Venezuela | ELD-34 | <i>Burseraceae</i>      | <i>Protium</i>      | <i>decandrum</i>    | 395  |
| 8 | NE-Venezuela | ELD-34 | <i>Fabaceae</i>         | <i>Inga</i>         | <i>capitata</i>     | 587  |
| 8 | NE-Venezuela | ELD-34 | <i>Malpighiaceae</i>    | <i>Byrsonima</i>    | <i>aerugo</i>       | 482  |
| 8 | NE-Venezuela | RIO-12 | <i>Fabaceae</i>         | <i>Peltogyne</i>    | <i>pubescens</i>    | 542  |

|   |              |        |                         |                      |                      |     |
|---|--------------|--------|-------------------------|----------------------|----------------------|-----|
| 8 | NE-Venezuela | RIO-12 | <i>Myrtaceae</i>        | <i>Eugenia</i>       | <i>pseudopsidium</i> | 749 |
| 8 | NE-Venezuela | RIO-12 | <i>indet</i>            | <i>indet</i>         | <i>indet</i>         | 572 |
| 8 | NE-Venezuela | RIO-12 | <i>indet</i>            | <i>indet</i>         | <i>indet</i>         | 461 |
| 8 | NE-Venezuela | RIO-12 | <i>indet</i>            | <i>indet</i>         | <i>indet</i>         | 370 |
| 8 | NE-Venezuela | RIO-12 | <i>Dichapetalaceae</i>  | <i>Tapura</i>        | <i>guianensis</i>    | 478 |
| 8 | NE-Venezuela | RIO-12 | <i>Lecythidaceae</i>    | <i>Eschweilera</i>   | <i>grata</i>         | 638 |
| 8 | NE-Venezuela | RIO-12 | <i>Lecythidaceae</i>    | <i>Eschweilera</i>   | <i>grata</i>         | 585 |
| 8 | NE-Venezuela | RIO-12 | <i>Chrysobalanaceae</i> | <i>Licania</i>       | <i>densiflora</i>    | 783 |
| 8 | NE-Venezuela | RIO-12 | <i>Lecythidaceae</i>    | <i>Eschweilera</i>   | <i>decolorans</i>    | 650 |
| 8 | NE-Venezuela | RIO-12 | <i>Lecythidaceae</i>    | <i>Eschweilera</i>   | <i>decolorans</i>    | 617 |
| 8 | NE-Venezuela | RIO-12 | <i>Lecythidaceae</i>    | <i>Eschweilera</i>   | <i>decolorans</i>    | 610 |
| 8 | NE-Venezuela | RIO-12 | <i>Lecythidaceae</i>    | <i>Eschweilera</i>   | <i>decolorans</i>    | 553 |
| 8 | NE-Venezuela | RIO-12 | <i>Lecythidaceae</i>    | <i>Eschweilera</i>   | <i>decolorans</i>    | 519 |
| 8 | NE-Venezuela | RIO-12 | <i>Fabaceae</i>         | <i>Clathrotropis</i> | <i>brachypetala</i>  | 672 |
| 8 | NE-Venezuela | RIO-12 | <i>Sapotaceae</i>       | <i>Chrysophyllum</i> | <i>auratum</i>       | 692 |
| 8 | NE-Venezuela | RIO-12 | <i>Burseraceae</i>      | <i>Tetragastris</i>  | <i>altissima</i>     | 512 |
| 8 | NE-Venezuela | RIO-12 | <i>Burseraceae</i>      | <i>Tetragastris</i>  | <i>altissima</i>     | 489 |
| 8 | NE-Venezuela | RIO-12 | <i>Chrysobalanaceae</i> | <i>Licania</i>       | <i>alba</i>          | 565 |
| 7 | SW-Venezuela | SCR-01 | <i>Fabaceae</i>         | <i>Aldina</i>        | <i>kunhardtiana</i>  | 579 |
| 7 | SW-Venezuela | SCR-01 | <i>Fabaceae</i>         | <i>Aldina</i>        | <i>kunhardtiana</i>  | 543 |
| 7 | SW-Venezuela | SCR-01 | <i>Burseraceae</i>      | <i>Protium</i>       | <i>indet</i>         | 619 |
| 7 | SW-Venezuela | SCR-01 | <i>Sapotaceae</i>       | <i>Pouteria</i>      | <i>indet</i>         | 540 |
| 7 | SW-Venezuela | SCR-01 | <i>Lauraceae</i>        | <i>Ocotea</i>        | <i>indet</i>         | 778 |
| 7 | SW-Venezuela | SCR-01 | <i>Lauraceae</i>        | <i>Ocotea</i>        | <i>indet</i>         | 681 |
| 7 | SW-Venezuela | SCR-01 | <i>Lauraceae</i>        | <i>Ocotea</i>        | <i>indet</i>         | 583 |
| 7 | SW-Venezuela | SCR-01 | <i>Lauraceae</i>        | <i>Ocotea</i>        | <i>indet</i>         | 530 |
| 7 | SW-Venezuela | SCR-01 | <i>Lauraceae</i>        | <i>Ocotea</i>        | <i>indet</i>         | 514 |
| 7 | SW-Venezuela | SCR-01 | <i>Euphorbiaceae</i>    | <i>Micrandra</i>     | <i>indet</i>         | 644 |
| 7 | SW-Venezuela | SCR-01 | <i>Chrysobalanaceae</i> | <i>Licania</i>       | <i>indet</i>         | 751 |
| 7 | SW-Venezuela | SCR-01 | <i>Chrysobalanaceae</i> | <i>Licania</i>       | <i>indet</i>         | 728 |
| 7 | SW-Venezuela | SCR-01 | <i>indet</i>            | <i>indet</i>         | <i>indet</i>         | 818 |
| 7 | SW-Venezuela | SCR-01 | <i>indet</i>            | <i>indet</i>         | <i>indet</i>         | 666 |
| 7 | SW-Venezuela | SCR-01 | <i>Annonaceae</i>       | <i>indet</i>         | <i>indet</i>         | 635 |
| 7 | SW-Venezuela | SCR-01 | <i>indet</i>            | <i>indet</i>         | <i>indet</i>         | 599 |
| 7 | SW-Venezuela | SCR-01 | <i>Fabaceae</i>         | <i>indet</i>         | <i>indet</i>         | 560 |
| 7 | SW-Venezuela | SCR-01 | <i>indet</i>            | <i>indet</i>         | <i>indet</i>         | 500 |
| 7 | SW-Venezuela | SCR-01 | <i>Chrysobalanaceae</i> | <i>Couepia</i>       | <i>indet</i>         | 946 |
| 7 | SW-Venezuela | SCR-01 | <i>Apocynaceae</i>      | <i>Aspidosperma</i>  | <i>indet</i>         | 691 |
| 7 | SW-Venezuela | SCR-01 | <i>Chrysobalanaceae</i> | <i>Licania</i>       | <i>heteromorpha</i>  | 800 |
| 7 | SW-Venezuela | SCR-04 | <i>Euphorbiaceae</i>    | <i>Micrandra</i>     | <i>sprucei</i>       | 657 |
| 7 | SW-Venezuela | SCR-04 | <i>Euphorbiaceae</i>    | <i>Micrandra</i>     | <i>sprucei</i>       | 636 |
| 7 | SW-Venezuela | SCR-04 | <i>Euphorbiaceae</i>    | <i>Micrandra</i>     | <i>sprucei</i>       | 578 |
| 7 | SW-Venezuela | SCR-04 | <i>Euphorbiaceae</i>    | <i>Micrandra</i>     | <i>sprucei</i>       | 481 |
| 7 | SW-Venezuela | SCR-04 | <i>Sapotaceae</i>       | <i>Micropholis</i>   | <i>splendens</i>     | 418 |
| 7 | SW-Venezuela | SCR-04 | <i>Sapotaceae</i>       | <i>Micropholis</i>   | <i>maguirei</i>      | 505 |
| 7 | SW-Venezuela | SCR-04 | <i>Sapotaceae</i>       | <i>Micropholis</i>   | <i>maguirei</i>      | 501 |
| 7 | SW-Venezuela | SCR-04 | <i>Sapotaceae</i>       | <i>Micropholis</i>   | <i>maguirei</i>      | 439 |
| 7 | SW-Venezuela | SCR-04 | <i>Fabaceae</i>         | <i>Macrolobium</i>   | <i>limbatum</i>      | 545 |
| 7 | SW-Venezuela | SCR-04 | <i>Fabaceae</i>         | <i>Eperua</i>        | <i>leucantha</i>     | 612 |
| 7 | SW-Venezuela | SCR-04 | <i>Fabaceae</i>         | <i>Eperua</i>        | <i>leucantha</i>     | 593 |
| 7 | SW-Venezuela | SCR-04 | <i>Fabaceae</i>         | <i>Eperua</i>        | <i>leucantha</i>     | 524 |
| 7 | SW-Venezuela | SCR-04 | <i>Fabaceae</i>         | <i>Eperua</i>        | <i>leucantha</i>     | 510 |
| 7 | SW-Venezuela | SCR-04 | <i>Fabaceae</i>         | <i>Aldina</i>        | <i>kunhardtiana</i>  | 594 |
| 7 | SW-Venezuela | SCR-04 | <i>Fabaceae</i>         | <i>Aldina</i>        | <i>kunhardtiana</i>  | 491 |

|   |              |        |                         |                      |                       |     |
|---|--------------|--------|-------------------------|----------------------|-----------------------|-----|
| 7 | SW-Venezuela | SCR-04 | <i>Myristicaceae</i>    | <i>Virola</i>        | <i>indet</i>          | 764 |
| 7 | SW-Venezuela | SCR-04 | <i>Myristicaceae</i>    | <i>Virola</i>        | <i>indet</i>          | 586 |
| 7 | SW-Venezuela | SCR-04 | <i>Elaeocarpaceae</i>   | <i>Sloanea</i>       | <i>indet</i>          | 699 |
| 7 | SW-Venezuela | SCR-04 | <i>Burseraceae</i>      | <i>Protium</i>       | <i>indet</i>          | 649 |
| 7 | SW-Venezuela | SCR-04 | <i>Burseraceae</i>      | <i>Protium</i>       | <i>indet</i>          | 559 |
| 7 | SW-Venezuela | SCR-04 | <i>Sapotaceae</i>       | <i>Pouteria</i>      | <i>indet</i>          | 692 |
| 7 | SW-Venezuela | SCR-04 | <i>Chrysobalanaceae</i> | <i>Licania</i>       | <i>indet</i>          | 815 |
| 7 | SW-Venezuela | SCR-04 | <i>indet</i>            | <i>indet</i>         | <i>indet</i>          | 692 |
| 7 | SW-Venezuela | SCR-04 | <i>indet</i>            | <i>indet</i>         | <i>indet</i>          | 567 |
| 7 | SW-Venezuela | SCR-04 | <i>Clusiaceae</i>       | <i>Caraipa</i>       | <i>densifolia</i>     | 653 |
| 7 | SW-Venezuela | SCR-04 | <i>Lecythidaceae</i>    | <i>Eschweilera</i>   | <i>bracteosa</i>      | 686 |
| 7 | SW-Venezuela | SCR-05 | <i>Apocynaceae</i>      | <i>Collophora</i>    | <i>utilis</i>         | 372 |
| 7 | SW-Venezuela | SCR-05 | <i>Sapotaceae</i>       | <i>Chrysophyllum</i> | <i>sanguinolentum</i> | 597 |
| 7 | SW-Venezuela | SCR-05 | <i>Fabaceae</i>         | <i>Eperua</i>        | <i>purpurea</i>       | 662 |
| 7 | SW-Venezuela | SCR-05 | <i>Fabaceae</i>         | <i>Eperua</i>        | <i>purpurea</i>       | 459 |
| 7 | SW-Venezuela | SCR-05 | <i>Fabaceae</i>         | <i>Eperua</i>        | <i>leucantha</i>      | 556 |
| 7 | SW-Venezuela | SCR-05 | <i>Fabaceae</i>         | <i>Aldina</i>        | <i>kunhardtiana</i>   | 633 |
| 7 | SW-Venezuela | SCR-05 | <i>Myristicaceae</i>    | <i>Virola</i>        | <i>indet</i>          | 509 |
| 7 | SW-Venezuela | SCR-05 | <i>Myristicaceae</i>    | <i>Virola</i>        | <i>indet</i>          | 491 |
| 7 | SW-Venezuela | SCR-05 | <i>Myristicaceae</i>    | <i>Virola</i>        | <i>indet</i>          | 478 |
| 7 | SW-Venezuela | SCR-05 | <i>Fabaceae</i>         | <i>Tachigali</i>     | <i>indet</i>          | 607 |
| 7 | SW-Venezuela | SCR-05 | <i>Fabaceae</i>         | <i>Tachigali</i>     | <i>indet</i>          | 575 |
| 7 | SW-Venezuela | SCR-05 | <i>Fabaceae</i>         | <i>Tachigali</i>     | <i>indet</i>          | 507 |
| 7 | SW-Venezuela | SCR-05 | <i>Burseraceae</i>      | <i>Protium</i>       | <i>indet</i>          | 647 |
| 7 | SW-Venezuela | SCR-05 | <i>Burseraceae</i>      | <i>Protium</i>       | <i>indet</i>          | 633 |
| 7 | SW-Venezuela | SCR-05 | <i>Sapotaceae</i>       | <i>Pouteria</i>      | <i>indet</i>          | 716 |
| 7 | SW-Venezuela | SCR-05 | <i>Sapotaceae</i>       | <i>Pouteria</i>      | <i>indet</i>          | 663 |
| 7 | SW-Venezuela | SCR-05 | <i>Icacinaceae</i>      | <i>Poraqueiba</i>    | <i>indet</i>          | 498 |
| 7 | SW-Venezuela | SCR-05 | <i>Annonaceae</i>       | <i>Oxandra</i>       | <i>indet</i>          | 573 |
| 7 | SW-Venezuela | SCR-05 | <i>Lauraceae</i>        | <i>Ocotea</i>        | <i>indet</i>          | 569 |
| 7 | SW-Venezuela | SCR-05 | <i>Lecythidaceae</i>    | <i>indet</i>         | <i>indet</i>          | 848 |
| 7 | SW-Venezuela | SCR-05 | <i>indet</i>            | <i>indet</i>         | <i>indet</i>          | 721 |
| 7 | SW-Venezuela | SCR-05 | <i>indet</i>            | <i>indet</i>         | <i>indet</i>          | 680 |
| 7 | SW-Venezuela | SCR-05 | <i>indet</i>            | <i>indet</i>         | <i>indet</i>          | 632 |
| 7 | SW-Venezuela | SCR-05 | <i>indet</i>            | <i>indet</i>         | <i>indet</i>          | 575 |
| 7 | SW-Venezuela | SCR-05 | <i>Sapotaceae</i>       | <i>indet</i>         | <i>indet</i>          | 543 |
| 7 | SW-Venezuela | SCR-05 | <i>indet</i>            | <i>indet</i>         | <i>indet</i>          | 527 |
| 7 | SW-Venezuela | SCR-05 | <i>indet</i>            | <i>indet</i>         | <i>indet</i>          | 493 |
| 7 | SW-Venezuela | SCR-05 | <i>Clusiaceae</i>       | <i>Clusia</i>        | <i>hammeliana</i>     | 743 |
| 7 | SW-Venezuela | SCR-05 | <i>Clusiaceae</i>       | <i>Clusia</i>        | <i>hammeliana</i>     | 636 |
| 7 | SW-Venezuela | SCR-05 | <i>Olacaceae</i>        | <i>Minquartia</i>    | <i>guianensis</i>     | 655 |
| 7 | SW-Venezuela | SCR-05 | <i>Sapotaceae</i>       | <i>Pouteria</i>      | <i>elegans</i>        | 712 |
| 7 | SW-Venezuela | SCR-05 | <i>Sapotaceae</i>       | <i>Pouteria</i>      | <i>elegans</i>        | 422 |
| 7 | SW-Venezuela | SCR-05 | <i>Lecythidaceae</i>    | <i>Eschweilera</i>   | <i>bracteosa</i>      | 697 |
| 7 | SW-Venezuela | SCR-05 | <i>Lecythidaceae</i>    | <i>Eschweilera</i>   | <i>bracteosa</i>      | 630 |
| 6 | Colombia     | AGP-01 | <i>Salicaceae</i>       | <i>Casearia</i>      | <i>sylvestris</i>     | 562 |
| 6 | Colombia     | AGP-01 | <i>Annonaceae</i>       | <i>Unonopsis</i>     | <i>spectabilis</i>    | 450 |
| 6 | Colombia     | AGP-01 | <i>Moraceae</i>         | <i>Sorocea</i>       | <i>pubivena</i>       | 654 |
| 6 | Colombia     | AGP-01 | <i>Meliaceae</i>        | <i>Guarea</i>        | <i>pubescens</i>      | 566 |
| 6 | Colombia     | AGP-01 | <i>indet</i>            | <i>indet</i>         | <i>indet</i>          | 812 |
| 6 | Colombia     | AGP-01 | <i>indet</i>            | <i>indet</i>         | <i>indet</i>          | 646 |
| 6 | Colombia     | AGP-01 | <i>indet</i>            | <i>indet</i>         | <i>indet</i>          | 643 |
| 6 | Colombia     | AGP-01 | <i>Lauraceae</i>        | <i>indet</i>         | <i>indet</i>          | 571 |
| 6 | Colombia     | AGP-01 | <i>indet</i>            | <i>indet</i>         | <i>indet</i>          | 554 |

|   |          |        |                         |                      |                     |     |
|---|----------|--------|-------------------------|----------------------|---------------------|-----|
| 6 | Colombia | AGP-01 | <i>indet</i>            | <i>indet</i>         | <i>indet</i>        | 497 |
| 6 | Colombia | AGP-01 | <i>indet</i>            | <i>indet</i>         | <i>indet</i>        | 354 |
| 6 | Colombia | AGP-01 | <i>Sapotaceae</i>       | <i>Micropholis</i>   | <i>guyanensis</i>   | 473 |
| 6 | Colombia | AGP-01 | <i>Chrysobalanaceae</i> | <i>Licania</i>       | <i>guianensis</i>   | 622 |
| 6 | Colombia | AGP-01 | <i>Chrysobalanaceae</i> | <i>Licania</i>       | <i>guianensis</i>   | 608 |
| 6 | Colombia | AGP-01 | <i>Meliaceae</i>        | <i>Carapa</i>        | <i>guianensis</i>   | 542 |
| 6 | Colombia | AGP-01 | <i>Lecythydaceae</i>    | <i>Eschweilera</i>   | <i>coriacea</i>     | 659 |
| 6 | Colombia | AGP-01 | <i>Lecythydaceae</i>    | <i>Eschweilera</i>   | <i>coriacea</i>     | 573 |
| 6 | Colombia | AGP-01 | <i>Rubiaceae</i>        | <i>Simira</i>        | <i>cordifolia</i>   | 655 |
| 6 | Colombia | AGP-01 | <i>Myristicaceae</i>    | <i>Virola</i>        | <i>calophylla</i>   | 500 |
| 6 | Colombia | AGP-01 | <i>Moraceae</i>         | <i>Perebea</i>       | <i>angustifolia</i> | 540 |
| 6 | Colombia | AGP-02 | <i>Euphorbiaceae</i>    | <i>Nealchornea</i>   | <i>yapurensis</i>   | 581 |
| 6 | Colombia | AGP-02 | <i>Myristicaceae</i>    | <i>Iryanthera</i>    | <i>ulei</i>         | 488 |
| 6 | Colombia | AGP-02 | <i>Chrysobalanaceae</i> | <i>Hirtella</i>      | <i>triandra</i>     | 610 |
| 6 | Colombia | AGP-02 | <i>Malvaceae</i>        | <i>Theobroma</i>     | <i>subincanum</i>   | 479 |
| 6 | Colombia | AGP-02 | <i>Myristicaceae</i>    | <i>Iryanthera</i>    | <i>macrophylla</i>  | 487 |
| 6 | Colombia | AGP-02 | <i>Clusiaceae</i>       | <i>Garcinia</i>      | <i>macrophylla</i>  | 661 |
| 6 | Colombia | AGP-02 | <i>Fabaceae</i>         | <i>Clathrotropis</i> | <i>macrocarpa</i>   | 462 |
| 6 | Colombia | AGP-02 | <i>Elaeocarpaceae</i>   | <i>Sloanea</i>       | <i>laxiflora</i>    | 542 |
| 6 | Colombia | AGP-02 | <i>Chrysobalanaceae</i> | <i>Licania</i>       | <i>lata</i>         | 716 |
| 6 | Colombia | AGP-02 | <i>Moraceae</i>         | <i>Pseudolmedia</i>  | <i>laevis</i>       | 498 |
| 6 | Colombia | AGP-02 | <i>Meliaceae</i>        | <i>Guarea</i>        | <i>kunthiana</i>    | 492 |
| 6 | Colombia | AGP-02 | <i>Lecythydaceae</i>    | <i>Lecythis</i>      | <i>indet</i>        | 541 |
| 6 | Colombia | AGP-02 | <i>Lauraceae</i>        | <i>indet</i>         | <i>indet</i>        | 486 |
| 6 | Colombia | AGP-02 | <i>Euphorbiaceae</i>    | <i>Hyeronima</i>     | <i>indet</i>        | 358 |
| 6 | Colombia | AGP-02 | <i>Moraceae</i>         | <i>Perebea</i>       | <i>guianensis</i>   | 521 |
| 6 | Colombia | AGP-02 | <i>Euphorbiaceae</i>    | <i>Conceveiba</i>    | <i>guianensis</i>   | 524 |
| 6 | Colombia | AGP-02 | <i>Sapotaceae</i>       | <i>Pouteria</i>      | <i>cuspidata</i>    | 696 |
| 6 | Colombia | AGP-02 | <i>Lecythydaceae</i>    | <i>Eschweilera</i>   | <i>coriacea</i>     | 562 |
| 6 | Colombia | AGP-02 | <i>Lecythydaceae</i>    | <i>Eschweilera</i>   | <i>albiflora</i>    | 645 |
| 6 | Colombia | AGP-02 | <i>Lecythydaceae</i>    | <i>Eschweilera</i>   | <i>albiflora</i>    | 558 |
| 6 | Colombia | LOR-01 | <i>Euphorbiaceae</i>    | <i>Nealchornea</i>   | <i>yapurensis</i>   | 584 |
| 6 | Colombia | LOR-01 | <i>Myristicaceae</i>    | <i>Virola</i>        | <i>pavonis</i>      | 574 |
| 6 | Colombia | LOR-01 | <i>Malvaceae</i>        | <i>Theobroma</i>     | <i>obovatum</i>     | 608 |
| 6 | Colombia | LOR-01 | <i>Burseraceae</i>      | <i>Dacryodes</i>     | <i>nitens</i>       | 633 |
| 6 | Colombia | LOR-01 | <i>Fabaceae</i>         | <i>Clathrotropis</i> | <i>macrocarpa</i>   | 606 |
| 6 | Colombia | LOR-01 | <i>Lecythydaceae</i>    | <i>Eschweilera</i>   | <i>itayensis</i>    | 643 |
| 6 | Colombia | LOR-01 | <i>Monimiaceae</i>      | <i>Siparuna</i>      | <i>indet</i>        | 503 |
| 6 | Colombia | LOR-01 | <i>Moraceae</i>         | <i>Naucleopsis</i>   | <i>indet</i>        | 481 |
| 6 | Colombia | LOR-01 | <i>Fabaceae</i>         | <i>indet</i>         | <i>indet</i>        | 708 |
| 6 | Colombia | LOR-01 | <i>indet</i>            | <i>indet</i>         | <i>indet</i>        | 641 |
| 6 | Colombia | LOR-01 | <i>indet</i>            | <i>indet</i>         | <i>indet</i>        | 578 |
| 6 | Colombia | LOR-01 | <i>indet</i>            | <i>indet</i>         | <i>indet</i>        | 569 |
| 6 | Colombia | LOR-01 | <i>indet</i>            | <i>indet</i>         | <i>indet</i>        | 507 |
| 6 | Colombia | LOR-01 | <i>indet</i>            | <i>indet</i>         | <i>indet</i>        | 378 |
| 6 | Colombia | LOR-01 | <i>Burseraceae</i>      | <i>Dacryodes</i>     | <i>indet</i>        | 552 |
| 6 | Colombia | LOR-01 | <i>Lecythydaceae</i>    | <i>Eschweilera</i>   | <i>coriacea</i>     | 683 |
| 6 | Colombia | LOR-01 | <i>Lecythydaceae</i>    | <i>Eschweilera</i>   | <i>coriacea</i>     | 638 |
| 6 | Colombia | LOR-02 | <i>Rubiaceae</i>        | <i>Botryarrhena</i>  | <i>pendula</i>      | 815 |
| 6 | Colombia | LOR-02 | <i>Myristicaceae</i>    | <i>Iryanthera</i>    | <i>paraensis</i>    | 477 |
| 6 | Colombia | LOR-02 | <i>Burseraceae</i>      | <i>Protium</i>       | <i>nodulosum</i>    | 489 |
| 6 | Colombia | LOR-02 | <i>Malvaceae</i>        | <i>Scleronema</i>    | <i>micranthum</i>   | 496 |
| 6 | Colombia | LOR-02 | <i>indet</i>            | <i>indet</i>         | <i>indet</i>        | 644 |
| 6 | Colombia | LOR-02 | <i>indet</i>            | <i>indet</i>         | <i>indet</i>        | 543 |

|   |          |        |                        |                     |                      |     |
|---|----------|--------|------------------------|---------------------|----------------------|-----|
| 6 | Colombia | LOR-02 | <i>indet</i>           | <i>indet</i>        | <i>indet</i>         | 517 |
| 6 | Colombia | LOR-02 | <i>indet</i>           | <i>indet</i>        | <i>indet</i>         | 507 |
| 6 | Colombia | LOR-02 | <i>indet</i>           | <i>indet</i>        | <i>indet</i>         | 498 |
| 6 | Colombia | LOR-02 | <i>indet</i>           | <i>indet</i>        | <i>indet</i>         | 431 |
| 6 | Colombia | LOR-02 | <i>indet</i>           | <i>indet</i>        | <i>indet</i>         | 304 |
| 6 | Colombia | LOR-02 | <i>indet</i>           | <i>indet</i>        | <i>indet</i>         | 277 |
| 6 | Colombia | LOR-02 | <i>Sapotaceae</i>      | <i>Micropholis</i>  | <i>egensis</i>       | 563 |
| 6 | Colombia | LOR-02 | <i>Dichapetalaceae</i> | <i>Tapura</i>       | <i>coriacea</i>      | 421 |
| 6 | Colombia | LOR-02 | <i>Lecythidaceae</i>   | <i>Eschweilera</i>  | <i>coriacea</i>      | 657 |
| 6 | Colombia | LOR-02 | <i>Vochysiaceae</i>    | <i>Erisma</i>       | <i>calcaratum</i>    | 573 |
| 6 | Colombia | ZAR-01 | <i>Apocynaceae</i>     | <i>Aspidosperma</i> | <i>spruceanum</i>    | 847 |
| 6 | Colombia | ZAR-01 | <i>Apocynaceae</i>     | <i>Aspidosperma</i> | <i>spruceanum</i>    | 788 |
| 6 | Colombia | ZAR-01 | <i>Apocynaceae</i>     | <i>Aspidosperma</i> | <i>spruceanum</i>    | 783 |
| 6 | Colombia | ZAR-01 | <i>Apocynaceae</i>     | <i>Aspidosperma</i> | <i>spruceanum</i>    | 783 |
| 6 | Colombia | ZAR-01 | <i>Apocynaceae</i>     | <i>Aspidosperma</i> | <i>spruceanum</i>    | 780 |
| 6 | Colombia | ZAR-01 | <i>Apocynaceae</i>     | <i>Aspidosperma</i> | <i>spruceanum</i>    | 716 |
| 6 | Colombia | ZAR-01 | <i>Apocynaceae</i>     | <i>Aspidosperma</i> | <i>spruceanum</i>    | 669 |
| 6 | Colombia | ZAR-01 | <i>Apocynaceae</i>     | <i>Aspidosperma</i> | <i>spruceanum</i>    | 668 |
| 6 | Colombia | ZAR-01 | <i>Apocynaceae</i>     | <i>Aspidosperma</i> | <i>spruceanum</i>    | 623 |
| 6 | Colombia | ZAR-01 | <i>Icacinaceae</i>     | <i>Poraqueiba</i>   | <i>sericea</i>       | 729 |
| 6 | Colombia | ZAR-01 | <i>Icacinaceae</i>     | <i>Poraqueiba</i>   | <i>sericea</i>       | 670 |
| 6 | Colombia | ZAR-01 | <i>Fabaceae</i>        | <i>Hymenaea</i>     | <i>reticulata</i>    | 644 |
| 6 | Colombia | ZAR-01 | <i>Fabaceae</i>        | <i>Taralea</i>      | <i>oppositifolia</i> | 733 |
| 6 | Colombia | ZAR-01 | <i>Euphorbiaceae</i>   | <i>Hevea</i>        | <i>nitida</i>        | 559 |
| 6 | Colombia | ZAR-01 | <i>Elaeocarpaceae</i>  | <i>Sloanea</i>      | <i>indet</i>         | 735 |
| 6 | Colombia | ZAR-01 | <i>Myrsinaceae</i>     | <i>indet</i>        | <i>indet</i>         | 693 |
| 6 | Colombia | ZAR-01 | <i>Myrsinaceae</i>     | <i>indet</i>        | <i>indet</i>         | 621 |
| 6 | Colombia | ZAR-01 | <i>Myrtaceae</i>       | <i>Eugenia</i>      | <i>indet</i>         | 561 |
| 6 | Colombia | ZAR-01 | <i>Apocynaceae</i>     | <i>Aspidosperma</i> | <i>indet</i>         | 746 |
| 6 | Colombia | ZAR-01 | <i>Annonaceae</i>      | <i>Xylopia</i>      | <i>emarginata</i>    | 890 |
| 6 | Colombia | ZAR-02 | <i>Fabaceae</i>        | <i>Pterocarpus</i>  | <i>vaupesiana</i>    | 648 |
| 6 | Colombia | ZAR-02 | <i>Myristicaceae</i>   | <i>Iryanthera</i>   | <i>tricornis</i>     | 604 |
| 6 | Colombia | ZAR-02 | <i>Malvaceae</i>       | <i>Scleronema</i>   | <i>praecox</i>       | 550 |
| 6 | Colombia | ZAR-02 | <i>Myristicaceae</i>   | <i>Osteophloeum</i> | <i>platyspermum</i>  | 510 |
| 6 | Colombia | ZAR-02 | <i>Anacardiaceae</i>   | <i>Tapirira</i>     | <i>obtusa</i>        | 694 |
| 6 | Colombia | ZAR-02 | <i>Anacardiaceae</i>   | <i>Tapirira</i>     | <i>obtusa</i>        | 395 |
| 6 | Colombia | ZAR-02 | <i>Urticaceae</i>      | <i>Pourouma</i>     | <i>minor</i>         | 510 |
| 6 | Colombia | ZAR-02 | <i>Malvaceae</i>       | <i>Scleronema</i>   | <i>micranthum</i>    | 571 |
| 6 | Colombia | ZAR-02 | <i>Burseraceae</i>     | <i>Protium</i>      | <i>indet</i>         | 634 |
| 6 | Colombia | ZAR-02 | <i>Burseraceae</i>     | <i>Protium</i>      | <i>indet</i>         | 428 |
| 6 | Colombia | ZAR-02 | <i>Olacaceae</i>       | <i>Miquartia</i>    | <i>indet</i>         | 588 |
| 6 | Colombia | ZAR-02 | <i>Euphorbiaceae</i>   | <i>Mabea</i>        | <i>indet</i>         | 582 |
| 6 | Colombia | ZAR-02 | <i>Salicaceae</i>      | <i>indet</i>        | <i>indet</i>         | 622 |
| 6 | Colombia | ZAR-02 | <i>Malvaceae</i>       | <i>indet</i>        | <i>indet</i>         | 559 |
| 6 | Colombia | ZAR-02 | <i>Clusiaceae</i>      | <i>Caraipa</i>      | <i>indet</i>         | 536 |
| 6 | Colombia | ZAR-02 | <i>Clusiaceae</i>      | <i>Caraipa</i>      | <i>indet</i>         | 512 |
| 6 | Colombia | ZAR-02 | <i>Sapotaceae</i>      | <i>Pouteria</i>     | <i>guianensis</i>    | 683 |
| 6 | Colombia | ZAR-02 | <i>Clusiaceae</i>      | <i>Symphonia</i>    | <i>globulifera</i>   | 611 |
| 6 | Colombia | ZAR-02 | <i>Celastraceae</i>    | <i>Goupia</i>       | <i>glabra</i>        | 706 |
| 6 | Colombia | ZAR-02 | <i>Malvaceae</i>       | <i>Apeiba</i>       | <i>echinata</i>      | 486 |
| 6 | Colombia | ZAR-03 | <i>Violaceae</i>       | <i>Rinorea</i>      | <i>racemosa</i>      | 735 |
| 6 | Colombia | ZAR-03 | <i>Lecythidaceae</i>   | <i>Eschweilera</i>  | <i>puntata</i>       | 558 |
| 6 | Colombia | ZAR-03 | <i>Caryocaraceae</i>   | <i>Anthodiscus</i>  | <i>pilosus</i>       | 598 |
| 6 | Colombia | ZAR-03 | <i>Myristicaceae</i>   | <i>Virola</i>       | <i>pavonis</i>       | 499 |

|   |          |        |                         |                      |                     |     |
|---|----------|--------|-------------------------|----------------------|---------------------|-----|
| 6 | Colombia | ZAR-03 | <i>Euphorbiaceae</i>    | <i>Amanoa</i>        | <i>oblongifolia</i> | 517 |
| 6 | Colombia | ZAR-03 | <i>Meliaceae</i>        | <i>Trichilia</i>     | <i>indet</i>        | 610 |
| 6 | Colombia | ZAR-03 | <i>Fabaceae</i>         | <i>Tachigali</i>     | <i>indet</i>        | 602 |
| 6 | Colombia | ZAR-03 | <i>Lauraceae</i>        | <i>Ocotea</i>        | <i>indet</i>        | 539 |
| 6 | Colombia | ZAR-03 | <i>Fabaceae</i>         | <i>Inga</i>          | <i>indet</i>        | 549 |
| 6 | Colombia | ZAR-03 | <i>Myrtaceae</i>        | <i>indet</i>         | <i>indet</i>        | 644 |
| 6 | Colombia | ZAR-03 | <i>Euphorbiaceae</i>    | <i>indet</i>         | <i>indet</i>        | 611 |
| 6 | Colombia | ZAR-03 | <i>Myrtaceae</i>        | <i>indet</i>         | <i>indet</i>        | 565 |
| 6 | Colombia | ZAR-03 | <i>Annonaceae</i>       | <i>Guatteria</i>     | <i>indet</i>        | 713 |
| 6 | Colombia | ZAR-03 | <i>Fabaceae</i>         | <i>Abarema</i>       | <i>indet</i>        | 617 |
| 6 | Colombia | ZAR-03 | <i>Lecythydaceae</i>    | <i>Eschweilera</i>   | <i>coriacea</i>     | 636 |
| 6 | Colombia | ZAR-03 | <i>Fabaceae</i>         | <i>Cedrelinga</i>    | <i>cateniformis</i> | 762 |
| 6 | Colombia | ZAR-03 | <i>Chrysobalanaceae</i> | <i>Couepia</i>       | <i>bracteosa</i>    | 718 |
| 6 | Colombia | ZAR-03 | <i>Malvaceae</i>        | <i>Matisia</i>       | <i>bracteolosa</i>  | 536 |
| 6 | Colombia | ZAR-04 | <i>Sapotaceae</i>       | <i>Pouteria</i>      | <i>vernica</i>      | 706 |
| 6 | Colombia | ZAR-04 | <i>Moraceae</i>         | <i>Brosimum</i>      | <i>rubescens</i>    | 462 |
| 6 | Colombia | ZAR-04 | <i>Lecythydaceae</i>    | <i>Eschweilera</i>   | <i>puntata</i>      | 626 |
| 6 | Colombia | ZAR-04 | <i>Lecythydaceae</i>    | <i>Eschweilera</i>   | <i>puntata</i>      | 572 |
| 6 | Colombia | ZAR-04 | <i>Combretaceae</i>     | <i>Buchenavia</i>    | <i>parvifolia</i>   | 637 |
| 6 | Colombia | ZAR-04 | <i>Chrysobalanaceae</i> | <i>Licania</i>       | <i>lata</i>         | 745 |
| 6 | Colombia | ZAR-04 | <i>Lauraceae</i>        | <i>Nectandra</i>     | <i>indet</i>        | 706 |
| 6 | Colombia | ZAR-04 | <i>Chrysobalanaceae</i> | <i>indet</i>         | <i>indet</i>        | 682 |
| 6 | Colombia | ZAR-04 | <i>Sapotaceae</i>       | <i>indet</i>         | <i>indet</i>        | 606 |
| 6 | Colombia | ZAR-04 | <i>indet</i>            | <i>indet</i>         | <i>indet</i>        | 605 |
| 6 | Colombia | ZAR-04 | <i>Sapotaceae</i>       | <i>indet</i>         | <i>indet</i>        | 575 |
| 6 | Colombia | ZAR-04 | <i>Lauraceae</i>        | <i>indet</i>         | <i>indet</i>        | 568 |
| 6 | Colombia | ZAR-04 | <i>Myrtaceae</i>        | <i>Eugenia</i>       | <i>indet</i>        | 720 |
| 6 | Colombia | ZAR-04 | <i>Lecythydaceae</i>    | <i>Eschweilera</i>   | <i>indet</i>        | 652 |
| 6 | Colombia | ZAR-04 | <i>Chrysobalanaceae</i> | <i>Couepia</i>       | <i>indet</i>        | 480 |
| 6 | Colombia | ZAR-04 | <i>Euphorbiaceae</i>    | <i>Hevea</i>         | <i>guianensis</i>   | 555 |
| 6 | Colombia | ZAR-04 | <i>Euphorbiaceae</i>    | <i>Hevea</i>         | <i>guianensis</i>   | 525 |
| 6 | Colombia | ZAR-04 | <i>Meliaceae</i>        | <i>Carapa</i>        | <i>guianensis</i>   | 732 |
| 6 | Colombia | ZAR-04 | <i>Meliaceae</i>        | <i>Carapa</i>        | <i>guianensis</i>   | 573 |
| 6 | Colombia | ZAR-04 | <i>Lecythydaceae</i>    | <i>Eschweilera</i>   | <i>bracteosa</i>    | 591 |
| 5 | Ecuador  | BOG-01 | <i>Lauraceae</i>        | <i>Chlorocardium</i> | <i>venenosum</i>    | 534 |
| 5 | Ecuador  | BOG-01 | <i>Moraceae</i>         | <i>Perebea</i>       | <i>tessmannii</i>   | 764 |
| 5 | Ecuador  | BOG-01 | <i>Moraceae</i>         | <i>Perebea</i>       | <i>tessmannii</i>   | 324 |
| 5 | Ecuador  | BOG-01 | <i>Simaroubaceae</i>    | <i>Picramnia</i>     | <i>sellowii</i>     | 583 |
| 5 | Ecuador  | BOG-01 | <i>Ulmaceae</i>         | <i>Celtis</i>        | <i>schippii</i>     | 682 |
| 5 | Ecuador  | BOG-01 | <i>Myristicaceae</i>    | <i>Otoba</i>         | <i>parvifolia</i>   | 451 |
| 5 | Ecuador  | BOG-01 | <i>Meliaceae</i>        | <i>Trichilia</i>     | <i>pallida</i>      | 460 |
| 5 | Ecuador  | BOG-01 | <i>Urticaceae</i>       | <i>Coussapoa</i>     | <i>orthoneura</i>   | 551 |
| 5 | Ecuador  | BOG-01 | <i>Euphorbiaceae</i>    | <i>Caryodendron</i>  | <i>orinocense</i>   | 611 |
| 5 | Ecuador  | BOG-01 | <i>Euphorbiaceae</i>    | <i>Caryodendron</i>  | <i>orinocense</i>   | 592 |
| 5 | Ecuador  | BOG-01 | <i>Euphorbiaceae</i>    | <i>Caryodendron</i>  | <i>orinocense</i>   | 533 |
| 5 | Ecuador  | BOG-01 | <i>Euphorbiaceae</i>    | <i>Caryodendron</i>  | <i>orinocense</i>   | 523 |
| 5 | Ecuador  | BOG-01 | <i>Combretaceae</i>     | <i>Terminalia</i>    | <i>oblonga</i>      | 436 |
| 5 | Ecuador  | BOG-01 | <i>Euphorbiaceae</i>    | <i>Margaritaria</i>  | <i>nobilis</i>      | 521 |
| 5 | Ecuador  | BOG-01 | <i>Fabaceae</i>         | <i>Inga</i>          | <i>multinervis</i>  | 531 |
| 5 | Ecuador  | BOG-01 | <i>Fabaceae</i>         | <i>Inga</i>          | <i>multinervis</i>  | 492 |
| 5 | Ecuador  | BOG-01 | <i>Euphorbiaceae</i>    | <i>Drypetes</i>      | <i>medium</i>       | 539 |
| 5 | Ecuador  | BOG-01 | <i>Meliaceae</i>        | <i>Guarea</i>        | <i>macrophylla</i>  | 592 |
| 5 | Ecuador  | BOG-01 | <i>Fabaceae</i>         | <i>Inga</i>          | <i>leiocalycina</i> | 531 |
| 5 | Ecuador  | BOG-01 | <i>Annonaceae</i>       | <i>Xylopia</i>       | <i>indet</i>        | 540 |



|   |         |        |                        |                        |                      |     |
|---|---------|--------|------------------------|------------------------|----------------------|-----|
| 5 | Ecuador | BOG-01 | <i>Sapindaceae</i>     | <i>Talisia</i>         | <i>indet</i>         | 558 |
| 5 | Ecuador | BOG-01 | <i>Fabaceae</i>        | <i>Swartzia</i>        | <i>indet</i>         | 566 |
| 5 | Ecuador | BOG-01 | <i>Elaeocarpaceae</i>  | <i>Sloanea</i>         | <i>indet</i>         | 602 |
| 5 | Ecuador | BOG-01 | <i>Euphorbiaceae</i>   | <i>Phyllanthus</i>     | <i>indet</i>         | 554 |
| 5 | Ecuador | BOG-01 | <i>Fabaceae</i>        | <i>Inga</i>            | <i>indet</i>         | 582 |
| 5 | Ecuador | BOG-01 | <i>Myrtaceae</i>       | <i>indet</i>           | <i>indet</i>         | 796 |
| 5 | Ecuador | BOG-01 | <i>Fabaceae</i>        | <i>indet</i>           | <i>indet</i>         | 692 |
| 5 | Ecuador | BOG-01 | <i>indet</i>           | <i>indet</i>           | <i>indet</i>         | 665 |
| 5 | Ecuador | BOG-01 | <i>indet</i>           | <i>indet</i>           | <i>indet</i>         | 546 |
| 5 | Ecuador | BOG-01 | <i>Meliaceae</i>       | <i>Guarea</i>          | <i>indet</i>         | 721 |
| 5 | Ecuador | BOG-01 | <i>Lecythidaceae</i>   | <i>Eschweilera</i>     | <i>indet</i>         | 634 |
| 5 | Ecuador | BOG-01 | <i>Araliaceae</i>      | <i>Dendropanax</i>     | <i>indet</i>         | 498 |
| 5 | Ecuador | BOG-01 | <i>Euphorbiaceae</i>   | <i>Senefeldera</i>     | <i>inclinata</i>     | 620 |
| 5 | Ecuador | BOG-01 | <i>Fabaceae</i>        | <i>Dialium</i>         | <i>guianense</i>     | 484 |
| 5 | Ecuador | BOG-01 | <i>Fabaceae</i>        | <i>Brownea</i>         | <i>grandiceps</i>    | 716 |
| 5 | Ecuador | BOG-01 | <i>Violaceae</i>       | <i>Leonia</i>          | <i>glycyarpa</i>     | 495 |
| 5 | Ecuador | BOG-01 | <i>Annonaceae</i>      | <i>Unonopsis</i>       | <i>floribunda</i>    | 398 |
| 5 | Ecuador | BOG-01 | <i>Burseraceae</i>     | <i>Protium</i>         | <i>fimbriatum</i>    | 356 |
| 5 | Ecuador | BOG-01 | <i>Lauraceae</i>       | <i>Nectandra</i>       | <i>crassiloba</i>    | 526 |
| 5 | Ecuador | BOG-01 | <i>Fabaceae</i>        | <i>Inga</i>            | <i>coruscans</i>     | 525 |
| 5 | Ecuador | BOG-01 | <i>Moraceae</i>        | <i>Poulsenia</i>       | <i>armata</i>        | 451 |
| 5 | Ecuador | BOG-01 | <i>Violaceae</i>       | <i>Rinorea</i>         | <i>apiculata</i>     | 515 |
| 5 | Ecuador | BOG-01 | <i>Fabaceae</i>        | <i>Macrolobium</i>     | <i>angustifolium</i> | 558 |
| 5 | Ecuador | BOG-01 | <i>Rutaceae</i>        | <i>Zanthoxylum</i>     | <i>acuminata</i>     | 533 |
| 5 | Ecuador | BOG-02 | <i>Sapotaceae</i>      | <i>Pouteria</i>        | <i>trilocularis</i>  | 565 |
| 5 | Ecuador | BOG-02 | <i>Euphorbiaceae</i>   | <i>Croton</i>          | <i>tessmannii</i>    | 433 |
| 5 | Ecuador | BOG-02 | <i>Malvaceae</i>       | <i>Theobroma</i>       | <i>subincanum</i>    | 515 |
| 5 | Ecuador | BOG-02 | <i>Moraceae</i>        | <i>Pseudolmedia</i>    | <i>rigida</i>        | 605 |
| 5 | Ecuador | BOG-02 | <i>Salicaceae</i>      | <i>Laetia</i>          | <i>procera</i>       | 577 |
| 5 | Ecuador | BOG-02 | <i>Meliaceae</i>       | <i>Trichilia</i>       | <i>pleeana</i>       | 584 |
| 5 | Ecuador | BOG-02 | <i>Salicaceae</i>      | <i>Lunania</i>         | <i>parviflora</i>    | 493 |
| 5 | Ecuador | BOG-02 | <i>Malvaceae</i>       | <i>Quararibea</i>      | <i>obliquifolia</i>  | 336 |
| 5 | Ecuador | BOG-02 | <i>Malvaceae</i>       | <i>Quararibea</i>      | <i>obliquifolia</i>  | 328 |
| 5 | Ecuador | BOG-02 | <i>Lecythidaceae</i>   | <i>Grias</i>           | <i>neuberthii</i>    | 404 |
| 5 | Ecuador | BOG-02 | <i>Clusiaceae</i>      | <i>Chrysochlamys</i>   | <i>membranacea</i>   | 417 |
| 5 | Ecuador | BOG-02 | <i>Moraceae</i>        | <i>Pseudolmedia</i>    | <i>laevis</i>        | 607 |
| 5 | Ecuador | BOG-02 | <i>Moraceae</i>        | <i>Pseudolmedia</i>    | <i>laevis</i>        | 544 |
| 5 | Ecuador | BOG-02 | <i>Myristicaceae</i>   | <i>Iryanthera</i>      | <i>juruensis</i>     | 587 |
| 5 | Ecuador | BOG-02 | <i>Dichapetalaceae</i> | <i>Tapura</i>          | <i>juruana</i>       | 575 |
| 5 | Ecuador | BOG-02 | <i>Meliaceae</i>       | <i>Trichilia</i>       | <i>indet</i>         | 540 |
| 5 | Ecuador | BOG-02 | <i>Burseraceae</i>     | <i>Protium</i>         | <i>indet</i>         | 653 |
| 5 | Ecuador | BOG-02 | <i>indet</i>           | <i>indet</i>           | <i>indet</i>         | 766 |
| 5 | Ecuador | BOG-02 | <i>Myrtaceae</i>       | <i>indet</i>           | <i>indet</i>         | 663 |
| 5 | Ecuador | BOG-02 | <i>Lauraceae</i>       | <i>indet</i>           | <i>indet</i>         | 492 |
| 5 | Ecuador | BOG-02 | <i>Annonaceae</i>      | <i>indet</i>           | <i>indet</i>         | 428 |
| 5 | Ecuador | BOG-02 | <i>Euphorbiaceae</i>   | <i>Drypetes</i>        | <i>indet</i>         | 527 |
| 5 | Ecuador | BOG-02 | <i>Lauraceae</i>       | <i>Cryptocarya</i>     | <i>indet</i>         | 514 |
| 5 | Ecuador | BOG-02 | <i>Meliaceae</i>       | <i>Guarea</i>          | <i>grandifolia</i>   | 599 |
| 5 | Ecuador | BOG-02 | <i>Staphyleaceae</i>   | <i>Huertia</i>         | <i>glandulosa</i>    | 566 |
| 5 | Ecuador | BOG-02 | <i>Lauraceae</i>       | <i>Caryodaphnopsis</i> | <i>fosteri</i>       | 559 |
| 5 | Ecuador | BOG-02 | <i>Annonaceae</i>      | <i>Unonopsis</i>       | <i>floribunda</i>    | 412 |
| 5 | Ecuador | BOG-02 | <i>Polygonaceae</i>    | <i>Coccoloba</i>       | <i>densifrons</i>    | 689 |
| 5 | Ecuador | BOG-02 | <i>Lecythidaceae</i>   | <i>Eschweilera</i>     | <i>coriacea</i>      | 651 |
| 5 | Ecuador | BOG-02 | <i>Malvaceae</i>       | <i>Quararibea</i>      | <i>cordata</i>       | 469 |

|   |         |        |                        |                     |                     |     |
|---|---------|--------|------------------------|---------------------|---------------------|-----|
| 5 | Ecuador | BOG-02 | <i>Fabaceae</i>        | <i>Bauhinia</i>     | <i>brachycalyx</i>  | 481 |
| 5 | Ecuador | BOG-02 | <i>Malvaceae</i>       | <i>Pachira</i>      | <i>aquatica</i>     | 619 |
| 5 | Ecuador | BOG-02 | <i>Violaceae</i>       | <i>Rinorea</i>      | <i>apiculata</i>    | 500 |
| 5 | Ecuador | JAS-02 | <i>Urticaceae</i>      | <i>Pourouma</i>     | <i>tomentosa</i>    | 622 |
| 5 | Ecuador | JAS-02 | <i>Salicaceae</i>      | <i>Laetia</i>       | <i>procera</i>      | 540 |
| 5 | Ecuador | JAS-02 | <i>Myristicaceae</i>   | <i>Osteophloeum</i> | <i>platyspermum</i> | 446 |
| 5 | Ecuador | JAS-02 | <i>Moraceae</i>        | <i>Pseudolmedia</i> | <i>laevis</i>       | 574 |
| 5 | Ecuador | JAS-02 | <i>Aquifoliaceae</i>   | <i>Ilex</i>         | <i>inundata</i>     | 499 |
| 5 | Ecuador | JAS-02 | <i>Melastomataceae</i> | <i>Miconia</i>      | <i>indet</i>        | 509 |
| 5 | Ecuador | JAS-02 | <i>Fabaceae</i>        | <i>Inga</i>         | <i>indet</i>        | 499 |
| 5 | Ecuador | JAS-02 | <i>indet</i>           | <i>indet</i>        | <i>indet</i>        | 528 |
| 5 | Ecuador | JAS-02 | <i>Salicaceae</i>      | <i>Hasseltia</i>    | <i>indet</i>        | 557 |
| 5 | Ecuador | JAS-02 | <i>Annonaceae</i>      | <i>Guatteria</i>    | <i>indet</i>        | 454 |
| 5 | Ecuador | JAS-02 | <i>Oleaceae</i>        | <i>Chionanthus</i>  | <i>implicatus</i>   | 575 |
| 5 | Ecuador | JAS-02 | <i>Urticaceae</i>      | <i>Pourouma</i>     | <i>guianensis</i>   | 482 |
| 5 | Ecuador | JAS-02 | <i>Burseraceae</i>     | <i>Protium</i>      | <i>fimbriatum</i>   | 710 |
| 5 | Ecuador | JAS-02 | <i>Fabaceae</i>        | <i>Inga</i>         | <i>fagifolia</i>    | 634 |
| 5 | Ecuador | JAS-02 | <i>Lauraceae</i>       | <i>Nectandra</i>    | <i>crassiloba</i>   | 486 |
| 5 | Ecuador | JAS-02 | <i>Fabaceae</i>        | <i>Inga</i>         | <i>coriacea</i>     | 708 |
| 5 | Ecuador | JAS-02 | <i>Bignoniaceae</i>    | <i>Jacaranda</i>    | <i>copaia</i>       | 458 |
| 5 | Ecuador | JAS-02 | <i>Malvaceae</i>       | <i>Sterculia</i>    | <i>colombiana</i>   | 561 |
| 5 | Ecuador | JAS-02 | <i>Araliaceae</i>      | <i>Dendropanax</i>  | <i>caucanus</i>     | 481 |
| 5 | Ecuador | JAS-02 | <i>Myristicaceae</i>   | <i>Virola</i>       | <i>calophylla</i>   | 437 |
| 5 | Ecuador | JAS-02 | <i>Malvaceae</i>       | <i>Apeiba</i>       | <i>aspera</i>       | 380 |
| 5 | Ecuador | JAS-03 | <i>Sapotaceae</i>      | <i>Micropholis</i>  | <i>venulosa</i>     | 494 |
| 5 | Ecuador | JAS-03 | <i>Fabaceae</i>        | <i>Tachigali</i>    | <i>vasquezii</i>    | 478 |
| 5 | Ecuador | JAS-03 | <i>Vochysiaceae</i>    | <i>Erisma</i>       | <i>uncinatum</i>    | 553 |
| 5 | Ecuador | JAS-03 | <i>Rubiaceae</i>       | <i>Pentagonia</i>   | <i>spathicalyx</i>  | 509 |
| 5 | Ecuador | JAS-03 | <i>Moraceae</i>        | <i>Pseudolmedia</i> | <i>rigida</i>       | 587 |
| 5 | Ecuador | JAS-03 | <i>Fabaceae</i>        | <i>Parkia</i>       | <i>multijuga</i>    | 567 |
| 5 | Ecuador | JAS-03 | <i>Annonaceae</i>      | <i>Porcelia</i>     | <i>mediocris</i>    | 404 |
| 5 | Ecuador | JAS-03 | <i>Vochysiaceae</i>    | <i>Vochysia</i>     | <i>leguiana</i>     | 512 |
| 5 | Ecuador | JAS-03 | <i>Rubiaceae</i>       | <i>Alseis</i>       | <i>labatioides</i>  | 468 |
| 5 | Ecuador | JAS-03 | <i>Myristicaceae</i>   | <i>Otoba</i>        | <i>glycycarpa</i>   | 448 |
| 5 | Ecuador | JAS-03 | <i>Lecythydaceae</i>   | <i>Eschweilera</i>  | <i>gigantea</i>     | 654 |
| 5 | Ecuador | JAS-03 | <i>Annonaceae</i>      | <i>Unonopsis</i>    | <i>floribunda</i>   | 517 |
| 5 | Ecuador | JAS-03 | <i>Annonaceae</i>      | <i>Rollinia</i>     | <i>exsucca</i>      | 401 |
| 5 | Ecuador | JAS-03 | <i>Rhamnaceae</i>      | <i>Rhamnidium</i>   | <i>elaeocarpum</i>  | 518 |
| 5 | Ecuador | JAS-03 | <i>Polygonaceae</i>    | <i>Coccoloba</i>    | <i>densifrons</i>   | 654 |
| 5 | Ecuador | JAS-03 | <i>Fabaceae</i>        | <i>Inga</i>         | <i>capitata</i>     | 496 |
| 5 | Ecuador | JAS-03 | <i>Fabaceae</i>        | <i>Bauhinia</i>     | <i>arborea</i>      | 611 |
| 5 | Ecuador | JAS-03 | <i>Fabaceae</i>        | <i>Inga</i>         | <i>alba</i>         | 589 |
| 5 | Ecuador | JAS-03 | <i>Fabaceae</i>        | <i>Inga</i>         | <i>acreana</i>      | 527 |
| 5 | Ecuador | JAS-04 | <i>Araliaceae</i>      | <i>Schefflera</i>   | <i>morototoni</i>   | 502 |
| 5 | Ecuador | JAS-04 | <i>Urticaceae</i>      | <i>Pourouma</i>     | <i>minor</i>        | 516 |
| 5 | Ecuador | JAS-04 | <i>Vochysiaceae</i>    | <i>Vochysia</i>     | <i>leguiana</i>     | 591 |
| 5 | Ecuador | JAS-04 | <i>Bignoniaceae</i>    | <i>Tabebuia</i>     | <i>indet</i>        | 561 |
| 5 | Ecuador | JAS-04 | <i>Moraceae</i>        | <i>Pseudolmedia</i> | <i>indet</i>        | 618 |
| 5 | Ecuador | JAS-04 | <i>Sapotaceae</i>      | <i>Pouteria</i>     | <i>indet</i>        | 594 |
| 5 | Ecuador | JAS-04 | <i>Sapotaceae</i>      | <i>Pouteria</i>     | <i>indet</i>        | 584 |
| 5 | Ecuador | JAS-04 | <i>Urticaceae</i>      | <i>Pourouma</i>     | <i>indet</i>        | 512 |
| 5 | Ecuador | JAS-04 | <i>Rubiaceae</i>       | <i>Pentagonia</i>   | <i>indet</i>        | 775 |
| 5 | Ecuador | JAS-04 | <i>Melastomataceae</i> | <i>Miconia</i>      | <i>indet</i>        | 629 |
| 5 | Ecuador | JAS-04 | <i>indet</i>           | <i>indet</i>        | <i>indet</i>        | 640 |

|   |         |        |                      |                      |                      |     |
|---|---------|--------|----------------------|----------------------|----------------------|-----|
| 5 | Ecuador | JAS-04 | <i>indet</i>         | <i>indet</i>         | <i>indet</i>         | 582 |
| 5 | Ecuador | JAS-04 | <i>Lauraceae</i>     | <i>indet</i>         | <i>indet</i>         | 534 |
| 5 | Ecuador | JAS-04 | <i>Myristicaceae</i> | <i>indet</i>         | <i>indet</i>         | 531 |
| 5 | Ecuador | JAS-04 | <i>indet</i>         | <i>indet</i>         | <i>indet</i>         | 529 |
| 5 | Ecuador | JAS-04 | <i>Moraceae</i>      | <i>indet</i>         | <i>indet</i>         | 471 |
| 5 | Ecuador | JAS-04 | <i>Annonaceae</i>    | <i>Guatteria</i>     | <i>indet</i>         | 414 |
| 5 | Ecuador | JAS-04 | <i>Myristicaceae</i> | <i>Otoba</i>         | <i>glycyarpa</i>     | 516 |
| 5 | Ecuador | JAS-04 | <i>Myristicaceae</i> | <i>Otoba</i>         | <i>glycyarpa</i>     | 496 |
| 5 | Ecuador | JAS-04 | <i>Rosaceae</i>      | <i>Prunus</i>        | <i>debilis</i>       | 667 |
| 5 | Ecuador | JAS-04 | <i>Myristicaceae</i> | <i>Virola</i>        | <i>calophylla</i>    | 623 |
| 5 | Ecuador | JAS-04 | <i>Myristicaceae</i> | <i>Virola</i>        | <i>calophylla</i>    | 410 |
| 5 | Ecuador | JAS-05 | <i>Euphorbiaceae</i> | <i>Tetrorchidium</i> | <i>rubrivenium</i>   | 339 |
| 5 | Ecuador | JAS-05 | <i>Bixaceae</i>      | <i>Bixa</i>          | <i>platycarpa</i>    | 371 |
| 5 | Ecuador | JAS-05 | <i>Bixaceae</i>      | <i>Bixa</i>          | <i>platycarpa</i>    | 362 |
| 5 | Ecuador | JAS-05 | <i>Annonaceae</i>    | <i>Rollinia</i>      | <i>pittieri</i>      | 373 |
| 5 | Ecuador | JAS-05 | <i>Moraceae</i>      | <i>Ficus</i>         | <i>piresiana</i>     | 436 |
| 5 | Ecuador | JAS-05 | <i>Myristicaceae</i> | <i>Otoba</i>         | <i>parvifolia</i>    | 473 |
| 5 | Ecuador | JAS-05 | <i>Myristicaceae</i> | <i>Otoba</i>         | <i>parvifolia</i>    | 457 |
| 5 | Ecuador | JAS-05 | <i>Myristicaceae</i> | <i>Otoba</i>         | <i>parvifolia</i>    | 414 |
| 5 | Ecuador | JAS-05 | <i>Fabaceae</i>      | <i>Albizia</i>       | <i>niopoides</i>     | 465 |
| 5 | Ecuador | JAS-05 | <i>Fabaceae</i>      | <i>Inga</i>          | <i>multinervis</i>   | 480 |
| 5 | Ecuador | JAS-05 | <i>Urticaceae</i>    | <i>Pourouma</i>      | <i>minor</i>         | 534 |
| 5 | Ecuador | JAS-05 | <i>Sapindaceae</i>   | <i>Cupania</i>       | <i>livida</i>        | 584 |
| 5 | Ecuador | JAS-05 | <i>Rubiaceae</i>     | <i>Posoqueria</i>    | <i>latifolia</i>     | 495 |
| 5 | Ecuador | JAS-05 | <i>Meliaceae</i>     | <i>Guarea</i>        | <i>kunthiana</i>     | 505 |
| 5 | Ecuador | JAS-05 | <i>Meliaceae</i>     | <i>Guarea</i>        | <i>kunthiana</i>     | 469 |
| 5 | Ecuador | JAS-05 | <i>Meliaceae</i>     | <i>Guarea</i>        | <i>kunthiana</i>     | 453 |
| 5 | Ecuador | JAS-05 | <i>Olacaceae</i>     | <i>Heisteria</i>     | <i>indet</i>         | 588 |
| 5 | Ecuador | JAS-05 | <i>Rubiaceae</i>     | <i>Chimarrhis</i>    | <i>hookeri</i>       | 546 |
| 5 | Ecuador | JAS-05 | <i>Myristicaceae</i> | <i>Virola</i>        | <i>elongata</i>      | 538 |
| 5 | Ecuador | JAS-05 | <i>Olacaceae</i>     | <i>Heisteria</i>     | <i>concinna</i>      | 549 |
| 5 | Ecuador | SUM-01 | <i>Icacinaceae</i>   | <i>Metteniusa</i>    | <i>tessmanniana</i>  | 482 |
| 5 | Ecuador | SUM-01 | <i>Sabiaceae</i>     | <i>Meliosma</i>      | <i>sumacensis</i>    | 343 |
| 5 | Ecuador | SUM-01 | <i>Lauraceae</i>     | <i>Endlicheria</i>   | <i>sericea</i>       | 495 |
| 5 | Ecuador | SUM-01 | <i>Burseraceae</i>   | <i>Dacryodes</i>     | <i>olivifera</i>     | 602 |
| 5 | Ecuador | SUM-01 | <i>Meliaceae</i>     | <i>Cedrela</i>       | <i>odorata</i>       | 527 |
| 5 | Ecuador | SUM-01 | <i>Proteaceae</i>    | <i>Euplassa</i>      | <i>occidentalis</i>  | 591 |
| 5 | Ecuador | SUM-01 | <i>Lauraceae</i>     | <i>Ocotea</i>        | <i>javitensis</i>    | 494 |
| 5 | Ecuador | SUM-01 | <i>Fabaceae</i>      | <i>Tachigali</i>     | <i>indet</i>         | 507 |
| 5 | Ecuador | SUM-01 | <i>Rosaceae</i>      | <i>Prunus</i>        | <i>indet</i>         | 538 |
| 5 | Ecuador | SUM-01 | <i>Rosaceae</i>      | <i>Prunus</i>        | <i>indet</i>         | 533 |
| 5 | Ecuador | SUM-01 | <i>Fabaceae</i>      | <i>Inga</i>          | <i>indet</i>         | 585 |
| 5 | Ecuador | SUM-01 | <i>Fabaceae</i>      | <i>Inga</i>          | <i>indet</i>         | 566 |
| 5 | Ecuador | SUM-01 | <i>Lauraceae</i>     | <i>indet</i>         | <i>indet</i>         | 445 |
| 5 | Ecuador | SUM-01 | <i>Anacardiaceae</i> | <i>Tapirira</i>      | <i>guianensis</i>    | 604 |
| 5 | Ecuador | SUM-01 | <i>Euphorbiaceae</i> | <i>Alchornea</i>     | <i>glandulosa</i>    | 421 |
| 5 | Ecuador | SUM-01 | <i>Euphorbiaceae</i> | <i>Hyeronima</i>     | <i>duquei</i>        | 445 |
| 5 | Ecuador | SUM-01 | <i>Burseraceae</i>   | <i>Dacryodes</i>     | <i>cupularis</i>     | 512 |
| 5 | Ecuador | SUM-01 | <i>Boraginaceae</i>  | <i>Cerdana</i>       | <i>alliodora</i>     | 495 |
| 5 | Ecuador | TIP-03 | <i>Moraceae</i>      | <i>Sorocea</i>       | <i>steinbachii</i>   | 574 |
| 5 | Ecuador | TIP-03 | <i>Annonaceae</i>    | <i>Duguetia</i>      | <i>spixiana</i>      | 544 |
| 5 | Ecuador | TIP-03 | <i>Annonaceae</i>    | <i>Duguetia</i>      | <i>spixiana</i>      | 539 |
| 5 | Ecuador | TIP-03 | <i>Annonaceae</i>    | <i>Xylopia</i>       | <i>ligustrifolia</i> | 516 |
| 5 | Ecuador | TIP-03 | <i>Moraceae</i>      | <i>Brosimum</i>      | <i>lactescens</i>    | 597 |

|   |         |        |                      |                     |                       |     |
|---|---------|--------|----------------------|---------------------|-----------------------|-----|
| 5 | Ecuador | TIP-03 | <i>Rutaceae</i>      | <i>Zanthoxylum</i>  | <i>indet</i>          | 588 |
| 5 | Ecuador | TIP-03 | <i>Sapotaceae</i>    | <i>Pouteria</i>     | <i>indet</i>          | 656 |
| 5 | Ecuador | TIP-03 | <i>Sapotaceae</i>    | <i>Pouteria</i>     | <i>indet</i>          | 495 |
| 5 | Ecuador | TIP-03 | <i>Malvaceae</i>     | <i>Luehea</i>       | <i>indet</i>          | 403 |
| 5 | Ecuador | TIP-03 | <i>Fabaceae</i>      | <i>Inga</i>         | <i>indet</i>          | 571 |
| 5 | Ecuador | TIP-03 | <i>Fabaceae</i>      | <i>Inga</i>         | <i>indet</i>          | 554 |
| 5 | Ecuador | TIP-03 | <i>Fabaceae</i>      | <i>Inga</i>         | <i>indet</i>          | 510 |
| 5 | Ecuador | TIP-03 | <i>Fabaceae</i>      | <i>Inga</i>         | <i>indet</i>          | 506 |
| 5 | Ecuador | TIP-03 | <i>Polygonaceae</i>  | <i>indet</i>        | <i>indet</i>          | 592 |
| 5 | Ecuador | TIP-03 | <i>indet</i>         | <i>indet</i>        | <i>indet</i>          | 548 |
| 5 | Ecuador | TIP-03 | <i>indet</i>         | <i>indet</i>        | <i>indet</i>          | 546 |
| 5 | Ecuador | TIP-03 | <i>Malpighiaceae</i> | <i>Byrsonima</i>    | <i>indet</i>          | 509 |
| 5 | Ecuador | TIP-03 | <i>Meliaceae</i>     | <i>Guarea</i>       | <i>guidonia</i>       | 609 |
| 5 | Ecuador | TIP-03 | <i>Meliaceae</i>     | <i>Guarea</i>       | <i>guidonia</i>       | 541 |
| 5 | Ecuador | TIP-03 | <i>Lecythidaceae</i> | <i>Couratari</i>    | <i>guianensis</i>     | 598 |
| 5 | Ecuador | TIP-05 | <i>Moraceae</i>      | <i>Sorocea</i>      | <i>steinbachii</i>    | 539 |
| 5 | Ecuador | TIP-05 | <i>Meliaceae</i>     | <i>Guarea</i>       | <i>kunthiana</i>      | 511 |
| 5 | Ecuador | TIP-05 | <i>indet</i>         | <i>indet</i>        | <i>indet</i>          | 862 |
| 5 | Ecuador | TIP-05 | <i>Nyctaginaceae</i> | <i>indet</i>        | <i>indet</i>          | 466 |
| 5 | Ecuador | TIP-05 | <i>Meliaceae</i>     | <i>Guarea</i>       | <i>gomma</i>          | 576 |
| 5 | Ecuador | TIP-05 | <i>Myristicaceae</i> | <i>Virola</i>       | <i>duckei</i>         | 626 |
| 5 | Ecuador | TIP-05 | <i>Fabaceae</i>      | <i>Inga</i>         | <i>coruscans</i>      | 440 |
| 5 | Ecuador | TIP-05 | <i>Rubiaceae</i>     | <i>Simira</i>       | <i>cordifolia</i>     | 623 |
| 5 | Ecuador | TIP-05 | <i>Malvaceae</i>     | <i>Sterculia</i>    | <i>colombiana</i>     | 573 |
| 5 | Ecuador | TIP-05 | <i>Fabaceae</i>      | <i>Bauhinia</i>     | <i>arborea</i>        | 477 |
| 5 | Ecuador | TIP-05 | <i>Fabaceae</i>      | <i>Macrolobium</i>  | <i>angustifolium</i>  | 558 |
| 4 | N-Peru  | ALP-11 | <i>Euphorbiaceae</i> | <i>Micrandra</i>    | <i>spruceana</i>      | 566 |
| 4 | N-Peru  | ALP-11 | <i>Fabaceae</i>      | <i>Swartzia</i>     | <i>racemosa</i>       | 733 |
| 4 | N-Peru  | ALP-11 | <i>Myristicaceae</i> | <i>Iryanthera</i>   | <i>polyneura</i>      | 588 |
| 4 | N-Peru  | ALP-11 | <i>Myristicaceae</i> | <i>Virola</i>       | <i>pavonis</i>        | 572 |
| 4 | N-Peru  | ALP-11 | <i>Fabaceae</i>      | <i>Taralea</i>      | <i>oppositifolia</i>  | 659 |
| 4 | N-Peru  | ALP-11 | <i>Araliaceae</i>    | <i>Schefflera</i>   | <i>morototoni</i>     | 685 |
| 4 | N-Peru  | ALP-11 | <i>Fabaceae</i>      | <i>Tachigali</i>    | <i>indet</i>          | 902 |
| 4 | N-Peru  | ALP-11 | <i>Fabaceae</i>      | <i>Tachigali</i>    | <i>indet</i>          | 817 |
| 4 | N-Peru  | ALP-11 | <i>Sapindaceae</i>   | <i>Matayba</i>      | <i>indet</i>          | 593 |
| 4 | N-Peru  | ALP-11 | <i>Sapotaceae</i>    | <i>Micropholis</i>  | <i>egensis</i>        | 604 |
| 4 | N-Peru  | ALP-12 | <i>Myristicaceae</i> | <i>Iryanthera</i>   | <i>ulei</i>           | 694 |
| 4 | N-Peru  | ALP-12 | <i>Euphorbiaceae</i> | <i>Micrandra</i>    | <i>spruceana</i>      | 617 |
| 4 | N-Peru  | ALP-12 | <i>Lecythidaceae</i> | <i>Eschweilera</i>  | <i>rufifolia</i>      | 739 |
| 4 | N-Peru  | ALP-12 | <i>Lecythidaceae</i> | <i>Lecythis</i>     | <i>ponis</i>          | 663 |
| 4 | N-Peru  | ALP-12 | <i>Apocynaceae</i>   | <i>Ambelania</i>    | <i>occidentalis</i>   | 561 |
| 4 | N-Peru  | ALP-12 | <i>indet</i>         | <i>indet</i>        | <i>indet</i>          | 538 |
| 4 | N-Peru  | ALP-12 | <i>Sapotaceae</i>    | <i>Micropholis</i>  | <i>guyanensis</i>     | 679 |
| 4 | N-Peru  | ALP-12 | <i>Sapotaceae</i>    | <i>Micropholis</i>  | <i>casiquiarensis</i> | 631 |
| 4 | N-Peru  | ALP-12 | <i>Sapotaceae</i>    | <i>Pouteria</i>     | <i>bangii</i>         | 670 |
| 4 | N-Peru  | ALP-21 | <i>Fabaceae</i>      | <i>Tachigali</i>    | <i>tessmannii</i>     | 795 |
| 4 | N-Peru  | ALP-21 | <i>Fabaceae</i>      | <i>Lonchocarpus</i> | <i>spiciflorus</i>    | 747 |
| 4 | N-Peru  | ALP-21 | <i>Fabaceae</i>      | <i>Tachigali</i>    | <i>ptychophysca</i>   | 832 |
| 4 | N-Peru  | ALP-21 | <i>Myristicaceae</i> | <i>Virola</i>       | <i>pavonis</i>        | 528 |
| 4 | N-Peru  | ALP-21 | <i>Euphorbiaceae</i> | <i>Micrandra</i>    | <i>elata</i>          | 578 |
| 4 | N-Peru  | ALP-21 | <i>Sapotaceae</i>    | <i>Pouteria</i>     | <i>cuspidata</i>      | 841 |
| 4 | N-Peru  | ALP-22 | <i>Moraceae</i>      | <i>Brosimum</i>     | <i>utile</i>          | 595 |
| 4 | N-Peru  | ALP-22 | <i>Fabaceae</i>      | <i>Inga</i>         | <i>spectabilis</i>    | 639 |
| 4 | N-Peru  | ALP-22 | <i>Malvaceae</i>     | <i>Theobroma</i>    | <i>obovatum</i>       | 604 |

|   |        |        |                         |                         |                        |     |
|---|--------|--------|-------------------------|-------------------------|------------------------|-----|
| 4 | N-Peru | ALP-22 | <i>Fabaceae</i>         | <i>Andira</i>           | <i>macrothyrsa</i>     | 714 |
| 4 | N-Peru | ALP-22 | <i>Olacaceae</i>        | <i>Schoepfia</i>        | <i>lucida</i>          | 826 |
| 4 | N-Peru | ALP-22 | <i>Moraceae</i>         | <i>Pseudolmedia</i>     | <i>laevis</i>          | 726 |
| 4 | N-Peru | ALP-22 | <i>Myristicaceae</i>    | <i>Iryanthera</i>       | <i>juruiensis</i>      | 625 |
| 4 | N-Peru | ALP-22 | <i>indet</i>            | <i>indet</i>            | <i>indet</i>           | 761 |
| 4 | N-Peru | ALP-22 | <i>Urticaceae</i>       | <i>Pourouma</i>         | <i>guianensis</i>      | 569 |
| 4 | N-Peru | ALP-22 | <i>Fabaceae</i>         | <i>Swartzia</i>         | <i>brachyrachis</i>    | 693 |
| 4 | N-Peru | ALP-22 | <i>Fabaceae</i>         | <i>Cynometra</i>        | <i>bauhiniifolia</i>   | 685 |
| 4 | N-Peru | ALP-22 | <i>Fabaceae</i>         | <i>Inga</i>             | <i>acrocephala</i>     | 694 |
| 4 | N-Peru | ALP-30 | <i>Fabaceae</i>         | <i>Tachigali</i>        | <i>tessmannii</i>      | 754 |
| 4 | N-Peru | ALP-30 | <i>Apocynaceae</i>      | <i>Aspidosperma</i>     | <i>schultesii</i>      | 899 |
| 4 | N-Peru | ALP-30 | <i>Fabaceae</i>         | <i>Pterocarpus</i>      | <i>rohrii</i>          | 791 |
| 4 | N-Peru | ALP-30 | <i>Myristicaceae</i>    | <i>Virola</i>           | <i>pavonis</i>         | 756 |
| 4 | N-Peru | ALP-30 | <i>Fabaceae</i>         | <i>Tachigali</i>        | <i>paniculata</i>      | 796 |
| 4 | N-Peru | ALP-30 | <i>Fabaceae</i>         | <i>Hymenolobium</i>     | <i>nitidum</i>         | 753 |
| 4 | N-Peru | ALP-30 | <i>Fabaceae</i>         | <i>Macrolobium</i>      | <i>microcalyx</i>      | 745 |
| 4 | N-Peru | ALP-30 | <i>Fabaceae</i>         | <i>Macrolobium</i>      | <i>microcalyx</i>      | 728 |
| 4 | N-Peru | ALP-30 | <i>Humiriaceae</i>      | <i>Sacoglottis</i>      | <i>indet</i>           | 743 |
| 4 | N-Peru | ALP-30 | <i>Lauraceae</i>        | <i>Pleurothyrium</i>    | <i>indet</i>           | 646 |
| 4 | N-Peru | ALP-30 | <i>Fabaceae</i>         | <i>Hymenolobium</i>     | <i>indet</i>           | 776 |
| 4 | N-Peru | ALP-30 | <i>Fabaceae</i>         | <i>Abarema</i>          | <i>adenophora</i>      | 791 |
| 4 | N-Peru | JEN-11 | <i>Chrysobalanaceae</i> | <i>Couepia</i>          | <i>williamsii</i>      | 812 |
| 4 | N-Peru | JEN-11 | <i>Myristicaceae</i>    | <i>Iryanthera</i>       | <i>tricornis</i>       | 631 |
| 4 | N-Peru | JEN-11 | <i>Moraceae</i>         | <i>Olmedia</i>          | <i>tomentosa</i>       | 541 |
| 4 | N-Peru | JEN-11 | <i>Myristicaceae</i>    | <i>Osteophloeum</i>     | <i>platyspermum</i>    | 499 |
| 4 | N-Peru | JEN-11 | <i>Myristicaceae</i>    | <i>Osteophloeum</i>     | <i>platyspermum</i>    | 413 |
| 4 | N-Peru | JEN-11 | <i>Rhizophoraceae</i>   | <i>Sterigma petalum</i> | <i>obovatum</i>        | 550 |
| 4 | N-Peru | JEN-11 | <i>Melastomataceae</i>  | <i>Mouriri</i>          | <i>nigra</i>           | 917 |
| 4 | N-Peru | JEN-11 | <i>Moraceae</i>         | <i>Pseudolmedia</i>     | <i>laevigata</i>       | 579 |
| 4 | N-Peru | JEN-11 | <i>Lauraceae</i>        | <i>Sextonia</i>         | <i>indet</i>           | 757 |
| 4 | N-Peru | JEN-11 | <i>Burseraceae</i>      | <i>Protium</i>          | <i>indet</i>           | 658 |
| 4 | N-Peru | JEN-11 | <i>Lauraceae</i>        | <i>indet</i>            | <i>indet</i>           | 757 |
| 4 | N-Peru | JEN-11 | <i>Lauraceae</i>        | <i>Indet</i>            | <i>indet</i>           | 654 |
| 4 | N-Peru | JEN-11 | <i>Annonaceae</i>       | <i>Guatteria</i>        | <i>indet</i>           | 741 |
| 4 | N-Peru | JEN-11 | <i>Annonaceae</i>       | <i>Guatteria</i>        | <i>indet</i>           | 436 |
| 4 | N-Peru | JEN-11 | <i>Lecythydaceae</i>    | <i>Eschweilera</i>      | <i>indet</i>           | 640 |
| 4 | N-Peru | JEN-11 | <i>Olacaceae</i>        | <i>Aptandra</i>         | <i>indet</i>           | 706 |
| 4 | N-Peru | JEN-11 | <i>Chrysobalanaceae</i> | <i>Licania</i>          | <i>heteromorpha</i>    | 866 |
| 4 | N-Peru | JEN-11 | <i>Euphorbiaceae</i>    | <i>Maprounea</i>        | <i>guianensis</i>      | 602 |
| 4 | N-Peru | JEN-11 | <i>Lecythydaceae</i>    | <i>Eschweilera</i>      | <i>coriacea</i>        | 759 |
| 4 | N-Peru | JEN-12 | <i>Euphorbiaceae</i>    | <i>Micrandra</i>        | <i>spruceana</i>       | 737 |
| 4 | N-Peru | JEN-12 | <i>Apocynaceae</i>      | <i>Aspidosperma</i>     | <i>schultesii</i>      | 856 |
| 4 | N-Peru | JEN-12 | <i>Fabaceae</i>         | <i>Tachigali</i>        | <i>paniculata</i>      | 734 |
| 4 | N-Peru | JEN-12 | <i>Fabaceae</i>         | <i>Taralea</i>          | <i>oppositifolia</i>   | 745 |
| 4 | N-Peru | JEN-12 | <i>Fabaceae</i>         | <i>Macrolobium</i>      | <i>microcalyx</i>      | 764 |
| 4 | N-Peru | JEN-12 | <i>Annonaceae</i>       | <i>Bocageopsis</i>      | <i>mattogrossensis</i> | 615 |
| 4 | N-Peru | JEN-12 | <i>Fabaceae</i>         | <i>Swartzia</i>         | <i>indet</i>           | 800 |
| 4 | N-Peru | JEN-12 | <i>Fabaceae</i>         | <i>Parkia</i>           | <i>indet</i>           | 673 |
| 4 | N-Peru | JEN-12 | <i>Euphorbiaceae</i>    | <i>Hevea</i>            | <i>indet</i>           | 675 |
| 4 | N-Peru | JEN-12 | <i>Euphorbiaceae</i>    | <i>Hevea</i>            | <i>indet</i>           | 645 |
| 4 | N-Peru | JEN-12 | <i>Icacinaceae</i>      | <i>Emmotum</i>          | <i>floribundum</i>     | 717 |
| 4 | N-Peru | JEN-12 | <i>Apocynaceae</i>      | <i>Mucoa</i>            | <i>duckei</i>          | 611 |
| 4 | N-Peru | JEN-12 | <i>Apocynaceae</i>      | <i>Aspidosperma</i>     | <i>desmanthum</i>      | 789 |
| 4 | N-Peru | JEN-12 | <i>Clusiaceae</i>       | <i>Haploclathra</i>     | <i>cordata</i>         | 947 |

|   |        |        |                         |                       |                         |      |
|---|--------|--------|-------------------------|-----------------------|-------------------------|------|
| 4 | N-Peru | JEN-12 | <i>Clusiaceae</i>       | <i>Haploclathra</i>   | <i>cordata</i>          | 866  |
| 4 | N-Peru | JEN-12 | <i>Clusiaceae</i>       | <i>Haploclathra</i>   | <i>cordata</i>          | 764  |
| 4 | N-Peru | JEN-12 | <i>Clusiaceae</i>       | <i>Tovomita</i>       | <i>calophyllophylla</i> | 1044 |
| 4 | N-Peru | JEN-12 | <i>Fabaceae</i>         | <i>Macrolobium</i>    | <i>angustifolium</i>    | 649  |
| 4 | N-Peru | JEN-12 | <i>Fabaceae</i>         | <i>Macrolobium</i>    | <i>angustifolium</i>    | 615  |
| 4 | N-Peru | JEN-12 | <i>Lauraceae</i>        | <i>Ocotea</i>         | <i>aciphylla</i>        | 678  |
| 4 | N-Peru | SUC-01 | <i>Melastomataceae</i>  | <i>Miconia</i>        | <i>symplectocaulos</i>  | 648  |
| 4 | N-Peru | SUC-01 | <i>Myristicaceae</i>    | <i>Virola</i>         | <i>sebifera</i>         | 514  |
| 4 | N-Peru | SUC-01 | <i>Sapotaceae</i>       | <i>Pouteria</i>       | <i>rostrata</i>         | 810  |
| 4 | N-Peru | SUC-01 | <i>Sapotaceae</i>       | <i>Pouteria</i>       | <i>retinervis</i>       | 793  |
| 4 | N-Peru | SUC-01 | <i>Myristicaceae</i>    | <i>Virola</i>         | <i>pavonis</i>          | 538  |
| 4 | N-Peru | SUC-01 | <i>Myristicaceae</i>    | <i>Virola</i>         | <i>pavonis</i>          | 486  |
| 4 | N-Peru | SUC-01 | <i>Fabaceae</i>         | <i>Parkia</i>         | <i>nitida</i>           | 733  |
| 4 | N-Peru | SUC-01 | <i>Annonaceae</i>       | <i>Tetrameranthus</i> | <i>laomae</i>           | 643  |
| 4 | N-Peru | SUC-01 | <i>Myristicaceae</i>    | <i>Iryanthera</i>     | <i>laevis</i>           | 499  |
| 4 | N-Peru | SUC-01 | <i>Lecythydaceae</i>    | <i>Eschweilera</i>    | <i>itayensis</i>        | 632  |
| 4 | N-Peru | SUC-01 | <i>Lepidobotryaceae</i> | <i>Ruptiliocarpon</i> | <i>indet</i>            | 491  |
| 4 | N-Peru | SUC-01 | <i>Olacaceae</i>        | <i>Chaunochiton</i>   | <i>indet</i>            | 649  |
| 4 | N-Peru | SUC-01 | <i>Myristicaceae</i>    | <i>Otoba</i>          | <i>glycycarpa</i>       | 515  |
| 4 | N-Peru | SUC-01 | <i>Burseraceae</i>      | <i>Protium</i>        | <i>glabrescens</i>      | 673  |
| 4 | N-Peru | SUC-01 | <i>Moraceae</i>         | <i>Naucleopsis</i>    | <i>glabra</i>           | 760  |
| 4 | N-Peru | SUC-01 | <i>Humiriaceae</i>      | <i>Sacoglottis</i>    | <i>ceratocarpa</i>      | 825  |
| 4 | N-Peru | SUC-01 | <i>Chrysobalanaceae</i> | <i>Licania</i>        | <i>britteniana</i>      | 728  |
| 4 | N-Peru | SUC-01 | <i>Urticaceae</i>       | <i>Pourouma</i>       | <i>bicolor</i>          | 533  |
| 4 | N-Peru | SUC-01 | <i>Malvaceae</i>        | <i>Sterculia</i>      | <i>apeibophylla</i>     | 489  |
| 4 | N-Peru | SUC-02 | <i>Chrysobalanaceae</i> | <i>Licania</i>        | <i>unguiculata</i>      | 738  |
| 4 | N-Peru | SUC-02 | <i>Moraceae</i>         | <i>Clarisia</i>       | <i>racemosa</i>         | 587  |
| 4 | N-Peru | SUC-02 | <i>Rhizophoraceae</i>   | <i>Cassipourea</i>    | <i>peruviana</i>        | 711  |
| 4 | N-Peru | SUC-02 | <i>Burseraceae</i>      | <i>Protium</i>        | <i>opacum</i>           | 610  |
| 4 | N-Peru | SUC-02 | <i>Bignoniaceae</i>     | <i>Jacaranda</i>      | <i>obtusifolia</i>      | 615  |
| 4 | N-Peru | SUC-02 | <i>Myristicaceae</i>    | <i>Iryanthera</i>     | <i>juruensis</i>        | 574  |
| 4 | N-Peru | SUC-02 | <i>Chrysobalanaceae</i> | <i>Licania</i>        | <i>harlingii</i>        | 809  |
| 4 | N-Peru | SUC-02 | <i>Lecythydaceae</i>    | <i>Couratari</i>      | <i>guianensis</i>       | 709  |
| 4 | N-Peru | SUC-02 | <i>Moraceae</i>         | <i>Naucleopsis</i>    | <i>glabra</i>           | 714  |
| 4 | N-Peru | SUC-02 | <i>Lecythydaceae</i>    | <i>Eschweilera</i>    | <i>gigantea</i>         | 650  |
| 4 | N-Peru | SUC-02 | <i>Burseraceae</i>      | <i>Protium</i>        | <i>gallosum</i>         | 596  |
| 4 | N-Peru | SUC-02 | <i>Myristicaceae</i>    | <i>Virola</i>         | <i>calophylla</i>       | 585  |
| 4 | N-Peru | SUC-02 | <i>Lauraceae</i>        | <i>Anaueria</i>       | <i>brasiliensis</i>     | 631  |
| 4 | N-Peru | SUC-02 | <i>Chrysobalanaceae</i> | <i>Licania</i>        | <i>blackii</i>          | 864  |
| 4 | N-Peru | SUC-02 | <i>Urticaceae</i>       | <i>Pourouma</i>       | <i>bicolor</i>          | 586  |
| 4 | N-Peru | SUC-02 | <i>Burseraceae</i>      | <i>Protium</i>        | <i>aracouchini</i>      | 565  |
| 4 | N-Peru | SUC-03 | <i>Apocynaceae</i>      | <i>Malouetia</i>      | <i>tamaquarina</i>      | 725  |
| 4 | N-Peru | SUC-03 | <i>Myristicaceae</i>    | <i>Virola</i>         | <i>surinamensis</i>     | 497  |
| 4 | N-Peru | SUC-03 | <i>Fabaceae</i>         | <i>Cynometra</i>      | <i>spruceana</i>        | 733  |
| 4 | N-Peru | SUC-03 | <i>Apocynaceae</i>      | <i>Aspidosperma</i>   | <i>schultesii</i>       | 932  |
| 4 | N-Peru | SUC-03 | <i>Lecythydaceae</i>    | <i>Eschweilera</i>    | <i>parvifolia</i>       | 676  |
| 4 | N-Peru | SUC-03 | <i>Euphorbiaceae</i>    | <i>Mabea</i>          | <i>occidentalis</i>     | 676  |
| 4 | N-Peru | SUC-03 | <i>Chrysobalanaceae</i> | <i>Licania</i>        | <i>licaniiiflora</i>    | 649  |
| 4 | N-Peru | SUC-03 | <i>Chrysobalanaceae</i> | <i>Licania</i>        | <i>licaniiiflora</i>    | 598  |
| 4 | N-Peru | SUC-03 | <i>Moraceae</i>         | <i>Brosimum</i>       | <i>lactescens</i>       | 655  |
| 4 | N-Peru | SUC-03 | <i>Moraceae</i>         | <i>Brosimum</i>       | <i>lactescens</i>       | 628  |
| 4 | N-Peru | SUC-03 | <i>Sapotaceae</i>       | <i>Pouteria</i>       | <i>gomphiifolia</i>     | 661  |
| 4 | N-Peru | SUC-03 | <i>Sapotaceae</i>       | <i>Pouteria</i>       | <i>gomphiifolia</i>     | 637  |
| 4 | N-Peru | SUC-03 | <i>Sapotaceae</i>       | <i>Pouteria</i>       | <i>gomphiifolia</i>     | 579  |

|   |                  |        |                       |                      |                       |      |
|---|------------------|--------|-----------------------|----------------------|-----------------------|------|
| 4 | N-Peru           | SUC-03 | <i>Apocynaceae</i>    | <i>Aspidosperma</i>  | <i>excelsum</i>       | 840  |
| 4 | N-Peru           | SUC-03 | <i>Clusiaceae</i>     | <i>Caraipa</i>       | <i>densifolia</i>     | 635  |
| 4 | N-Peru           | SUC-03 | <i>Fabaceae</i>       | <i>Campsiandra</i>   | <i>angustifolia</i>   | 1019 |
| 4 | N-Peru           | SUC-03 | <i>Fabaceae</i>       | <i>Campsiandra</i>   | <i>angustifolia</i>   | 716  |
| 4 | N-Peru           | SUC-03 | <i>Fabaceae</i>       | <i>Campsiandra</i>   | <i>angustifolia</i>   | 639  |
| 4 | N-Peru           | SUC-04 | <i>Annonaceae</i>     | <i>Duguetia</i>      | <i>stenantha</i>      | 606  |
| 4 | N-Peru           | SUC-04 | <i>Moraceae</i>       | <i>Helicostylis</i>  | <i>scabra</i>         | 631  |
| 4 | N-Peru           | SUC-04 | <i>Lauraceae</i>      | <i>Nectandra</i>     | <i>rubrinervis</i>    | 688  |
| 4 | N-Peru           | SUC-04 | <i>Moraceae</i>       | <i>Brosimum</i>      | <i>potabile</i>       | 569  |
| 4 | N-Peru           | SUC-04 | <i>Lecythidaceae</i>  | <i>Lecythis</i>      | <i>pisonis</i>        | 632  |
| 4 | N-Peru           | SUC-04 | <i>Myristicaceae</i>  | <i>Virola</i>        | <i>pavonis</i>        | 571  |
| 4 | N-Peru           | SUC-04 | <i>Burseraceae</i>    | <i>Dacryodes</i>     | <i>nitens</i>         | 693  |
| 4 | N-Peru           | SUC-04 | <i>Annonaceae</i>     | <i>Xylopia</i>       | <i>micans</i>         | 707  |
| 4 | N-Peru           | SUC-04 | <i>Fabaceae</i>       | <i>Macrolobium</i>   | <i>limbatum</i>       | 573  |
| 4 | N-Peru           | SUC-04 | <i>Moraceae</i>       | <i>Pseudolmedia</i>  | <i>laevis</i>         | 539  |
| 4 | N-Peru           | SUC-04 | <i>Humiriaceae</i>    | <i>Vantanea</i>      | <i>indet</i>          | 778  |
| 4 | N-Peru           | SUC-04 | <i>Humiriaceae</i>    | <i>Vantanea</i>      | <i>indet</i>          | 765  |
| 4 | N-Peru           | SUC-04 | <i>Sapotaceae</i>     | <i>Micropholis</i>   | <i>guyanensis</i>     | 666  |
| 4 | N-Peru           | SUC-04 | <i>Anacardiaceae</i>  | <i>Tapirira</i>      | <i>guianensis</i>     | 703  |
| 4 | N-Peru           | SUC-04 | <i>Clusiaceae</i>     | <i>Symphonia</i>     | <i>globulifera</i>    | 747  |
| 4 | N-Peru           | SUC-04 | <i>Burseraceae</i>    | <i>Protium</i>       | <i>glabrescens</i>    | 685  |
| 4 | N-Peru           | SUC-04 | <i>Lauraceae</i>      | <i>Ocotea</i>        | <i>cernua</i>         | 724  |
| 4 | N-Peru           | SUC-04 | <i>Lauraceae</i>      | <i>Anaueria</i>      | <i>brasiliensis</i>   | 549  |
| 4 | N-Peru           | SUC-04 | <i>Lecythidaceae</i>  | <i>Eschweilera</i>   | <i>bracteosa</i>      | 742  |
| 4 | N-Peru           | SUC-04 | <i>Burseraceae</i>    | <i>Protium</i>       | <i>altsonii</i>       | 571  |
| 4 | N-Peru           | YAN-01 | <i>Rubiaceae</i>      | <i>Chimarrhis</i>    | <i>williamsii</i>     | 644  |
| 4 | N-Peru           | YAN-01 | <i>Sapotaceae</i>     | <i>Chrysophyllum</i> | <i>venezuelanense</i> | 541  |
| 4 | N-Peru           | YAN-01 | <i>Fabaceae</i>       | <i>Erythrina</i>     | <i>ulei</i>           | 491  |
| 4 | N-Peru           | YAN-01 | <i>Elaeocarpaceae</i> | <i>Dasynema</i>      | <i>pubescens</i>      | 654  |
| 4 | N-Peru           | YAN-01 | <i>Icacinaceae</i>    | <i>Dendrobangia</i>  | <i>multinervia</i>    | 670  |
| 4 | N-Peru           | YAN-01 | <i>Sapotaceae</i>     | <i>Pouteria</i>      | <i>indet</i>          | 725  |
| 4 | N-Peru           | YAN-01 | <i>Lauraceae</i>      | <i>Nectandra</i>     | <i>indet</i>          | 502  |
| 4 | N-Peru           | YAN-01 | <i>Moraceae</i>       | <i>Brosimum</i>      | <i>guianense</i>      | 661  |
| 4 | N-Peru           | YAN-01 | <i>Myristicaceae</i>  | <i>Otoba</i>         | <i>glycycarpa</i>     | 487  |
| 4 | N-Peru           | YAN-01 | <i>Myristicaceae</i>  | <i>Otoba</i>         | <i>glycycarpa</i>     | 430  |
| 4 | N-Peru           | YAN-01 | <i>Euphorbiaceae</i>  | <i>Sapium</i>        | <i>glandulosum</i>    | 561  |
| 4 | N-Peru           | YAN-01 | <i>Rosaceae</i>       | <i>Prunus</i>        | <i>detrita</i>        | 654  |
| 4 | N-Peru           | YAN-01 | <i>Bignoniaceae</i>   | <i>Jacaranda</i>     | <i>copaia</i>         | 581  |
| 4 | N-Peru           | YAN-01 | <i>Fabaceae</i>       | <i>Ormosia</i>       | <i>bopiensis</i>      | 476  |
| 4 | N-Peru           | YAN-01 | <i>Malvaceae</i>      | <i>Apeiba</i>        | <i>aspera</i>         | 511  |
| 4 | N-Peru           | YAN-01 | <i>Malvaceae</i>      | <i>Apeiba</i>        | <i>aspera</i>         | 392  |
| 4 | N-Peru           | YAN-01 | <i>Fabaceae</i>       | <i>Inga</i>          | <i>aria</i>           | 702  |
| 4 | N-Peru           | YAN-02 | <i>Nyctaginaceae</i>  | <i>Neea</i>          | <i>spruceana</i>      | 597  |
| 4 | N-Peru           | YAN-02 | <i>Myristicaceae</i>  | <i>Otoba</i>         | <i>parvifolia</i>     | 510  |
| 4 | N-Peru           | YAN-02 | <i>Moraceae</i>       | <i>Ficus</i>         | <i>insipida</i>       | 448  |
| 4 | N-Peru           | YAN-02 | <i>Salicaceae</i>     | <i>Hasseltia</i>     | <i>indet</i>          | 612  |
| 4 | N-Peru           | YAN-02 | <i>Rubiaceae</i>      | <i>Chimarrhis</i>    | <i>glabriflora</i>    | 488  |
| 4 | N-Peru           | YAN-02 | <i>Myristicaceae</i>  | <i>Virola</i>        | <i>duckei</i>         | 448  |
| 4 | N-Peru           | YAN-02 | <i>Urticaceae</i>     | <i>Pourouma</i>      | <i>cecropiifolia</i>  | 493  |
| 4 | N-Peru           | YAN-02 | <i>Malvaceae</i>      | <i>Sterculia</i>     | <i>apeibophylla</i>   | 574  |
| 3 | S-Peru&AC-Brazil | CUZ-03 | <i>Meliaceae</i>      | <i>Trichilia</i>     | <i>adolphi</i>        | 631  |
| 3 | S-Peru&AC-Brazil | CUZ-03 | <i>Annonaceae</i>     | <i>Oxandra</i>       | <i>acuminata</i>      | 607  |
| 3 | S-Peru&AC-Brazil | CUZ-03 | <i>Malvaceae</i>      | <i>Quararibea</i>    | <i>wittii</i>         | 588  |
| 3 | S-Peru&AC-Brazil | CUZ-03 | <i>Malvaceae</i>      | <i>Quararibea</i>    | <i>wittii</i>         | 447  |

|   |                  |        |                      |                       |                     |     |
|---|------------------|--------|----------------------|-----------------------|---------------------|-----|
| 3 | S-Peru&AC-Brazil | CUZ-03 | <i>Sapotaceae</i>    | <i>Pouteria</i>       | <i>torta</i>        | 610 |
| 3 | S-Peru&AC-Brazil | CUZ-03 | <i>Lauraceae</i>     | <i>Aniba</i>          | <i>terminalis</i>   | 496 |
| 3 | S-Peru&AC-Brazil | CUZ-03 | <i>Lauraceae</i>     | <i>Aniba</i>          | <i>taubertiana</i>  | 604 |
| 3 | S-Peru&AC-Brazil | CUZ-03 | <i>Polygonaceae</i>  | <i>Triplaris</i>      | <i>poeppigiana</i>  | 413 |
| 3 | S-Peru&AC-Brazil | CUZ-03 | <i>Staphyleaceae</i> | <i>Turpinia</i>       | <i>occidentalis</i> | 458 |
| 3 | S-Peru&AC-Brazil | CUZ-03 | <i>Fabaceae</i>      | <i>Inga</i>           | <i>laurina</i>      | 584 |
| 3 | S-Peru&AC-Brazil | CUZ-03 | <i>Fabaceae</i>      | <i>Inga</i>           | <i>laurina</i>      | 563 |
| 3 | S-Peru&AC-Brazil | CUZ-03 | <i>Moraceae</i>      | <i>Pseudolmedia</i>   | <i>laevis</i>       | 652 |
| 3 | S-Peru&AC-Brazil | CUZ-03 | <i>Moraceae</i>      | <i>Pseudolmedia</i>   | <i>laevis</i>       | 602 |
| 3 | S-Peru&AC-Brazil | CUZ-03 | <i>Moraceae</i>      | <i>Pseudolmedia</i>   | <i>laevis</i>       | 573 |
| 3 | S-Peru&AC-Brazil | CUZ-03 | <i>Moraceae</i>      | <i>Pseudolmedia</i>   | <i>laevis</i>       | 560 |
| 3 | S-Peru&AC-Brazil | CUZ-03 | <i>indet</i>         | <i>indet</i>          | <i>indet</i>        | 615 |
| 3 | S-Peru&AC-Brazil | CUZ-03 | <i>Olacaceae</i>     | <i>Minquartia</i>     | <i>guianensis</i>   | 580 |
| 3 | S-Peru&AC-Brazil | CUZ-03 | <i>Lauraceae</i>     | <i>Aniba</i>          | <i>guianensis</i>   | 505 |
| 3 | S-Peru&AC-Brazil | CUZ-03 | <i>Sapotaceae</i>    | <i>Pouteria</i>       | <i>ephedrantha</i>  | 687 |
| 3 | S-Peru&AC-Brazil | CUZ-03 | <i>Fabaceae</i>      | <i>Inga</i>           | <i>bourgonii</i>    | 514 |
| 3 | S-Peru&AC-Brazil | CUZ-03 | <i>Moraceae</i>      | <i>Clarisia</i>       | <i>biflora</i>      | 606 |
| 3 | S-Peru&AC-Brazil | CUZ-03 | <i>Fabaceae</i>      | <i>Toluidifera</i>    | <i>balsamum</i>     | 662 |
| 3 | S-Peru&AC-Brazil | CUZ-03 | <i>Euphorbiaceae</i> | <i>Drypetes</i>       | <i>amazonica</i>    | 613 |
| 3 | S-Peru&AC-Brazil | DOI-01 | <i>Rutaceae</i>      | <i>Galipea</i>        | <i>trifoliata</i>   | 607 |
| 3 | S-Peru&AC-Brazil | DOI-01 | <i>Verbenaceae</i>   | <i>Vitex</i>          | <i>triflora</i>     | 624 |
| 3 | S-Peru&AC-Brazil | DOI-01 | <i>Olacaceae</i>     | <i>Heisteria</i>      | <i>ovata</i>        | 750 |
| 3 | S-Peru&AC-Brazil | DOI-01 | <i>Meliaceae</i>     | <i>Swietenia</i>      | <i>macrophylla</i>  | 609 |
| 3 | S-Peru&AC-Brazil | DOI-01 | <i>Moraceae</i>      | <i>Pseudolmedia</i>   | <i>laevis</i>       | 598 |
| 3 | S-Peru&AC-Brazil | DOI-01 | <i>Monimiaceae</i>   | <i>Siparuna</i>       | <i>indet</i>        | 669 |
| 3 | S-Peru&AC-Brazil | DOI-01 | <i>Sapotaceae</i>    | <i>Pouteria</i>       | <i>indet</i>        | 567 |
| 3 | S-Peru&AC-Brazil | DOI-01 | <i>Sapindaceae</i>   | <i>Matayba</i>        | <i>indet</i>        | 621 |
| 3 | S-Peru&AC-Brazil | DOI-01 | <i>indet</i>         | <i>indet</i>          | <i>indet</i>        | 530 |
| 3 | S-Peru&AC-Brazil | DOI-01 | <i>Fabaceae</i>      | <i>Dialium</i>        | <i>guianense</i>    | 653 |
| 3 | S-Peru&AC-Brazil | DOI-01 | <i>Fabaceae</i>      | <i>Dialium</i>        | <i>guianense</i>    | 627 |
| 3 | S-Peru&AC-Brazil | DOI-01 | <i>Nyctaginaceae</i> | <i>Neea</i>           | <i>cauliflora</i>   | 746 |
| 3 | S-Peru&AC-Brazil | DOI-01 | <i>Moraceae</i>      | <i>Sorocea</i>        | <i>briquetii</i>    | 656 |
| 3 | S-Peru&AC-Brazil | DOI-01 | <i>Burseraceae</i>   | <i>Tetragastris</i>   | <i>altissima</i>    | 649 |
| 3 | S-Peru&AC-Brazil | DOI-01 | <i>Burseraceae</i>   | <i>Tetragastris</i>   | <i>altissima</i>    | 538 |
| 3 | S-Peru&AC-Brazil | DOI-01 | <i>Burseraceae</i>   | <i>Tetragastris</i>   | <i>altissima</i>    | 498 |
| 3 | S-Peru&AC-Brazil | DOI-01 | <i>Burseraceae</i>   | <i>Tetragastris</i>   | <i>altissima</i>    | 461 |
| 3 | S-Peru&AC-Brazil | DOI-01 | <i>Moraceae</i>      | <i>Brosimum</i>       | <i>alicastrum</i>   | 623 |
| 3 | S-Peru&AC-Brazil | DOI-02 | <i>Apocynaceae</i>   | <i>Aspidosperma</i>   | <i>ulei</i>         | 590 |
| 3 | S-Peru&AC-Brazil | DOI-02 | <i>Rutaceae</i>      | <i>Zanthoxylum</i>    | <i>rhoifolium</i>   | 521 |
| 3 | S-Peru&AC-Brazil | DOI-02 | <i>Burseraceae</i>   | <i>Crepidosperrum</i> | <i>rhoifolium</i>   | 575 |
| 3 | S-Peru&AC-Brazil | DOI-02 | <i>Apocynaceae</i>   | <i>Aspidosperma</i>   | <i>parvifolium</i>  | 528 |
| 3 | S-Peru&AC-Brazil | DOI-02 | <i>Lecythydaceae</i> | <i>Eschweilera</i>    | <i>parvifolia</i>   | 588 |
| 3 | S-Peru&AC-Brazil | DOI-02 | <i>Fabaceae</i>      | <i>Tachigali</i>      | <i>paniculata</i>   | 546 |
| 3 | S-Peru&AC-Brazil | DOI-02 | <i>Meliaceae</i>     | <i>Cedrela</i>        | <i>odorata</i>      | 542 |
| 3 | S-Peru&AC-Brazil | DOI-02 | <i>Fabaceae</i>      | <i>Hymenaea</i>       | <i>oblongifolia</i> | 627 |
| 3 | S-Peru&AC-Brazil | DOI-02 | <i>Annonaceae</i>    | <i>Onychopetalum</i>  | <i>krukoffii</i>    | 392 |
| 3 | S-Peru&AC-Brazil | DOI-02 | <i>Lauraceae</i>     | <i>Mezilaurus</i>     | <i>itauba</i>       | 496 |
| 3 | S-Peru&AC-Brazil | DOI-02 | <i>Sapotaceae</i>    | <i>Manilkara</i>      | <i>inundata</i>     | 557 |
| 3 | S-Peru&AC-Brazil | DOI-02 | <i>Sapotaceae</i>    | <i>Pouteria</i>       | <i>indet</i>        | 700 |
| 3 | S-Peru&AC-Brazil | DOI-02 | <i>Sapotaceae</i>    | <i>Pouteria</i>       | <i>indet</i>        | 589 |
| 3 | S-Peru&AC-Brazil | DOI-02 | <i>Fabaceae</i>      | <i>Piptadenia</i>     | <i>indet</i>        | 473 |
| 3 | S-Peru&AC-Brazil | DOI-02 | <i>indet</i>         | <i>indet</i>          | <i>indet</i>        | 541 |
| 3 | S-Peru&AC-Brazil | DOI-02 | <i>Rutaceae</i>      | <i>Metrodorea</i>     | <i>flavida</i>      | 660 |
| 3 | S-Peru&AC-Brazil | DOI-02 | <i>Malvaceae</i>     | <i>Matisia</i>        | <i>cordata</i>      | 326 |



|   |                  |        |                  |                |               |     |
|---|------------------|--------|------------------|----------------|---------------|-----|
| 3 | S-Peru&AC-Brazil | DOI-02 | Salicaceae       | Casearia       | arborea       | 671 |
| 3 | S-Peru&AC-Brazil | JUR-01 | Sapindaceae      | Talisia        | indet         | 643 |
| 3 | S-Peru&AC-Brazil | JUR-01 | Violaceae        | Rinoreaocarpus | indet         | 722 |
| 3 | S-Peru&AC-Brazil | JUR-01 | Lauraceae        | Ocotea         | indet         | 570 |
| 3 | S-Peru&AC-Brazil | JUR-01 | Moraceae         | Maquira        | indet         | 348 |
| 3 | S-Peru&AC-Brazil | JUR-01 | Sapotaceae       | Manilkara      | indet         | 719 |
| 3 | S-Peru&AC-Brazil | JUR-01 | Fabaceae         | Macrobium      | indet         | 639 |
| 3 | S-Peru&AC-Brazil | JUR-01 | Salicaceae       | Lunania        | indet         | 656 |
| 3 | S-Peru&AC-Brazil | JUR-01 | Meliaceae        | indet          | indet         | 789 |
| 3 | S-Peru&AC-Brazil | JUR-01 | Sapotaceae       | indet          | indet         | 635 |
| 3 | S-Peru&AC-Brazil | JUR-01 | Lauraceae        | indet          | indet         | 599 |
| 3 | S-Peru&AC-Brazil | JUR-01 | Rubiaceae        | indet          | indet         | 544 |
| 3 | S-Peru&AC-Brazil | JUR-01 | Olacaceae        | Heisteria      | indet         | 678 |
| 3 | S-Peru&AC-Brazil | JUR-01 | Apocynaceae      | Aspidosperma   | indet         | 706 |
| 3 | S-Peru&AC-Brazil | POR-01 | Euphorbiaceae    | Nealchornea    | yapurensis    | 645 |
| 3 | S-Peru&AC-Brazil | POR-01 | Euphorbiaceae    | Nealchornea    | yapurensis    | 584 |
| 3 | S-Peru&AC-Brazil | POR-01 | Salicaceae       | Banara         | nitida        | 571 |
| 3 | S-Peru&AC-Brazil | POR-01 | Moraceae         | Pseudolmedia   | murure        | 574 |
| 3 | S-Peru&AC-Brazil | POR-01 | Sapotaceae       | Chrysophyllum  | lucentifolium | 600 |
| 3 | S-Peru&AC-Brazil | POR-01 | Myristicaceae    | Virola         | indet         | 523 |
| 3 | S-Peru&AC-Brazil | POR-01 | Meliaceae        | Trichilia      | indet         | 658 |
| 3 | S-Peru&AC-Brazil | POR-01 | Fabaceae         | Tachigali      | indet         | 546 |
| 3 | S-Peru&AC-Brazil | POR-01 | Annonaceae       | Onychopetalum  | indet         | 407 |
| 3 | S-Peru&AC-Brazil | POR-01 | Lauraceae        | Ocotea         | indet         | 608 |
| 3 | S-Peru&AC-Brazil | POR-01 | indet            | indet          | indet         | 482 |
| 3 | S-Peru&AC-Brazil | POR-01 | Lauraceae        | indet          | indet         | 399 |
| 3 | S-Peru&AC-Brazil | POR-01 | Malvaceae        | indet          | indet         | 282 |
| 3 | S-Peru&AC-Brazil | POR-01 | Sapotaceae       | Ecclinusa      | indet         | 580 |
| 3 | S-Peru&AC-Brazil | POR-01 | Rubiaceae        | Amaioua        | guianensis    | 622 |
| 3 | S-Peru&AC-Brazil | POR-01 | Moraceae         | Brosimum       | guianense     | 443 |
| 3 | S-Peru&AC-Brazil | POR-01 | Lecythydaceae    | Eschweilera    | coriacea      | 632 |
| 3 | S-Peru&AC-Brazil | POR-01 | Burseraceae      | Tetragastris   | altissima     | 629 |
| 3 | S-Peru&AC-Brazil | POR-01 | Burseraceae      | Tetragastris   | altissima     | 560 |
| 3 | S-Peru&AC-Brazil | POR-02 | Euphorbiaceae    | Pau            | trianae       | 604 |
| 3 | S-Peru&AC-Brazil | POR-02 | Fabaceae         | Inga           | sarmentosa    | 598 |
| 3 | S-Peru&AC-Brazil | POR-02 | Chrysobalanaceae | Licania        | miltonii      | 628 |
| 3 | S-Peru&AC-Brazil | POR-02 | Moraceae         | Pseudolmedia   | laevis        | 530 |
| 3 | S-Peru&AC-Brazil | POR-02 | Moraceae         | Brosimum       | lactescens    | 619 |
| 3 | S-Peru&AC-Brazil | POR-02 | Verbenaceae      | Vitex          | indet         | 496 |
| 3 | S-Peru&AC-Brazil | POR-02 | Meliaceae        | Trichilia      | indet         | 620 |
| 3 | S-Peru&AC-Brazil | POR-02 | Sapotaceae       | Lucuma         | indet         | 606 |
| 3 | S-Peru&AC-Brazil | POR-02 | Sapotaceae       | Lucuma         | indet         | 552 |
| 3 | S-Peru&AC-Brazil | POR-02 | Lecythydaceae    | Eschweilera    | indet         | 634 |
| 3 | S-Peru&AC-Brazil | POR-02 | Sapotaceae       | Ecclinusa      | indet         | 701 |
| 3 | S-Peru&AC-Brazil | POR-02 | Malvaceae        | Apeiba         | indet         | 315 |
| 3 | S-Peru&AC-Brazil | POR-02 | Chrysobalanaceae | Licania        | heteromorpha  | 730 |
| 3 | S-Peru&AC-Brazil | POR-02 | Olacaceae        | Minquartia     | guianensis    | 687 |
| 3 | S-Peru&AC-Brazil | POR-02 | Burseraceae      | Tetragastris   | altissima     | 530 |
| 3 | S-Peru&AC-Brazil | POR-02 | Burseraceae      | Tetragastris   | altissima     | 507 |
| 3 | S-Peru&AC-Brazil | POR-02 | Burseraceae      | Tetragastris   | altissima     | 463 |
| 3 | S-Peru&AC-Brazil | POR-02 | Burseraceae      | Tetragastris   | altissima     | 463 |
| 3 | S-Peru&AC-Brazil | POR-02 | Burseraceae      | Tetragastris   | altissima     | 432 |
| 3 | S-Peru&AC-Brazil | POR-02 | Burseraceae      | Tetragastris   | altissima     | 421 |
| 3 | S-Peru&AC-Brazil | RST-01 | Myristicaceae    | Virola         | indet         | 388 |

|   |                  |        |                      |                      |                    |     |
|---|------------------|--------|----------------------|----------------------|--------------------|-----|
| 3 | S-Peru&AC-Brazil | RST-01 | <i>Myristicaceae</i> | <i>Virola</i>        | <i>indet</i>       | 356 |
| 3 | S-Peru&AC-Brazil | RST-01 | <i>Meliaceae</i>     | <i>Trichilia</i>     | <i>indet</i>       | 662 |
| 3 | S-Peru&AC-Brazil | RST-01 | <i>Meliaceae</i>     | <i>Trichilia</i>     | <i>indet</i>       | 595 |
| 3 | S-Peru&AC-Brazil | RST-01 | <i>Fabaceae</i>      | <i>Swartzia</i>      | <i>indet</i>       | 567 |
| 3 | S-Peru&AC-Brazil | RST-01 | <i>Malvaceae</i>     | <i>Quararibea</i>    | <i>indet</i>       | 606 |
| 3 | S-Peru&AC-Brazil | RST-01 | <i>Malvaceae</i>     | <i>Quararibea</i>    | <i>indet</i>       | 526 |
| 3 | S-Peru&AC-Brazil | RST-01 | <i>Sapotaceae</i>    | <i>Micropholis</i>   | <i>indet</i>       | 597 |
| 3 | S-Peru&AC-Brazil | RST-01 | <i>Sapotaceae</i>    | <i>Micropholis</i>   | <i>indet</i>       | 550 |
| 3 | S-Peru&AC-Brazil | RST-01 | <i>Rubiaceae</i>     | <i>indet</i>         | <i>indet</i>       | 712 |
| 3 | S-Peru&AC-Brazil | RST-01 | <i>Meliaceae</i>     | <i>indet</i>         | <i>indet</i>       | 613 |
| 3 | S-Peru&AC-Brazil | RST-01 | <i>Rubiaceae</i>     | <i>indet</i>         | <i>indet</i>       | 610 |
| 3 | S-Peru&AC-Brazil | RST-01 | <i>Rubiaceae</i>     | <i>indet</i>         | <i>indet</i>       | 542 |
| 3 | S-Peru&AC-Brazil | RST-01 | <i>Olacaceae</i>     | <i>Heisteria</i>     | <i>indet</i>       | 631 |
| 3 | S-Peru&AC-Brazil | RST-01 | <i>Meliaceae</i>     | <i>Guarea</i>        | <i>indet</i>       | 646 |
| 3 | S-Peru&AC-Brazil | RST-01 | <i>Rubiaceae</i>     | <i>Chimarrhis</i>    | <i>indet</i>       | 520 |
| 3 | S-Peru&AC-Brazil | RST-01 | <i>Ulmaceae</i>      | <i>Celtis</i>        | <i>indet</i>       | 567 |
| 3 | S-Peru&AC-Brazil | RST-01 | <i>Malvaceae</i>     | <i>Ceiba</i>         | <i>indet</i>       | 573 |
| 3 | S-Peru&AC-Brazil | RST-01 | <i>Moraceae</i>      | <i>Brosimum</i>      | <i>indet</i>       | 539 |
| 3 | S-Peru&AC-Brazil | RST-01 | <i>Malvaceae</i>     | <i>Apeiba</i>        | <i>indet</i>       | 869 |
| 3 | S-Peru&AC-Brazil | TAM-01 | <i>Olacaceae</i>     | <i>Heisteria</i>     | <i>acuminata</i>   | 831 |
| 3 | S-Peru&AC-Brazil | TAM-01 | <i>Annonaceae</i>    | <i>Guatteria</i>     | <i>xylopioides</i> | 460 |
| 3 | S-Peru&AC-Brazil | TAM-01 | <i>Fabaceae</i>      | <i>Tachigali</i>     | <i>polyphylla</i>  | 689 |
| 3 | S-Peru&AC-Brazil | TAM-01 | <i>Fabaceae</i>      | <i>Tachigali</i>     | <i>polyphylla</i>  | 663 |
| 3 | S-Peru&AC-Brazil | TAM-01 | <i>Moraceae</i>      | <i>Pseudolmedia</i>  | <i>murure</i>      | 614 |
| 3 | S-Peru&AC-Brazil | TAM-01 | <i>Sapindaceae</i>   | <i>Talisia</i>       | <i>mollis</i>      | 579 |
| 3 | S-Peru&AC-Brazil | TAM-01 | <i>Urticaceae</i>    | <i>Pourouma</i>      | <i>minor</i>       | 615 |
| 3 | S-Peru&AC-Brazil | TAM-01 | <i>Moraceae</i>      | <i>Pseudolmedia</i>  | <i>macrophylla</i> | 545 |
| 3 | S-Peru&AC-Brazil | TAM-01 | <i>Moraceae</i>      | <i>Pseudolmedia</i>  | <i>macrophylla</i> | 537 |
| 3 | S-Peru&AC-Brazil | TAM-01 | <i>Moraceae</i>      | <i>Pseudolmedia</i>  | <i>laevis</i>      | 621 |
| 3 | S-Peru&AC-Brazil | TAM-01 | <i>Moraceae</i>      | <i>Brosimum</i>      | <i>lactescens</i>  | 613 |
| 3 | S-Peru&AC-Brazil | TAM-01 | <i>Moraceae</i>      | <i>Brosimum</i>      | <i>lactescens</i>  | 589 |
| 3 | S-Peru&AC-Brazil | TAM-01 | <i>Moraceae</i>      | <i>Brosimum</i>      | <i>lactescens</i>  | 516 |
| 3 | S-Peru&AC-Brazil | TAM-01 | <i>Myristicaceae</i> | <i>Iryanthera</i>    | <i>juruensis</i>   | 480 |
| 3 | S-Peru&AC-Brazil | TAM-01 | <i>Sapotaceae</i>    | <i>Manilkara</i>     | <i>inundata</i>    | 406 |
| 3 | S-Peru&AC-Brazil | TAM-01 | <i>Fabaceae</i>      | <i>Swartzia</i>      | <i>indet</i>       | 700 |
| 3 | S-Peru&AC-Brazil | TAM-01 | <i>Euphorbiaceae</i> | <i>Pera</i>          | <i>indet</i>       | 442 |
| 3 | S-Peru&AC-Brazil | TAM-01 | <i>Violaceae</i>     | <i>Leonia</i>        | <i>glycyarpa</i>   | 585 |
| 3 | S-Peru&AC-Brazil | TAM-01 | <i>Fabaceae</i>      | <i>Inga</i>          | <i>edulis</i>      | 539 |
| 3 | S-Peru&AC-Brazil | TAM-01 | <i>Sapotaceae</i>    | <i>Pouteria</i>      | <i>cuspidata</i>   | 674 |
| 3 | S-Peru&AC-Brazil | TAM-01 | <i>Moraceae</i>      | <i>Maquira</i>       | <i>calophylla</i>  | 559 |
| 3 | S-Peru&AC-Brazil | TAM-01 | <i>Fabaceae</i>      | <i>Inga</i>          | <i>bourgonii</i>   | 463 |
| 3 | S-Peru&AC-Brazil | TAM-02 | <i>Rubiaceae</i>     | <i>Calycophyllum</i> | <i>acreamum</i>    | 664 |
| 3 | S-Peru&AC-Brazil | TAM-02 | <i>Annonaceae</i>    | <i>Oxandra</i>       | <i>xylopioides</i> | 591 |
| 3 | S-Peru&AC-Brazil | TAM-02 | <i>Moraceae</i>      | <i>Castilla</i>      | <i>ulei</i>        | 472 |
| 3 | S-Peru&AC-Brazil | TAM-02 | <i>Sapotaceae</i>    | <i>Pouteria</i>      | <i>torta</i>       | 692 |
| 3 | S-Peru&AC-Brazil | TAM-02 | <i>Fabaceae</i>      | <i>Inga</i>          | <i>spectabilis</i> | 618 |
| 3 | S-Peru&AC-Brazil | TAM-02 | <i>Fabaceae</i>      | <i>Copaifera</i>     | <i>reticulata</i>  | 695 |
| 3 | S-Peru&AC-Brazil | TAM-02 | <i>Euphorbiaceae</i> | <i>Sagotia</i>       | <i>racemosa</i>    | 658 |
| 3 | S-Peru&AC-Brazil | TAM-02 | <i>Fabaceae</i>      | <i>Diploctropis</i>  | <i>purpurea</i>    | 695 |
| 3 | S-Peru&AC-Brazil | TAM-02 | <i>Burseraceae</i>   | <i>Tetragastris</i>  | <i>panamensis</i>  | 595 |
| 3 | S-Peru&AC-Brazil | TAM-02 | <i>Moraceae</i>      | <i>Pseudolmedia</i>  | <i>macrophylla</i> | 633 |
| 3 | S-Peru&AC-Brazil | TAM-02 | <i>Moraceae</i>      | <i>Pseudolmedia</i>  | <i>macrophylla</i> | 574 |
| 3 | S-Peru&AC-Brazil | TAM-02 | <i>Moraceae</i>      | <i>Pseudolmedia</i>  | <i>laevis</i>      | 762 |
| 3 | S-Peru&AC-Brazil | TAM-02 | <i>Sapotaceae</i>    | <i>Manilkara</i>     | <i>inundata</i>    | 384 |

|   |                  |        |                         |                     |                     |     |
|---|------------------|--------|-------------------------|---------------------|---------------------|-----|
| 3 | S-Peru&AC-Brazil | TAM-02 | <i>Sabiaceae</i>        | <i>Meliosma</i>     | <i>herbertii</i>    | 545 |
| 3 | S-Peru&AC-Brazil | TAM-02 | <i>Moraceae</i>         | <i>Brosimum</i>     | <i>guianense</i>    | 658 |
| 3 | S-Peru&AC-Brazil | TAM-02 | <i>Euphorbiaceae</i>    | <i>Drypetes</i>     | <i>gentryi</i>      | 752 |
| 3 | S-Peru&AC-Brazil | TAM-02 | <i>Lecythidaceae</i>    | <i>Eschweilera</i>  | <i>coriacea</i>     | 843 |
| 3 | S-Peru&AC-Brazil | TAM-02 | <i>Meliaceae</i>        | <i>Cabrlea</i>      | <i>canjerana</i>    | 428 |
| 3 | S-Peru&AC-Brazil | TAM-02 | <i>Fabaceae</i>         | <i>Sclerolobium</i> | <i>bracteosum</i>   | 616 |
| 3 | S-Peru&AC-Brazil | TAM-03 | <i>Myristicaceae</i>    | <i>Virola</i>       | <i>surinamensis</i> | 435 |
| 3 | S-Peru&AC-Brazil | TAM-03 | <i>Malvaceae</i>        | <i>Lueheopsis</i>   | <i>hoehnei</i>      | 439 |
| 3 | S-Peru&AC-Brazil | TAM-03 | <i>Malvaceae</i>        | <i>Lueheopsis</i>   | <i>hoehnei</i>      | 437 |
| 3 | S-Peru&AC-Brazil | TAM-03 | <i>Malvaceae</i>        | <i>Lueheopsis</i>   | <i>hoehnei</i>      | 430 |
| 3 | S-Peru&AC-Brazil | TAM-03 | <i>Malvaceae</i>        | <i>Lueheopsis</i>   | <i>hoehnei</i>      | 402 |
| 3 | S-Peru&AC-Brazil | TAM-03 | <i>Moraceae</i>         | <i>Maquira</i>      | <i>coriacea</i>     | 665 |
| 3 | S-Peru&AC-Brazil | TAM-04 | <i>Sapotaceae</i>       | <i>Micropholis</i>  | <i>venulosa</i>     | 697 |
| 3 | S-Peru&AC-Brazil | TAM-04 | <i>Fabaceae</i>         | <i>Tachigali</i>    | <i>rugosa</i>       | 587 |
| 3 | S-Peru&AC-Brazil | TAM-04 | <i>Melastomataceae</i>  | <i>Miconia</i>      | <i>punctata</i>     | 523 |
| 3 | S-Peru&AC-Brazil | TAM-04 | <i>Salicaceae</i>       | <i>Laetia</i>       | <i>procera</i>      | 557 |
| 3 | S-Peru&AC-Brazil | TAM-04 | <i>Fabaceae</i>         | <i>Hymenaea</i>     | <i>oblongifolia</i> | 719 |
| 3 | S-Peru&AC-Brazil | TAM-04 | <i>Urticaceae</i>       | <i>Pourouma</i>     | <i>minor</i>        | 523 |
| 3 | S-Peru&AC-Brazil | TAM-04 | <i>Moraceae</i>         | <i>Pseudolmedia</i> | <i>macrophylla</i>  | 599 |
| 3 | S-Peru&AC-Brazil | TAM-04 | <i>Moraceae</i>         | <i>Pseudolmedia</i> | <i>macrophylla</i>  | 582 |
| 3 | S-Peru&AC-Brazil | TAM-04 | <i>Moraceae</i>         | <i>Pseudolmedia</i> | <i>macrophylla</i>  | 492 |
| 3 | S-Peru&AC-Brazil | TAM-04 | <i>indet</i>            | <i>indet</i>        | <i>indet</i>        | 744 |
| 3 | S-Peru&AC-Brazil | TAM-04 | <i>Lauraceae</i>        | <i>Cinnamomum</i>   | <i>indet</i>        | 487 |
| 3 | S-Peru&AC-Brazil | TAM-04 | <i>Sabiaceae</i>        | <i>Meliosma</i>     | <i>herbertii</i>    | 510 |
| 3 | S-Peru&AC-Brazil | TAM-04 | <i>Urticaceae</i>       | <i>Pourouma</i>     | <i>cucura</i>       | 735 |
| 3 | S-Peru&AC-Brazil | TAM-04 | <i>Myristicaceae</i>    | <i>Virola</i>       | <i>calophylla</i>   | 462 |
| 3 | S-Peru&AC-Brazil | TAM-04 | <i>Burseraceae</i>      | <i>Tetragastris</i> | <i>altissima</i>    | 595 |
| 3 | S-Peru&AC-Brazil | TAM-05 | <i>Fabaceae</i>         | <i>Inga</i>         | <i>tenuistipula</i> | 651 |
| 3 | S-Peru&AC-Brazil | TAM-05 | <i>Fabaceae</i>         | <i>Enterolobium</i> | <i>schomburgkii</i> | 639 |
| 3 | S-Peru&AC-Brazil | TAM-05 | <i>Linaceae</i>         | <i>Roucheria</i>    | <i>punctata</i>     | 741 |
| 3 | S-Peru&AC-Brazil | TAM-05 | <i>Fabaceae</i>         | <i>Tachigali</i>    | <i>polyphylla</i>   | 631 |
| 3 | S-Peru&AC-Brazil | TAM-05 | <i>Malvaceae</i>        | <i>Quararibea</i>   | <i>ochrocalyx</i>   | 715 |
| 3 | S-Peru&AC-Brazil | TAM-05 | <i>Moraceae</i>         | <i>Pseudolmedia</i> | <i>laevigata</i>    | 574 |
| 3 | S-Peru&AC-Brazil | TAM-05 | <i>Moraceae</i>         | <i>Pseudolmedia</i> | <i>laevigata</i>    | 549 |
| 3 | S-Peru&AC-Brazil | TAM-05 | <i>Moraceae</i>         | <i>Trophis</i>      | <i>indet</i>        | 573 |
| 3 | S-Peru&AC-Brazil | TAM-05 | <i>Fabaceae</i>         | <i>indet</i>        | <i>indet</i>        | 798 |
| 3 | S-Peru&AC-Brazil | TAM-05 | <i>Linaceae</i>         | <i>Hebepetalum</i>  | <i>humirifolium</i> | 726 |
| 3 | S-Peru&AC-Brazil | TAM-05 | <i>Chrysobalanaceae</i> | <i>Licania</i>      | <i>heteromorpha</i> | 761 |
| 3 | S-Peru&AC-Brazil | TAM-05 | <i>Sapotaceae</i>       | <i>Micropholis</i>  | <i>guyanensis</i>   | 619 |
| 3 | S-Peru&AC-Brazil | TAM-05 | <i>Sapotaceae</i>       | <i>Micropholis</i>  | <i>guyanensis</i>   | 585 |
| 3 | S-Peru&AC-Brazil | TAM-05 | <i>Olacaceae</i>        | <i>Minquartia</i>   | <i>guianensis</i>   | 760 |
| 3 | S-Peru&AC-Brazil | TAM-05 | <i>Euphorbiaceae</i>    | <i>Hevea</i>        | <i>guianensis</i>   | 637 |
| 3 | S-Peru&AC-Brazil | TAM-05 | <i>Fabaceae</i>         | <i>Dialium</i>      | <i>guianense</i>    | 733 |
| 3 | S-Peru&AC-Brazil | TAM-05 | <i>Myristicaceae</i>    | <i>Virola</i>       | <i>calophylla</i>   | 537 |
| 3 | S-Peru&AC-Brazil | TAM-05 | <i>Lauraceae</i>        | <i>Ocotea</i>       | <i>bofo</i>         | 588 |
| 3 | S-Peru&AC-Brazil | TAM-05 | <i>Lauraceae</i>        | <i>Ocotea</i>       | <i>bofo</i>         | 517 |
| 3 | S-Peru&AC-Brazil | TAM-05 | <i>Bixaceae</i>         | <i>Bixa</i>         | <i>arborea</i>      | 498 |
| 3 | S-Peru&AC-Brazil | TAM-06 | <i>Rutaceae</i>         | <i>Zanthoxylum</i>  | <i>acranum</i>      | 489 |
| 3 | S-Peru&AC-Brazil | TAM-06 | <i>Sapotaceae</i>       | <i>Pouteria</i>     | <i>torta</i>        | 672 |
| 3 | S-Peru&AC-Brazil | TAM-06 | <i>Elaeocarpaceae</i>   | <i>Sloanea</i>      | <i>stipitata</i>    | 477 |
| 3 | S-Peru&AC-Brazil | TAM-06 | <i>Moraceae</i>         | <i>Clarisia</i>     | <i>racemosa</i>     | 556 |
| 3 | S-Peru&AC-Brazil | TAM-06 | <i>Moraceae</i>         | <i>Sorocea</i>      | <i>pileata</i>      | 562 |
| 3 | S-Peru&AC-Brazil | TAM-06 | <i>Euphorbiaceae</i>    | <i>Mabea</i>        | <i>nitida</i>       | 568 |
| 3 | S-Peru&AC-Brazil | TAM-06 | <i>Fabaceae</i>         | <i>Swartzia</i>     | <i>leptopetala</i>  | 588 |

|   |                  |        |                         |                       |                        |     |
|---|------------------|--------|-------------------------|-----------------------|------------------------|-----|
| 3 | S-Peru&AC-Brazil | TAM-06 | <i>Myristicaceae</i>    | <i>Iryanthera</i>     | <i>laevis</i>          | 506 |
| 3 | S-Peru&AC-Brazil | TAM-06 | <i>Caryocaraceae</i>    | <i>Anthodiscus</i>    | <i>klugii</i>          | 652 |
| 3 | S-Peru&AC-Brazil | TAM-06 | <i>Myristicaceae</i>    | <i>Iryanthera</i>     | <i>juruensis</i>       | 512 |
| 3 | S-Peru&AC-Brazil | TAM-06 | <i>Sapotaceae</i>       | <i>Pouteria</i>       | <i>indet</i>           | 557 |
| 3 | S-Peru&AC-Brazil | TAM-06 | <i>Fabaceae</i>         | <i>Lonchocarpus</i>   | <i>indet</i>           | 710 |
| 3 | S-Peru&AC-Brazil | TAM-06 | <i>Annonaceae</i>       | <i>Guatteria</i>      | <i>indet</i>           | 548 |
| 3 | S-Peru&AC-Brazil | TAM-06 | <i>Meliaceae</i>        | <i>Guarea</i>         | <i>gomma</i>           | 611 |
| 3 | S-Peru&AC-Brazil | TAM-06 | <i>Clusiaceae</i>       | <i>Symphonia</i>      | <i>globulifera</i>     | 590 |
| 3 | S-Peru&AC-Brazil | TAM-06 | <i>Salicaceae</i>       | <i>Laetia</i>         | <i>corymbulosa</i>     | 767 |
| 3 | S-Peru&AC-Brazil | TAM-06 | <i>Lecythidaceae</i>    | <i>Eschweilera</i>    | <i>coriacea</i>        | 679 |
| 3 | S-Peru&AC-Brazil | TAM-06 | <i>Sapotaceae</i>       | <i>Pouteria</i>       | <i>cladantha</i>       | 560 |
| 3 | S-Peru&AC-Brazil | TAM-06 | <i>Fabaceae</i>         | <i>Inga</i>           | <i>chartacea</i>       | 573 |
| 3 | S-Peru&AC-Brazil | TAM-06 | <i>Myristicaceae</i>    | <i>Virola</i>         | <i>calophylla</i>      | 470 |
| 3 | S-Peru&AC-Brazil | TAM-06 | <i>Fabaceae</i>         | <i>Toluidifera</i>    | <i>balsamum</i>        | 691 |
| 3 | S-Peru&AC-Brazil | TAM-07 | <i>Moraceae</i>         | <i>Olmedia</i>        | <i>tomentosa</i>       | 730 |
| 3 | S-Peru&AC-Brazil | TAM-07 | <i>Myristicaceae</i>    | <i>Virola</i>         | <i>sebifera</i>        | 452 |
| 3 | S-Peru&AC-Brazil | TAM-07 | <i>Fabaceae</i>         | <i>Tachigali</i>      | <i>polyphylla</i>      | 673 |
| 3 | S-Peru&AC-Brazil | TAM-07 | <i>Fabaceae</i>         | <i>Hymenaea</i>       | <i>parvifolia</i>      | 642 |
| 3 | S-Peru&AC-Brazil | TAM-07 | <i>Urticaceae</i>       | <i>Pourouma</i>       | <i>minor</i>           | 686 |
| 3 | S-Peru&AC-Brazil | TAM-07 | <i>Urticaceae</i>       | <i>Pourouma</i>       | <i>minor</i>           | 562 |
| 3 | S-Peru&AC-Brazil | TAM-07 | <i>Urticaceae</i>       | <i>Pourouma</i>       | <i>minor</i>           | 549 |
| 3 | S-Peru&AC-Brazil | TAM-07 | <i>Urticaceae</i>       | <i>Pourouma</i>       | <i>minor</i>           | 517 |
| 3 | S-Peru&AC-Brazil | TAM-07 | <i>Myristicaceae</i>    | <i>Iryanthera</i>     | <i>laevis</i>          | 660 |
| 3 | S-Peru&AC-Brazil | TAM-07 | <i>Burseraceae</i>      | <i>Protium</i>        | <i>indet</i>           | 674 |
| 3 | S-Peru&AC-Brazil | TAM-07 | <i>Lauraceae</i>        | <i>Ocotea</i>         | <i>indet</i>           | 548 |
| 3 | S-Peru&AC-Brazil | TAM-07 | <i>Lauraceae</i>        | <i>Nectandra</i>      | <i>indet</i>           | 639 |
| 3 | S-Peru&AC-Brazil | TAM-07 | <i>Fabaceae</i>         | <i>Crudia</i>         | <i>indet</i>           | 821 |
| 3 | S-Peru&AC-Brazil | TAM-07 | <i>Chrysobalanaceae</i> | <i>Licania</i>        | <i>heteromorpha</i>    | 867 |
| 3 | S-Peru&AC-Brazil | TAM-07 | <i>Lecythidaceae</i>    | <i>Bertholletia</i>   | <i>excelsa</i>         | 692 |
| 3 | S-Peru&AC-Brazil | TAM-07 | <i>Melastomataceae</i>  | <i>Miconia</i>        | <i>dolichorrhyncha</i> | 681 |
| 3 | S-Peru&AC-Brazil | TAM-07 | <i>Bignoniaceae</i>     | <i>Jacaranda</i>      | <i>copaia</i>          | 537 |
| 3 | S-Peru&AC-Brazil | TAM-07 | <i>Clusiaceae</i>       | <i>Calophyllum</i>    | <i>brasiliense</i>     | 607 |
| 3 | S-Peru&AC-Brazil | TAM-07 | <i>Fabaceae</i>         | <i>Sclerolobium</i>   | <i>bracteosum</i>      | 576 |
| 3 | S-Peru&AC-Brazil | TAM-07 | <i>Burseraceae</i>      | <i>Tetragastris</i>   | <i>altissima</i>       | 627 |
| 2 | Bolivia          | CHO-01 | <i>Vochysiaceae</i>     | <i>Erisma</i>         | <i>uncinatum</i>       | 533 |
| 2 | Bolivia          | CHO-01 | <i>Vochysiaceae</i>     | <i>Erisma</i>         | <i>uncinatum</i>       | 489 |
| 2 | Bolivia          | CHO-01 | <i>Moraceae</i>         | <i>Olmedia</i>        | <i>tomentosa</i>       | 385 |
| 2 | Bolivia          | CHO-01 | <i>Apocynaceae</i>      | <i>Laxoplumeria</i>   | <i>tessmannii</i>      | 440 |
| 2 | Bolivia          | CHO-01 | <i>Sapotaceae</i>       | <i>Ecclinusa</i>      | <i>ramiflora</i>       | 552 |
| 2 | Bolivia          | CHO-01 | <i>Moraceae</i>         | <i>Pseudolmedia</i>   | <i>macrophylla</i>     | 476 |
| 2 | Bolivia          | CHO-01 | <i>Fabaceae</i>         | <i>Pterocarpus</i>    | <i>indet</i>           | 631 |
| 2 | Bolivia          | CHO-01 | <i>Fabaceae</i>         | <i>Pithecellobium</i> | <i>indet</i>           | 674 |
| 2 | Bolivia          | CHO-01 | <i>Fabaceae</i>         | <i>Inga</i>           | <i>indet</i>           | 503 |
| 2 | Bolivia          | CHO-01 | <i>Chrysobalanaceae</i> | <i>indet</i>          | <i>indet</i>           | 480 |
| 2 | Bolivia          | CHO-01 | <i>Urticaceae</i>       | <i>Pourouma</i>       | <i>guianensis</i>      | 505 |
| 2 | Bolivia          | CHO-01 | <i>Urticaceae</i>       | <i>Pourouma</i>       | <i>guianensis</i>      | 495 |
| 2 | Bolivia          | CHO-01 | <i>Lauraceae</i>        | <i>Ocotea</i>         | <i>guianensis</i>      | 552 |
| 2 | Bolivia          | CHO-01 | <i>Burseraceae</i>      | <i>Crepidospermum</i> | <i>goudotianum</i>     | 594 |
| 2 | Bolivia          | CHO-01 | <i>Burseraceae</i>      | <i>Crepidospermum</i> | <i>goudotianum</i>     | 531 |
| 2 | Bolivia          | CHO-01 | <i>Rubiaceae</i>        | <i>Capirona</i>       | <i>decorticans</i>     | 498 |
| 2 | Bolivia          | CHO-01 | <i>Sapindaceae</i>      | <i>Talisia</i>        | <i>angustifolia</i>    | 701 |
| 2 | Bolivia          | CHO-01 | <i>Fabaceae</i>         | <i>Dipteryx</i>       | <i>alata</i>           | 838 |
| 2 | Bolivia          | HCC-21 | <i>Bignoniaceae</i>     | <i>Tabebuia</i>       | <i>serratifolia</i>    | 617 |
| 2 | Bolivia          | HCC-21 | <i>Annonaceae</i>       | <i>Xylopia</i>        | <i>sericea</i>         | 424 |

|   |         |        |                        |                     |                       |     |
|---|---------|--------|------------------------|---------------------|-----------------------|-----|
| 2 | Bolivia | HCC-21 | <i>Annonaceae</i>      | <i>Xylopia</i>      | <i>sericea</i>        | 415 |
| 2 | Bolivia | HCC-21 | <i>Annonaceae</i>      | <i>Xylopia</i>      | <i>sericea</i>        | 320 |
| 2 | Bolivia | HCC-21 | <i>Fabaceae</i>        | <i>Machaerium</i>   | <i>robiniiifolium</i> | 830 |
| 2 | Bolivia | HCC-21 | <i>Fabaceae</i>        | <i>Inga</i>         | <i>marginata</i>      | 574 |
| 2 | Bolivia | HCC-21 | <i>Styracaceae</i>     | <i>Styrax</i>       | <i>indet</i>          | 719 |
| 2 | Bolivia | HCC-21 | <i>Styracaceae</i>     | <i>Styrax</i>       | <i>indet</i>          | 562 |
| 2 | Bolivia | HCC-21 | <i>Sapotaceae</i>      | <i>Pouteria</i>     | <i>indet</i>          | 587 |
| 2 | Bolivia | HCC-21 | <i>Urticaceae</i>      | <i>Pourouma</i>     | <i>guianensis</i>     | 484 |
| 2 | Bolivia | HCC-21 | <i>Urticaceae</i>      | <i>Pourouma</i>     | <i>guianensis</i>     | 427 |
| 2 | Bolivia | HCC-21 | <i>Sapotaceae</i>      | <i>Pouteria</i>     | <i>glomerata</i>      | 675 |
| 2 | Bolivia | HCC-21 | <i>Sapotaceae</i>      | <i>Pouteria</i>     | <i>glomerata</i>      | 625 |
| 2 | Bolivia | HCC-21 | <i>Sapotaceae</i>      | <i>Pouteria</i>     | <i>glomerata</i>      | 575 |
| 2 | Bolivia | HCC-21 | <i>Sapotaceae</i>      | <i>Pouteria</i>     | <i>glomerata</i>      | 564 |
| 2 | Bolivia | HCC-21 | <i>Sapotaceae</i>      | <i>Pouteria</i>     | <i>glomerata</i>      | 530 |
| 2 | Bolivia | HCC-21 | <i>Fabaceae</i>        | <i>Inga</i>         | <i>disticha</i>       | 725 |
| 2 | Bolivia | HCC-21 | <i>Fabaceae</i>        | <i>Inga</i>         | <i>cylindrica</i>     | 546 |
| 2 | Bolivia | HCC-21 | <i>Malpighiaceae</i>   | <i>Byrsonima</i>    | <i>crispa</i>         | 624 |
| 2 | Bolivia | HCC-21 | <i>Malpighiaceae</i>   | <i>Byrsonima</i>    | <i>coriacea</i>       | 651 |
| 2 | Bolivia | HCC-22 | <i>Vochysiaceae</i>    | <i>Erisma</i>       | <i>uncinatum</i>      | 456 |
| 2 | Bolivia | HCC-22 | <i>Staphyleaceae</i>   | <i>Turpinia</i>     | <i>occidentalis</i>   | 698 |
| 2 | Bolivia | HCC-22 | <i>Staphyleaceae</i>   | <i>Turpinia</i>     | <i>occidentalis</i>   | 373 |
| 2 | Bolivia | HCC-22 | <i>Moraceae</i>        | <i>Ficus</i>        | <i>maxima</i>         | 628 |
| 2 | Bolivia | HCC-22 | <i>Moraceae</i>        | <i>Ficus</i>        | <i>maxima</i>         | 377 |
| 2 | Bolivia | HCC-22 | <i>Fabaceae</i>        | <i>Inga</i>         | <i>marginata</i>      | 578 |
| 2 | Bolivia | HCC-22 | <i>Myrtaceae</i>       | <i>Eugenia</i>      | <i>indet</i>          | 518 |
| 2 | Bolivia | HCC-22 | <i>Euphorbiaceae</i>   | <i>Conceveiba</i>   | <i>indet</i>          | 550 |
| 2 | Bolivia | HCC-22 | <i>Euphorbiaceae</i>   | <i>Conceveiba</i>   | <i>indet</i>          | 452 |
| 2 | Bolivia | HCC-22 | <i>Urticaceae</i>      | <i>Pourouma</i>     | <i>guianensis</i>     | 611 |
| 2 | Bolivia | HCC-22 | <i>Urticaceae</i>      | <i>Pourouma</i>     | <i>guianensis</i>     | 473 |
| 2 | Bolivia | HCC-22 | <i>Urticaceae</i>      | <i>Pourouma</i>     | <i>guianensis</i>     | 470 |
| 2 | Bolivia | HCC-22 | <i>Urticaceae</i>      | <i>Pourouma</i>     | <i>guianensis</i>     | 406 |
| 2 | Bolivia | HCC-22 | <i>Sapotaceae</i>      | <i>Pouteria</i>     | <i>glomerata</i>      | 600 |
| 2 | Bolivia | HCC-22 | <i>Euphorbiaceae</i>   | <i>Alchornea</i>    | <i>glandulosa</i>     | 415 |
| 2 | Bolivia | HCC-22 | <i>Bignoniaceae</i>    | <i>Jacaranda</i>    | <i>glabra</i>         | 523 |
| 2 | Bolivia | HCC-22 | <i>Rutaceae</i>        | <i>Metrodorea</i>   | <i>flavida</i>        | 717 |
| 2 | Bolivia | HCC-22 | <i>Rutaceae</i>        | <i>Metrodorea</i>   | <i>flavida</i>        | 703 |
| 2 | Bolivia | HCC-22 | <i>Rutaceae</i>        | <i>Metrodorea</i>   | <i>flavida</i>        | 683 |
| 2 | Bolivia | HCC-22 | <i>Rutaceae</i>        | <i>Metrodorea</i>   | <i>flavida</i>        | 634 |
| 2 | Bolivia | HCC-22 | <i>Malpighiaceae</i>   | <i>Byrsonima</i>    | <i>crispa</i>         | 675 |
| 2 | Bolivia | LFB-01 | <i>Vochysiaceae</i>    | <i>Erisma</i>       | <i>uncinatum</i>      | 509 |
| 2 | Bolivia | LFB-01 | <i>Vochysiaceae</i>    | <i>Erisma</i>       | <i>uncinatum</i>      | 476 |
| 2 | Bolivia | LFB-01 | <i>Moraceae</i>        | <i>Olmedia</i>      | <i>tomentosa</i>      | 443 |
| 2 | Bolivia | LFB-01 | <i>Euphorbiaceae</i>   | <i>Hieronyma</i>    | <i>oblonga</i>        | 713 |
| 2 | Bolivia | LFB-01 | <i>Euphorbiaceae</i>   | <i>Hieronyma</i>    | <i>oblonga</i>        | 641 |
| 2 | Bolivia | LFB-01 | <i>Euphorbiaceae</i>   | <i>Hieronyma</i>    | <i>oblonga</i>        | 564 |
| 2 | Bolivia | LFB-01 | <i>Melastomataceae</i> | <i>Miconia</i>      | <i>multiflora</i>     | 771 |
| 2 | Bolivia | LFB-01 | <i>Moraceae</i>        | <i>Pseudolmedia</i> | <i>macrophylla</i>    | 647 |
| 2 | Bolivia | LFB-01 | <i>Moraceae</i>        | <i>Pseudolmedia</i> | <i>macrophylla</i>    | 468 |
| 2 | Bolivia | LFB-01 | <i>Moraceae</i>        | <i>Pseudolmedia</i> | <i>laevis</i>         | 503 |
| 2 | Bolivia | LFB-01 | <i>Moraceae</i>        | <i>Pseudolmedia</i> | <i>laevis</i>         | 494 |
| 2 | Bolivia | LFB-01 | <i>Moraceae</i>        | <i>Pseudolmedia</i> | <i>laevis</i>         | 389 |
| 2 | Bolivia | LFB-01 | <i>Salicaceae</i>      | <i>Casearia</i>     | <i>indet</i>          | 635 |
| 2 | Bolivia | LFB-01 | <i>Salicaceae</i>      | <i>Casearia</i>     | <i>indet</i>          | 556 |
| 2 | Bolivia | LFB-01 | <i>Urticaceae</i>      | <i>Pourouma</i>     | <i>guianensis</i>     | 595 |

|   |           |        |                         |                       |                     |     |
|---|-----------|--------|-------------------------|-----------------------|---------------------|-----|
| 2 | Bolivia   | LFB-01 | <i>Urticaceae</i>       | <i>Pourouma</i>       | <i>guianensis</i>   | 498 |
| 2 | Bolivia   | LFB-01 | <i>Elaeocarpaceae</i>   | <i>Sloanea</i>        | <i>eichleri</i>     | 580 |
| 2 | Bolivia   | LFB-01 | <i>Moraceae</i>         | <i>Brosimum</i>       | <i>acutifolium</i>  | 598 |
| 2 | Bolivia   | LFB-02 | <i>Combretaceae</i>     | <i>Buchenavia</i>     | <i>viridiflora</i>  | 642 |
| 2 | Bolivia   | LFB-02 | <i>Vochysiaceae</i>     | <i>Erisma</i>         | <i>uncinatum</i>    | 462 |
| 2 | Bolivia   | LFB-02 | <i>Melastomataceae</i>  | <i>Miconia</i>        | <i>pyrifolia</i>    | 580 |
| 2 | Bolivia   | LFB-02 | <i>Melastomataceae</i>  | <i>Miconia</i>        | <i>pyrifolia</i>    | 569 |
| 2 | Bolivia   | LFB-02 | <i>Vochysiaceae</i>     | <i>Qualea</i>         | <i>paraensis</i>    | 638 |
| 2 | Bolivia   | LFB-02 | <i>Vochysiaceae</i>     | <i>Qualea</i>         | <i>paraensis</i>    | 497 |
| 2 | Bolivia   | LFB-02 | <i>Melastomataceae</i>  | <i>Miconia</i>        | <i>multiflora</i>   | 616 |
| 2 | Bolivia   | LFB-02 | <i>Moraceae</i>         | <i>Pseudolmedia</i>   | <i>macrophylla</i>  | 626 |
| 2 | Bolivia   | LFB-02 | <i>Moraceae</i>         | <i>Pseudolmedia</i>   | <i>laevis</i>       | 670 |
| 2 | Bolivia   | LFB-02 | <i>Moraceae</i>         | <i>Pseudolmedia</i>   | <i>laevis</i>       | 507 |
| 2 | Bolivia   | LFB-02 | <i>Lauraceae</i>        | <i>Nectandra</i>      | <i>indet</i>        | 558 |
| 2 | Bolivia   | LFB-02 | <i>Melastomataceae</i>  | <i>Miconia</i>        | <i>indet</i>        | 647 |
| 2 | Bolivia   | LFB-02 | <i>Elaeocarpaceae</i>   | <i>Sloanea</i>        | <i>eichleri</i>     | 716 |
| 2 | Bolivia   | LFB-02 | <i>Elaeocarpaceae</i>   | <i>Sloanea</i>        | <i>eichleri</i>     | 637 |
| 2 | Bolivia   | LFB-02 | <i>Fabaceae</i>         | <i>Inga</i>           | <i>cylindrica</i>   | 631 |
| 2 | Bolivia   | LFB-02 | <i>Euphorbiaceae</i>    | <i>Hevea</i>          | <i>brasiliensis</i> | 616 |
| 2 | Bolivia   | LSL-01 | <i>Melastomataceae</i>  | <i>Miconia</i>        | <i>poepigii</i>     | 685 |
| 2 | Bolivia   | LSL-01 | <i>Melastomataceae</i>  | <i>Miconia</i>        | <i>poepigii</i>     | 676 |
| 2 | Bolivia   | LSL-01 | <i>Melastomataceae</i>  | <i>Miconia</i>        | <i>poepigii</i>     | 493 |
| 2 | Bolivia   | LSL-01 | <i>Fabaceae</i>         | <i>Inga</i>           | <i>laurina</i>      | 726 |
| 2 | Bolivia   | LSL-01 | <i>Fabaceae</i>         | <i>Inga</i>           | <i>laurina</i>      | 700 |
| 2 | Bolivia   | LSL-01 | <i>Fabaceae</i>         | <i>Inga</i>           | <i>laurina</i>      | 669 |
| 2 | Bolivia   | LSL-01 | <i>Malvaceae</i>        | <i>Pachira</i>        | <i>insignis</i>     | 641 |
| 2 | Bolivia   | LSL-01 | <i>Annonaceae</i>       | <i>Xylopia</i>        | <i>indet</i>        | 409 |
| 2 | Bolivia   | LSL-01 | <i>Annonaceae</i>       | <i>Xylopia</i>        | <i>indet</i>        | 289 |
| 2 | Bolivia   | LSL-01 | <i>Anacardiaceae</i>    | <i>Thyrsodium</i>     | <i>indet</i>        | 455 |
| 2 | Bolivia   | LSL-01 | <i>Melastomataceae</i>  | <i>Miconia</i>        | <i>indet</i>        | 623 |
| 2 | Bolivia   | LSL-01 | <i>Moraceae</i>         | <i>Helicostylis</i>   | <i>indet</i>        | 441 |
| 2 | Bolivia   | LSL-01 | <i>Fabaceae</i>         | <i>Inga</i>           | <i>capitata</i>     | 455 |
| 2 | Bolivia   | LSL-01 | <i>Sapotaceae</i>       | <i>Pouteria</i>       | <i>caimito</i>      | 702 |
| 2 | Bolivia   | LSL-02 | <i>Violaceae</i>        | <i>Rinoreaocarpus</i> | <i>ulei</i>         | 597 |
| 2 | Bolivia   | LSL-02 | <i>Violaceae</i>        | <i>Rinoreaocarpus</i> | <i>ulei</i>         | 584 |
| 2 | Bolivia   | LSL-02 | <i>Melastomataceae</i>  | <i>Miconia</i>        | <i>poepigii</i>     | 632 |
| 2 | Bolivia   | LSL-02 | <i>Melastomataceae</i>  | <i>Miconia</i>        | <i>poepigii</i>     | 608 |
| 2 | Bolivia   | LSL-02 | <i>Melastomataceae</i>  | <i>Miconia</i>        | <i>poepigii</i>     | 570 |
| 2 | Bolivia   | LSL-02 | <i>Melastomataceae</i>  | <i>Miconia</i>        | <i>poepigii</i>     | 539 |
| 2 | Bolivia   | LSL-02 | <i>Melastomataceae</i>  | <i>Miconia</i>        | <i>poepigii</i>     | 522 |
| 2 | Bolivia   | LSL-02 | <i>Melastomataceae</i>  | <i>Miconia</i>        | <i>poepigii</i>     | 507 |
| 2 | Bolivia   | LSL-02 | <i>Melastomataceae</i>  | <i>Miconia</i>        | <i>poepigii</i>     | 443 |
| 2 | Bolivia   | LSL-02 | <i>Vochysiaceae</i>     | <i>Qualea</i>         | <i>paraensis</i>    | 607 |
| 2 | Bolivia   | LSL-02 | <i>Vochysiaceae</i>     | <i>Qualea</i>         | <i>paraensis</i>    | 575 |
| 2 | Bolivia   | LSL-02 | <i>Vochysiaceae</i>     | <i>Vochysia</i>       | <i>mapirensis</i>   | 416 |
| 2 | Bolivia   | LSL-02 | <i>Annonaceae</i>       | <i>Xylopia</i>        | <i>indet</i>        | 300 |
| 2 | Bolivia   | LSL-02 | <i>Polygonaceae</i>     | <i>indet</i>          | <i>indet</i>        | 510 |
| 2 | Bolivia   | LSL-02 | <i>Chrysobalanaceae</i> | <i>Licania</i>        | <i>gardneri</i>     | 553 |
| 2 | Bolivia   | LSL-02 | <i>Lacistemataceae</i>  | <i>Lacistema</i>      | <i>aggregatum</i>   | 511 |
| 1 | MT-Brazil | ALF-01 | <i>Myristicaceae</i>    | <i>Virola</i>         | <i>indet</i>        | 345 |
| 1 | MT-Brazil | ALF-01 | <i>Annonaceae</i>       | <i>Unonopsis</i>      | <i>indet</i>        | 415 |
| 1 | MT-Brazil | ALF-01 | <i>Burseraceae</i>      | <i>Protium</i>        | <i>indet</i>        | 653 |
| 1 | MT-Brazil | ALF-01 | <i>Burseraceae</i>      | <i>Protium</i>        | <i>indet</i>        | 620 |
| 1 | MT-Brazil | ALF-01 | <i>Burseraceae</i>      | <i>Protium</i>        | <i>indet</i>        | 588 |

|   |           |        |                        |                    |                  |     |
|---|-----------|--------|------------------------|--------------------|------------------|-----|
| 1 | MT-Brazil | ALF-01 | <i>Burseraceae</i>     | <i>Protium</i>     | <i>indet</i>     | 563 |
| 1 | MT-Brazil | ALF-01 | <i>Burseraceae</i>     | <i>Protium</i>     | <i>indet</i>     | 555 |
| 1 | MT-Brazil | ALF-01 | <i>Burseraceae</i>     | <i>Protium</i>     | <i>indet</i>     | 554 |
| 1 | MT-Brazil | ALF-01 | <i>Burseraceae</i>     | <i>Protium</i>     | <i>indet</i>     | 543 |
| 1 | MT-Brazil | ALF-01 | <i>Burseraceae</i>     | <i>Protium</i>     | <i>indet</i>     | 541 |
| 1 | MT-Brazil | ALF-01 | <i>Burseraceae</i>     | <i>Protium</i>     | <i>indet</i>     | 532 |
| 1 | MT-Brazil | ALF-01 | <i>Sapotaceae</i>      | <i>Pouteria</i>    | <i>indet</i>     | 656 |
| 1 | MT-Brazil | ALF-01 | <i>Sapotaceae</i>      | <i>Pouteria</i>    | <i>indet</i>     | 539 |
| 1 | MT-Brazil | ALF-01 | <i>Urticaceae</i>      | <i>Pourouma</i>    | <i>indet</i>     | 541 |
| 1 | MT-Brazil | ALF-01 | <i>Meliaceae</i>       | <i>indet</i>       | <i>indet</i>     | 633 |
| 1 | MT-Brazil | ALF-01 | <i>Meliaceae</i>       | <i>indet</i>       | <i>indet</i>     | 606 |
| 1 | MT-Brazil | ALF-01 | <i>Meliaceae</i>       | <i>indet</i>       | <i>indet</i>     | 568 |
| 1 | MT-Brazil | ALF-01 | <i>Melastomataceae</i> | <i>indet</i>       | <i>indet</i>     | 565 |
| 1 | MT-Brazil | ALF-01 | <i>Monimiaceae</i>     | <i>indet</i>       | <i>indet</i>     | 554 |
| 1 | MT-Brazil | ALF-01 | <i>Moraceae</i>        | <i>indet</i>       | <i>indet</i>     | 545 |
| 1 | MT-Brazil | ALF-01 | <i>Ulmaceae</i>        | <i>indet</i>       | <i>indet</i>     | 532 |
| 1 | MT-Brazil | ALF-01 | <i>Malvaceae</i>       | <i>indet</i>       | <i>indet</i>     | 514 |
| 1 | MT-Brazil | ALF-01 | <i>indet</i>           | <i>indet</i>       | <i>indet</i>     | 495 |
| 1 | MT-Brazil | ALF-01 | <i>Moraceae</i>        | <i>indet</i>       | <i>indet</i>     | 484 |
| 1 | MT-Brazil | ALF-01 | <i>Violaceae</i>       | <i>indet</i>       | <i>indet</i>     | 476 |
| 1 | MT-Brazil | ALF-01 | <i>Lecythidaceae</i>   | <i>Eschweilera</i> | <i>indet</i>     | 505 |
| 1 | MT-Brazil | SIN-01 | <i>Clusiaceae</i>      | <i>Tovomita</i>    | <i>indet</i>     | 586 |
| 1 | MT-Brazil | SIN-01 | <i>Burseraceae</i>     | <i>Protium</i>     | <i>indet</i>     | 563 |
| 1 | MT-Brazil | SIN-01 | <i>Ochnaceae</i>       | <i>Ouratea</i>     | <i>indet</i>     | 730 |
| 1 | MT-Brazil | SIN-01 | <i>Myristicaceae</i>   | <i>indet</i>       | <i>indet</i>     | 801 |
| 1 | MT-Brazil | SIN-01 | <i>Sapindaceae</i>     | <i>indet</i>       | <i>indet</i>     | 748 |
| 1 | MT-Brazil | SIN-01 | <i>Sapindaceae</i>     | <i>indet</i>       | <i>indet</i>     | 746 |
| 1 | MT-Brazil | SIN-01 | <i>Lauraceae</i>       | <i>indet</i>       | <i>indet</i>     | 612 |
| 1 | MT-Brazil | SIN-01 | <i>Fabaceae</i>        | <i>indet</i>       | <i>indet</i>     | 503 |
| 1 | MT-Brazil | SIN-01 | <i>Lauraceae</i>       | <i>indet</i>       | <i>indet</i>     | 495 |
| 1 | MT-Brazil | SIN-01 | <i>Meliaceae</i>       | <i>Guarea</i>      | <i>indet</i>     | 602 |
| 1 | MT-Brazil | SIN-01 | <i>Rutaceae</i>        | <i>Galipea</i>     | <i>indet</i>     | 599 |
| 1 | MT-Brazil | SIN-01 | <i>Fabaceae</i>        | <i>Dialium</i>     | <i>indet</i>     | 731 |
| 1 | MT-Brazil | SIN-01 | <i>Fabaceae</i>        | <i>Dialium</i>     | <i>indet</i>     | 703 |
| 1 | MT-Brazil | SIN-01 | <i>Fabaceae</i>        | <i>Dialium</i>     | <i>indet</i>     | 633 |
| 1 | MT-Brazil | SIN-01 | <i>Fabaceae</i>        | <i>Dialium</i>     | <i>indet</i>     | 609 |
| 1 | MT-Brazil | SIN-01 | <i>Moraceae</i>        | <i>Brosimum</i>    | <i>indet</i>     | 540 |
| 1 | MT-Brazil | SIN-01 | <i>Boraginaceae</i>    | <i>Cerdana</i>     | <i>alliodora</i> | 418 |
